# Supplementary material for: Silver-catalyzed desulfurizative annulation of 1,2-benzisothiazoles with ynamides to construct multi-substituted isoquinolines
Source: Royal Society of Chemistry journal article supplement (doi:10.1039/d1qo01054a), 2021-01-01
Supplement: d1qo01054a1.pdf [file d1qo01054a1.pdf]

## Supporting Information

### **Silver-Catalyzed Desulfurizative Annulation of 1,2-Benzisothiazoles with Ynamides to Construct Multi-Substituted Isoquinolines**

Rui Fu<sup>a</sup>, Ran Liu<sup>a</sup>, Kang Lv<sup>a,b</sup>, Changlei Zhu<sup>a</sup> and Xiaoguang Bao<sup>\*a</sup>

<sup>a</sup> *Innovation Center for Chemical Sciences, College of Chemistry, Chemical Engineering and Materials Science, Soochow University, 199 Ren-Ai Road, Suzhou Industrial Park, Suzhou, Jiangsu 215123, China.*

<sup>b</sup> *Department of Chemistry and Chemical Engineering, Jining University, Qufu, Shandong 273155, China.*

E-mail: xgbao@suda.edu.cn

## **Table of Contents**

|                                                             |       |
|-------------------------------------------------------------|-------|
| <b>1. General Information</b> .....                         | 2     |
| <b>2. General Procedure and Characterization Data</b> ..... | 2~14  |
| <b>3. Figures S1~S5</b> .....                               | 15~17 |
| <b>4. X-ray Crystallographic Data of 3aa</b> .....          | 18    |
| <b>5. X-ray diffraction analysis of S<sub>8</sub></b> ..... | 19    |
| <b>6. NMR Spectra</b> .....                                 | 20~56 |
| <b>7. Cartesian Coordinates and Energies</b> .....          | 57~78 |

## 1. General Information

All reactions were carried out under argon atmosphere unless otherwise stated. Commercially available reagents were used without further purification.  $^1\text{H}$  NMR spectra were recorded on a BRUKER AVANCE III HD (400 MHz) spectrometer. Chemical shifts are reported in ppm from tetramethylsilane with the solvent resonance as internal standard ( $\text{CDCl}_3$ :  $\delta$  7.26). Data are reported as follows: chemical shift, multiplicity (s = singlet, d = doublet, t = triplet, q = quadruplet, m = multiplet), coupling constants (Hz) and integration.  $^{13}\text{C}$  NMR spectra were recorded on a BRUKER AVANCE III HD (100 MHz) spectrometer with complete proton decoupling. Chemical shifts are reported in ppm from tetramethylsilane with the solvent resonance as the internal standard ( $\text{CDCl}_3$ :  $\delta$  77.16).  $^{19}\text{F}$  NMR spectra were recorded on a BRUKER AVANCE III HD (377 MHz) spectrometer. High resolution mass spectra (HRMS) were measured with a GCT Premier<sup>TM</sup> and BRUKER micrOTF-Q III. Melting points were measured using INESA WRR melting point instrument and values are uncorrected. X-ray crystal structure analyses were measured on a Bruker D8 Venture instrument. Flash column chromatography was performed using silica gel (300-400 mesh).

## 2. General Procedure and Characterization Data

### 2.1. General procedure for preparation of ynamide

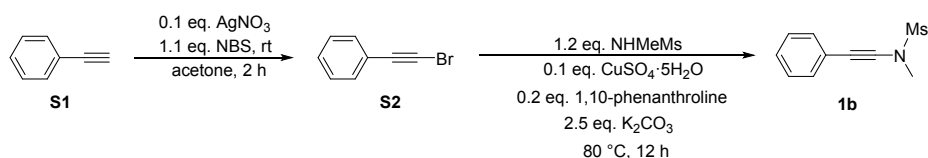

To a solution of phenylacetylene (**S1**) (2.20 mL, 20 mmol) in acetone (60 mL) was added NBS (4.22 g, 24 mmol) and  $\text{AgNO}_3$  (169.9 mg, 1.0 mmol), the resulting mixture was stirred under Ar at room temperature for 2 hours. After removing excess acetone, the reaction was quenched with saturated  $\text{NH}_4\text{Cl}$  solution, and the organic layer was extracted with petroleum ether (40 mL  $\times$  2), dried over anhydrous  $\text{NaSO}_4$  and concentrated under reduced pressure afford a pure colorless oil of bromoalkyne **S2** (2.94g, 81%).

To a dried flask was added *N*-methymethanesulphonamide (2.13 g, 19.5 mmol),  $\text{CuSO}_4 \cdot 5\text{H}_2\text{O}$  (0.50 g, 2.0 mmol), 1,10-phenanthroline (0.74 g, 4.1 mmol) and  $\text{K}_2\text{CO}_3$  (5.54 g, 40 mmol). The resulting mixture was subsequently treated with anhydrous toluene (40 mL) and bromoalkyne (**S2**) (2.94 g, 16.2 mmol), and stirred at  $80^\circ\text{C}$  overnight under an atmosphere of Ar. When the reaction is complete, the crude mixture was cooled to room temperature, filtered through Celite, and concentrated in vacuo. The resulting residue was purified by flash column chromatography on silica gel, giving the pure ynamide **1b** as a pale yellow solid (2.86 g, 84%).

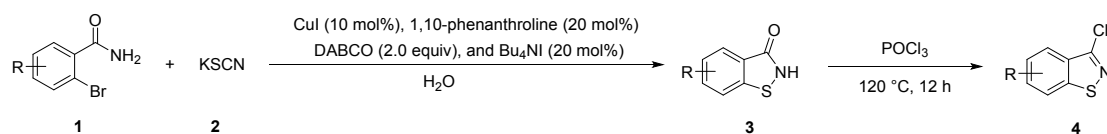

**2.2. General Procedure for the Synthesis of Benzisothiazol-3(2H)-one (3).** A sealed tube was charged with the mixture of *o*-halobenzamide **1** (5 mmol), potassium thiocyanate **2** (10 mmol), CuI (0.5 mmol), 1,10-phenanthroline (1 mmol), DABCO (10 mmol), and Bu<sub>4</sub>NI (0.1 mmol) and then stirred in H<sub>2</sub>O (10 mL) at room temperature under nitrogen atmosphere. Half an hour later, the tube was sealed, and the mixture was allowed to stir at 140–160 °C for the indicated time. After completion of the reaction, the mixture was cooled to room temperature, and then H<sub>2</sub>O (50 mL) was added and the mixture extracted with EtOAc (50 mL × 3) and dried by anhydrous Na<sub>2</sub>SO<sub>4</sub>. Evaporation of the solvent followed by purification on silica gel (petroleum ether/ethyl acetate = 2/1) provided the corresponding product **3**.

**2.3. General Procedure for the Synthesis of 3-Cl-1,2-Benzisothiazoles (4).** A sealed tube was charged with benzisothiazol-3(2H)-one (**3**) (0.5 mmol) and POCl<sub>3</sub> (2 mL) and then stirred at 120 °C for 12 h. After completion of the reaction, the mixture was cooled to room temperature, and then H<sub>2</sub>O (10 mL) was added and the mixture extracted with EtOAc (10 mL × 3) and dried by anhydrous Na<sub>2</sub>SO<sub>4</sub>. Evaporation of the solvent followed by purification on silica gel (petroleum ether/ethyl acetate = 10/1) provided the corresponding product **4**.

**3-chloro-6-methylbenzo[*d*]isothiazole (1b).**

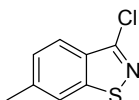

Colourless oil, PE/EA (10:1) as the eluent. <sup>1</sup>H NMR (400 MHz, CDCl<sub>3</sub>) δ 7.82 (d, *J* = 8.4 Hz, 1H), 7.61 (m, 1H), 7.27 (m, 1H), 2.51 (s, 3H). <sup>13</sup>C NMR (100 MHz, CDCl<sub>3</sub>) δ 152.55, 145.80, 139.83, 130.23, 127.74, 123.19, 119.68, 21.80.

**3-chloro-5-methylbenzo[*d*]isothiazole (1c).**

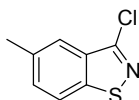

Colourless oil, PE/EA (10:1) as the eluent. <sup>1</sup>H NMR (400 MHz, CDCl<sub>3</sub>) δ 7.78 – 7.68 (m, 2H), 7.42 – 7.35 (m, 1H), 2.51 (s, 3H). <sup>13</sup>C NMR (100 MHz, CDCl<sub>3</sub>) δ 149.55, 145.54, 135.98, 132.44, 130.96, 123.13, 119.74, 21.33.

**3,6-dichlorobenzo[*d*]isothiazole. (1d).**

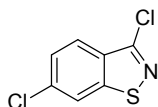

Colourless oil, PE/EA (10:1) as the eluent. <sup>1</sup>H NMR (400 MHz, CDCl<sub>3</sub>) δ 7.99 – 7.84 (m, 2H), 7.47 (dd, *J* = 8.6, 1.7 Hz, 1H). <sup>13</sup>C NMR (100 MHz, CDCl<sub>3</sub>) δ 153.18, 145.97, 136.33, 130.75, 126.94, 124.63, 119.81.

**3,5-dichlorobenzo[*d*]isothiazole (1e).**

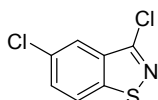

Colourless oil, PE/EA (10:1) as the eluent.  $^1\text{H}$  NMR (400 MHz,  $\text{CDCl}_3$ )  $\delta$  7.95 (dd,  $J = 2.0, 0.6$  Hz, 1H), 7.81 (dd,  $J = 8.7, 0.7$  Hz, 1H), 7.53 (dd,  $J = 8.7, 1.9$  Hz, 1H).  $^{13}\text{C}$  NMR (100 MHz,  $\text{CDCl}_3$ )  $\delta$  150.37, 145.21, 133.26, 132.30, 129.68, 123.21, 121.19.

***N*-(1-chloro-4-phenylisoquinolin-3-yl)-*N*-methylmethanesulfonamide (3aa).**

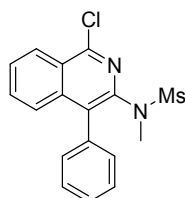

White solid, PE/EA (10:1) as the eluent, 28.4 mg, 82% yield, m.p. 189-190 °C.  $^1\text{H}$  NMR (400 MHz,  $\text{CDCl}_3$ )  $\delta$  8.45 – 8.35 (m, 1H), 7.74 – 7.61 (m, 3H), 7.56 – 7.43 (m, 5H), 3.18 (s, 3H), 3.01 (s, 3H).  $^{13}\text{C}$  NMR (100 MHz,  $\text{CDCl}_3$ )  $\delta$  149.96, 144.90, 139.03, 133.85, 132.03, 131.60, 130.39, 128.84, 128.52, 128.35, 126.72, 126.57, 126.47, 38.43, 37.80. HRMS (ESI)  $m/z$ : Calcd for:  $\text{C}_{17}\text{H}_{16}\text{ClN}_2\text{O}_2\text{S}$  [ $\text{M} + \text{H}$ ] $^+$  347.0616, Found: 347.0615.

***N*-(1-chloro-4-(4-fluorophenyl)isoquinolin-3-yl)-*N*-methylmethanesulfonamide (3ab).**

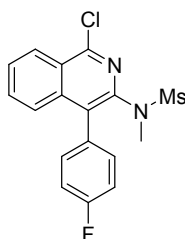

White solid, PE/EA (10:1) as the eluent, 29.1 mg, 80% yield, m.p. 191-192 °C.  $^1\text{H}$  NMR (400 MHz,  $\text{CDCl}_3$ )  $\delta$  8.43 – 8.36 (m, 1H), 7.76 – 7.66 (m, 2H), 7.63 – 7.57 (m, 1H), 7.48 – 7.38 (m, 2H), 7.28 – 7.15 (m, 2H), 3.22 (s, 3H), 3.02 (s, 3H).  $^{13}\text{C}$  NMR (100 MHz,  $\text{CDCl}_3$ )  $\delta$  162.76 (d,  $J = 247.8$  Hz), 150.28, 145.05, 139.03,  $\delta$  132.20 (d,  $J = 8.0$  Hz), 131.77, 131.24, 129.66 (d,  $J = 3.1$  Hz), 128.96, 126.62, 126.59, 126.51, 115.67 (d,  $J = 21.5$  Hz), 38.21, 37.83.  $^{19}\text{F}$  NMR (377 MHz,  $\text{CDCl}_3$ )  $\delta$  -113.23. HRMS (ESI)  $m/z$ : Calcd for:  $\text{C}_{17}\text{H}_{14}\text{ClFN}_2\text{O}_2\text{SNa}$  [ $\text{M} + \text{Na}$ ] $^+$  387.0341, Found: 387.0344.

***N*-(1-chloro-4-(4-chlorophenyl)isoquinolin-3-yl)-*N*-methylmethanesulfonamide (3ac).**

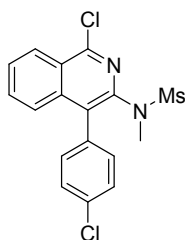

White solid, PE/EA (10:1) as the eluent, 28.1 mg, 74% yield, m.p. 205-206 °C.  $^1\text{H}$  NMR (400 MHz,

CDCl<sub>3</sub>) δ 8.47 – 8.33 (m, 1H), 7.76 – 7.66 (m, 2H), 7.63 – 7.57 (m, 1H), 7.54 – 7.47 (m, 2H), 7.43 – 7.34 (m, 2H), 3.22 (s, 3H), 3.03 (s, 3H). <sup>13</sup>C NMR (100 MHz, CDCl<sub>3</sub>) δ 150.44, 144.92, 138.81, 134.57, 132.26, 131.84, 131.79, 131.08, 129.03, 128.85, 126.62, 126.44, 38.15, 37.88. HRMS (ESI) *m/z*: Calcd for: C<sub>17</sub>H<sub>15</sub>Cl<sub>2</sub>N<sub>2</sub>O<sub>2</sub>S [M + H]<sup>+</sup> 381.0226, Found: 381.0215.

***N*-(4-(4-bromophenyl)-1-chloroisoquinolin-3-yl)-*N*-methylmethanesulfonamide (3dd).**

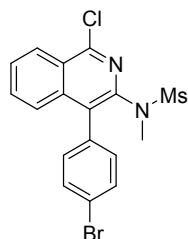

White solid, PE/EA (10:1) as the eluent, 31.8 mg, 75% yield, m.p. 199-200 °C. <sup>1</sup>H NMR (400 MHz, CDCl<sub>3</sub>) δ 8.43 – 8.35 (m, 1H), 7.77 – 7.64 (m, 4H), 7.62 – 7.56 (m, 1H), 7.37 – 7.31 (m, 2H), 3.22 (s, 3H), 3.03 (s, 3H). <sup>13</sup>C NMR (100 MHz, CDCl<sub>3</sub>) δ 150.46, 144.85, 138.74, 132.77, 132.08, 131.85, 131.80, 131.08, 129.04, 126.63, 126.43, 122.80, 38.14, 37.89. HRMS (ESI) *m/z*: Calcd for: C<sub>17</sub>H<sub>15</sub>BrClN<sub>2</sub>O<sub>2</sub>S [M + H]<sup>+</sup> 424.9721, Found: 424.9729.

***N*-(1-chloro-4-(4-(trifluoromethyl)phenyl)isoquinolin-3-yl)-*N*-methylmethanesulfonamide (3ae).**

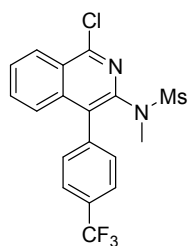

White solid, PE/EA (10:1) as the eluent, 29.0 mg, 70% yield, m.p. 155-156 °C. <sup>1</sup>H NMR (400 MHz, CDCl<sub>3</sub>) δ 8.46 – 8.36 (m, 1H), 7.82 – 7.78 (m, 2H), 7.73 (m, 2H), 7.64 – 7.57 (m, 2H), 7.56 – 7.50 (m, 1H), 3.22 (s, 3H), 3.04 (s, 3H). <sup>13</sup>C NMR (100 MHz, CDCl<sub>3</sub>) δ 150.85, 144.84, 138.60, 137.77, 132.03, 130.94, 130.90, 130.57 (q, *J* = 32.7 Hz), 129.17, 126.71, 126.62, 126.28, 125.49 (q, *J* = 3.6 Hz), 124.10 (q, *J* = 272.6 Hz), 115.66 (q, *J* = 21.2 Hz), 37.99, 37.96. <sup>19</sup>F NMR (377 MHz, CDCl<sub>3</sub>) δ -62.54. HRMS (ESI) *m/z*: Calcd for: C<sub>18</sub>H<sub>14</sub>ClF<sub>3</sub>N<sub>2</sub>O<sub>2</sub>SNa [M + Na]<sup>+</sup> 437.0315, Found: 437.0309.

**Methyl 4-(1-chloro-3-(*N*-methylmethanesulfonamido)isoquinolin-4-yl)benzoate (3af).**

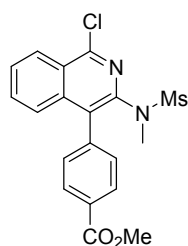

White solid, PE/EA (10:1) as the eluent, 31.5 mg, 78% yield, m.p. 158-159 °C. <sup>1</sup>H NMR (400 MHz, CDCl<sub>3</sub>) δ 8.45 – 8.39 (m, 1H), 8.23 – 8.17 (m, 2H), 7.76 – 7.67 (m, 2H), 7.58 – 7.51 (m, 3H), 3.98 (s, 3H), 3.20 (s, 3H), 3.02 (s, 3H). <sup>13</sup>C NMR (100 MHz, CDCl<sub>3</sub>) δ 166.79, 150.64, 144.77, 138.77, 138.57, 131.92, 131.30, 130.57, 130.17, 129.74, 129.08, 126.65, 126.58, 126.36, 52.29, 38.13, 37.88. HRMS (ESI) *m/z*: Calcd for: C<sub>19</sub>H<sub>18</sub>ClN<sub>2</sub>O<sub>4</sub>S [M + H]<sup>+</sup> 405.0670, Found: 405.0662.

***N*-(1-chloro-4-(4-nitrophenyl)isoquinolin-3-yl)-*N*-methylmethanesulfonamide (3ag).**

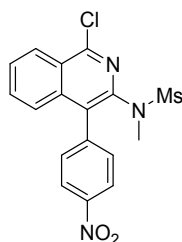

White solid, PE/EA (10:1) as the eluent, 24.2 mg, 62% yield, m.p. 257-258 °C. <sup>1</sup>H NMR (400 MHz, CDCl<sub>3</sub>) δ 8.47 – 8.44 (m, 1H), 8.42 – 8.38 (m, 2H), 7.80 – 7.72 (m, 2H), 7.68 – 7.63 (m, 2H), 7.53 – 7.48 (m, 1H), 3.21 (s, 3H), 3.07 (s, 3H). <sup>13</sup>C NMR (100 MHz, CDCl<sub>3</sub>) δ 151.43, 147.91, 144.72, 141.00, 138.22, 132.32, 131.62, 130.43, 129.40, 126.90, 126.65, 126.00, 123.70, 38.02, 37.69. HRMS (ESI) *m/z*: Calcd for: C<sub>17</sub>H<sub>15</sub>ClN<sub>3</sub>O<sub>4</sub>S [M + H]<sup>+</sup> 392.0466, Found: 392.0465.

***N*-(1-chloro-4-(*p*-tolyl)isoquinolin-3-yl)-*N*-methylmethanesulfonamide (3ah).**

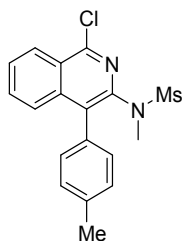

White solid, PE/EA (10:1) as the eluent, 27.4 mg, 76% yield, m.p. 174-175 °C. <sup>1</sup>H NMR (400 MHz, CDCl<sub>3</sub>) δ 8.41 – 8.30 (m, 1H), 7.74 – 7.61 (m, 3H), 7.33 (s, 4H), 3.20 (s, 3H), 3.01 (s, 3H), 2.45 (s, 3H). <sup>13</sup>C NMR (100 MHz, CDCl<sub>3</sub>) δ 149.71, 144.97, 139.18, 138.10, 132.08, 131.47, 130.74, 130.25, 129.24, 128.75, 126.80, 126.57, 126.42, 38.46, 37.79, 21.40. HRMS (ESI) *m/z*: Calcd for: C<sub>18</sub>H<sub>17</sub>ClN<sub>2</sub>O<sub>2</sub>SNa [M + Na]<sup>+</sup> 383.0591, Found: 383.0600.

***N*-(1-chloro-4-(4-methoxyphenyl)isoquinolin-3-yl)-*N*-methylmethanesulfonamide (3ai).**

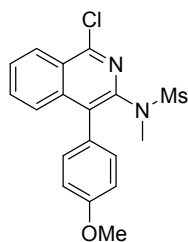

White solid, PE/EA (10:1) as the eluent, 21.4 mg, 57% yield, m.p. 156-157 °C. <sup>1</sup>H NMR (400 MHz, CDCl<sub>3</sub>) δ 8.41 – 8.34 (m, 1H), 7.74 – 7.61 (m, 3H), 7.44 – 7.33 (m, 2H), 7.09 – 6.99 (m, 2H), 3.90 (s, 3H), 3.22 (s, 3H), 3.01 (s, 3H). <sup>13</sup>C NMR (100 MHz, CDCl<sub>3</sub>) δ 159.59, 149.63, 145.11, 139.31, 131.74, 131.62, 131.48, 128.74, 126.79, 126.60, 126.45, 125.75, 114.02, 55.32, 38.50, 37.73. HRMS (ESI) *m/z*: Calcd for: C<sub>18</sub>H<sub>18</sub>ClN<sub>2</sub>O<sub>3</sub>S [M + H]<sup>+</sup> 377.0721, Found: 377.0720.

***N*-(1-chloro-4-(4-ethylphenyl)isoquinolin-3-yl)-*N*-methylmethanesulfonamide (3aj).**

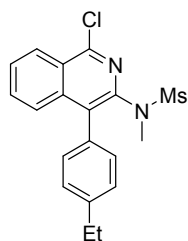

White solid, PE/EA (10:1) as the eluent, 29.5 mg, 79% yield, m.p. 141-142 °C. <sup>1</sup>H NMR (400 MHz, CDCl<sub>3</sub>) δ 8.38 (dt, *J* = 8.1, 1.3 Hz, 1H), 7.74 – 7.63 (m, 3H), 7.36 (s, 4H), 3.19 (s, 3H), 3.01 (s, 3H), 2.76 (q, *J* = 7.6 Hz, 2H), 1.33 (t, *J* = 7.6 Hz, 3H). <sup>13</sup>C NMR (100 MHz, CDCl<sub>3</sub>) δ 149.68, 144.96, 144.31, 139.20, 132.05, 131.46, 130.92, 130.31, 128.74, 127.99, 126.85, 126.56, 126.41, 38.49, 37.79, 28.69, 15.34. HRMS (ESI) *m/z*: Calcd for: C<sub>19</sub>H<sub>20</sub>ClN<sub>2</sub>O<sub>2</sub>S [M + H]<sup>+</sup> 375.0929, Found: 375.0923.

***N*-(4-(4-(*tert*-butyl)phenyl)-1-chloroisoquinolin-3-yl)-*N*-methylmethanesulfonamide (3ak).**

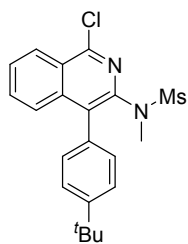

White solid, PE/EA (10:1) as the eluent, 31.4 mg, 78% yield, m.p. 81-82 °C. <sup>1</sup>H NMR (400 MHz, CDCl<sub>3</sub>) δ 8.38 (dt, *J* = 8.0, 1.4 Hz, 1H), 7.74 – 7.64 (m, 3H), 7.57 – 7.46 (m, 2H), 7.40 – 7.33 (m, 2H), 3.17 (s, 3H), 3.01 (s, 3H), 1.40 (s, 9H). <sup>13</sup>C NMR (100 MHz, CDCl<sub>3</sub>) δ 151.22, 149.63, 144.97, 139.23, 131.90, 131.43, 130.66, 130.06, 128.71, 126.89, 126.54, 126.40, 125.42, 38.55, 37.81, 34.76, 31.42. HRMS (ESI) *m/z*: Calcd for: C<sub>21</sub>H<sub>24</sub>ClN<sub>2</sub>O<sub>2</sub>S [M + H]<sup>+</sup> 403.1242, Found: 403.1251.

***N*-(1-chloro-4-(2-chlorophenyl)isoquinolin-3-yl)-*N*-methylmethanesulfonamide (3al).**

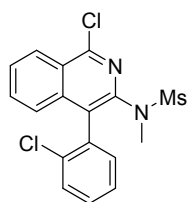

White solid, PE/EA (10:1) as the eluent, 22.4mg, 59% yield, m.p. 171-172 °C. <sup>1</sup>H NMR (400 MHz, CDCl<sub>3</sub>) δ 8.41 (dd, *J* = 8.4, 1.4 Hz, 1H), 7.75 – 7.67 (m, 2H), 7.58 – 7.52 (m, 2H), 7.49 – 7.43 (m, 2H), 7.41 – 7.36 (m, 1H), 3.18 (s, 3H), 3.12 (s, 3H). <sup>13</sup>C NMR (100 MHz, CDCl<sub>3</sub>) δ 150.79, 145.18, 138.55, 133.59, 133.28, 132.97, 131.93, 130.13, 129.66, 129.40, 129.01, 127.25, 126.67, 126.42, 126.24, 37.84, 37.38. HRMS (ESI) *m/z*: Calcd for: C<sub>17</sub>H<sub>15</sub>Cl<sub>2</sub>N<sub>2</sub>O<sub>2</sub>S [M + H]<sup>+</sup> 381.0226, Found: 381.0216.

***N*-(1-chloro-4-(2-methoxyphenyl)isoquinolin-3-yl)-*N*-methylmethanesulfonamide (3am).**

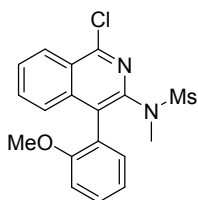

White solid, PE/EA (10:1) as the eluent, 22.9 mg, 61% yield, m.p. 154-155 °C. <sup>1</sup>H NMR (400 MHz, CDCl<sub>3</sub>) δ 8.40 – 8.31 (m, 1H), 7.70 – 7.61 (m, 2H), 7.53 – 7.43 (m, 2H), 7.36 (dd, *J* = 7.5, 1.8 Hz, 1H), 7.13 (td, *J* = 7.5, 1.0 Hz, 1H), 7.05 (dd, *J* = 8.4, 1.0 Hz, 1H), 3.70 (s, 3H), 3.15 (s, 3H), 3.06 (s, 3H). <sup>13</sup>C NMR (100 MHz, CDCl<sub>3</sub>) δ 156.92, 149.87, 145.47, 139.24, 132.53, 131.33, 130.11, 129.08, 128.59, 126.65, 126.43, 122.65, 120.98, 110.71, 55.33, 38.04, 37.37. HRMS (ESI) *m/z*: Calcd for: C<sub>18</sub>H<sub>17</sub>ClN<sub>2</sub>O<sub>3</sub>SNa [M + Na]<sup>+</sup> 399.0541, Found: 399.0549.

***N*-(1-chloro-4-(3-chlorophenyl)isoquinolin-3-yl)-*N*-methylmethanesulfonamide (3an).**

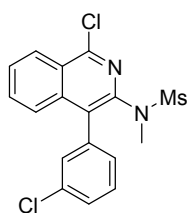

White solid, PE/EA (10:1) as the eluent, 31.5 mg, 83% yield, m.p. 161-162 °C. <sup>1</sup>H NMR (400 MHz, CDCl<sub>3</sub>) δ 8.44 – 8.37 (m, 1H), 7.76 – 7.69 (m, 2H), 7.62 – 7.55 (m, 1H), 7.50 – 7.45 (m, 2H), 7.43 – 7.37 (m, 2H), 3.20 (s, 3H), 3.05 (s, 3H). <sup>13</sup>C NMR (100 MHz, CDCl<sub>3</sub>) δ 150.59, 144.88, 138.73, 135.72, 134.29, 131.93, 130.88, 130.20, 129.93, 129.07, 128.87, 128.62, 126.62, 126.58, 126.44, 38.10, 37.96. HRMS (ESI) *m/z*: Calcd for: C<sub>17</sub>H<sub>14</sub>Cl<sub>2</sub>N<sub>2</sub>O<sub>2</sub>SNa [M + Na]<sup>+</sup> 403.0045, Found: 403.0039.

***N*-(1-chloro-4-(3-methoxyphenyl)isoquinolin-3-yl)-*N*-methylmethanesulfonamide (3ao).**



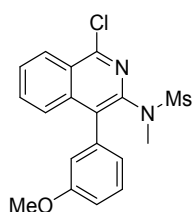

White solid, PE/EA (10:1) as the eluent, 19.9 mg, 53% yield, m.p. 151-152 °C. <sup>1</sup>H NMR (400 MHz, CDCl<sub>3</sub>) δ 8.39 (dt, *J* = 7.9, 1.5 Hz, 1H), 7.82 – 7.62 (m, 3H), 7.42 (dd, *J* = 8.3, 7.5 Hz, 1H), 7.10 – 6.90 (m, 3H), 3.85 (s, 3H), 3.22 (s, 3H), 3.01 (s, 3H). <sup>13</sup>C NMR (100 MHz, CDCl<sub>3</sub>) δ 159.64, 149.95, 144.82, 138.95, 135.03, 131.85, 131.59, 129.41, 128.85, 126.78, 126.56, 126.44, 122.68, 115.80, 114.44, 55.42, 38.53, 37.81. HRMS (ESI) *m/z*: Calcd for: C<sub>18</sub>H<sub>17</sub>ClN<sub>2</sub>O<sub>3</sub>SNa [M + Na]<sup>+</sup> 399.0541, Found: 399.0548.

***N*-(1-chloro-4-(naphthalen-2-yl)isoquinolin-3-yl)-*N*-methylmethanesulfonamide (3ap).**

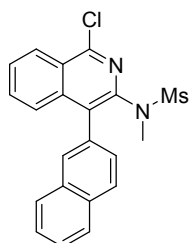

White solid, PE/EA (10:1) as the eluent, 30.5 mg, 77% yield, m.p. 186-187 °C. <sup>1</sup>H NMR (400 MHz, CDCl<sub>3</sub>) δ 8.42 (dt, *J* = 8.2, 1.0 Hz, 1H), 8.00 (d, *J* = 8.4 Hz, 1H), 7.97 – 7.88 (m, 3H), 7.74 – 7.70 (m, 1H), 7.67 – 7.64 (m, 2H), 7.62 – 7.49 (m, 3H), 3.21 (s, 3H), 3.00 (s, 3H). <sup>13</sup>C NMR (100 MHz, CDCl<sub>3</sub>) δ 150.07, 145.16, 139.17, 133.11, 133.02, 131.95, 131.66, 131.32, 129.65, 128.88, 128.27, 128.13, 127.90, 126.80, 126.67, 126.60, 126.52, 38.43, 37.88. HRMS (ESI) *m/z*: Calcd for: C<sub>21</sub>H<sub>17</sub>ClN<sub>2</sub>O<sub>2</sub>SNa [M + Na]<sup>+</sup> 419.0591, Found: 419.0562.

***N*-(1-chloro-4-(thiophen-2-yl)isoquinolin-3-yl)-*N*-methylmethanesulfonamide (3aq).**

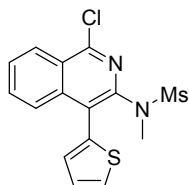

White solid, PE/EA (10:1) as the eluent, 12.3 mg, 35% yield, m.p. 214-215 °C. <sup>1</sup>H NMR (400 MHz, CDCl<sub>3</sub>) δ 8.43 – 8.34 (m, 1H), 7.95 – 7.85 (m, 1H), 7.79 – 7.70 (m, 2H), 7.56 (dd, *J* = 5.1, 1.2 Hz, 1H), 7.27 (dd, *J* = 3.6, 1.1 Hz, 1H), 7.22 (dd, *J* = 5.1, 3.5 Hz, 1H), 3.20 (s, 3H), 3.11 (s, 3H). <sup>13</sup>C NMR (100 MHz, CDCl<sub>3</sub>) δ 150.79, 145.86, 139.57, 133.32, 131.92, 130.42, 129.06, 127.62, 127.29, 126.64, 126.53, 126.48, 125.59, 38.22, 37.76. HRMS (ESI) *m/z*: Calcd for: C<sub>15</sub>H<sub>13</sub>ClN<sub>2</sub>O<sub>2</sub>S<sub>2</sub>Na [M + Na]<sup>+</sup> 374.9999, Found: 375.0002.

***N*-(1-chloro-4-(cyclohex-1-en-1-yl)isoquinolin-3-yl)-*N*-methylmethanesulfonamide (3ar).**

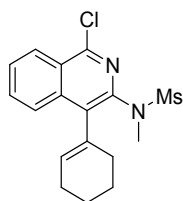

White solid, PE/EA (10:1) as the eluent, 28.0 mg, 80% yield, m.p. 188-189 °C. <sup>1</sup>H NMR (400 MHz, CDCl<sub>3</sub>) δ 8.32 (d, *J* = 8.2 Hz, 1H), 8.04 – 7.95 (m, 1H), 7.77 – 7.67 (m, 2H), 5.76 (t, *J* = 1.9 Hz, 1H), 3.28 (s, 3H), 3.26 (s, 3H), 2.58 (d, *J* = 17.1 Hz, 1H), 2.38 – 2.23 (m, 2H), 2.15 (d, *J* = 18.0 Hz, 1H), 1.84 (dt, *J* = 14.8, 9.5 Hz, 4H). <sup>13</sup>C NMR (100 MHz, CDCl<sub>3</sub>) δ 148.88, 144.23, 138.65, 134.63, 132.01, 131.33, 130.06, 128.69, 126.71, 126.49, 126.30, 38.70, 37.86, 29.79, 25.57, 22.95, 22.04. HRMS (ESI) *m/z*: Calcd for: C<sub>17</sub>H<sub>19</sub>ClN<sub>2</sub>O<sub>2</sub>SNa [M + Na]<sup>+</sup> 373.0748, Found: 373.0753.

***N*-(1-chloro-4-phenethylisoquinolin-3-yl)-*N*-methylmethanesulfonamide (3as).**

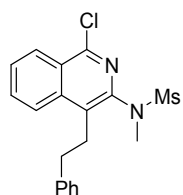

White solid, PE/EA (10:1) as the eluent, 11.6 mg, 31% yield, m.p. 143-144 °C. <sup>1</sup>H NMR (400 MHz, CDCl<sub>3</sub>) δ 8.38 (d, *J* = 8.4 Hz, 1H), 8.13 (d, *J* = 8.5 Hz, 1H), 7.83 – 7.81 (m, 1H), 7.75 – 7.71 (m, 1H), 7.29 (d, *J* = 7.8 Hz, 2H), 7.23 – 7.13 (m, 3H), 3.54 (s, 2H), 3.13 (s, 3H), 3.05 (s, 3H), 3.04 (s, 2H). <sup>13</sup>C NMR (100 MHz, CDCl<sub>3</sub>) δ 149.02, 145.29, 141.18, 138.37, 131.61, 131.30, 128.72, 128.61, 128.56, 127.22, 126.85, 126.28, 124.87, 37.99, 36.22, 36.17, 29.38. HRMS (ESI) *m/z*: Calcd for: C<sub>19</sub>H<sub>19</sub>ClN<sub>2</sub>O<sub>2</sub>SNa [M + Na]<sup>+</sup> 397.0748, Found: 397.0751.

***N*-(1-chloro-4-phenylisoquinolin-3-yl)-*N*,4-dimethylbenzenesulfonamide (3at).**

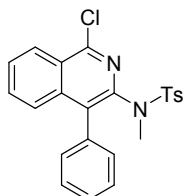

White solid, PE/EA (10:1) as the eluent, 33.8 mg, 80% yield, m.p. 188-189 °C. <sup>1</sup>H NMR (400 MHz, CDCl<sub>3</sub>) δ 8.42 – 8.32 (m, 1H), 7.77 – 7.64 (m, 5H), 7.59 – 7.46 (m, 5H), 7.36 – 7.28 (m, 2H), 2.89 (s, 3H), 2.46 (s, 3H). <sup>13</sup>C NMR (100 MHz, CDCl<sub>3</sub>) δ 149.68, 144.87, 143.52, 139.02, 135.60, 134.19, 132.66, 131.40, 130.49, 129.22, 129.02, 128.73, 128.47, 128.26, 126.81, 126.55, 126.36, 37.46, 21.63. HRMS (ESI) *m/z*: Calcd for: C<sub>23</sub>H<sub>19</sub>ClN<sub>2</sub>O<sub>2</sub>SNa [M + Na]<sup>+</sup> 445.0748, Found: 445.0754.

***N*-(1-chloro-4-phenylisoquinolin-3-yl)-*N*-ethyl-4-methylbenzenesulfonamide (3au).**

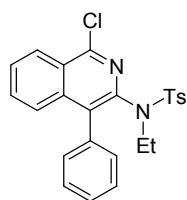

White solid, PE/EA (10:1) as the eluent, 38.4 mg, 88% yield, m.p. 206-207 °C. <sup>1</sup>H NMR (400 MHz, CDCl<sub>3</sub>) δ 8.43 – 8.33 (m, 1H), 7.76 – 7.57 (m, 5H), 7.56 – 7.47 (m, 5H), 7.31 (d, *J* = 8.2 Hz, 2H), 3.33 (d, *J* = 7.3 Hz, 2H), 2.45 (s, 3H), 0.79 (t, *J* = 7.2 Hz, 3H). <sup>13</sup>C NMR (100 MHz, CDCl<sub>3</sub>) δ 149.60, 143.47, 142.67, 139.16, 136.17, 134.25, 134.21, 131.36, 131.04, 129.17, 129.07, 128.76, 128.17, 127.05, 126.50, 126.29, 44.94, 21.61, 13.10. HRMS (ESI) *m/z*: Calcd for: C<sub>24</sub>H<sub>21</sub>ClN<sub>2</sub>O<sub>2</sub>SNa [M + Na]<sup>+</sup> 459.0904, Found: 459.0901.

***N*-butyl-*N*-(1-chloro-4-phenylisoquinolin-3-yl)-4-methylbenzenesulfonamide (3av).**

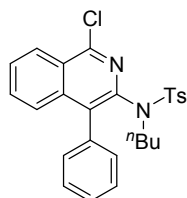

White solid, PE/EA (10:1) as the eluent, 42.7 mg, 92% yield, m.p. 143-144 °C. <sup>1</sup>H NMR (400 MHz, CDCl<sub>3</sub>) δ 8.41 (dd, *J* = 7.9, 1.5 Hz, 1H), 7.81 – 7.75 (m, 2H), 7.75 – 7.62 (m, 3H), 7.60 – 7.49 (m, 5H), 7.35 (d, *J* = 8.1 Hz, 2H), 3.56 – 2.97 (m, 2H), 2.49 (s, 3H), 1.18 – 1.08 (m, 2H), 0.99 (m, 2H), 0.69 (t, *J* = 7.3 Hz, 3H). <sup>13</sup>C NMR (100 MHz, CDCl<sub>3</sub>) δ 149.59, 143.46, 143.04, 139.18, 136.16, 134.15, 134.12, 131.33, 131.07, 129.16, 129.12, 128.73, 128.17, 128.15, 127.10, 126.51, 126.27, 50.13, 29.73, 21.62, 19.78, 13.59. HRMS (ESI) *m/z*: Calcd for: C<sub>26</sub>H<sub>25</sub>ClN<sub>2</sub>O<sub>2</sub>SNa [M + Na]<sup>+</sup> 487.1217, Found: 487.1207.

***N*-benzyl-*N*-(1-chloro-4-phenylisoquinolin-3-yl)-4-methylbenzenesulfonamide (3aw).**

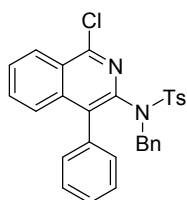

White solid, PE/EA (10:1) as the eluent, 24.9 mg, 50% yield, m.p. 153-154 °C. <sup>1</sup>H NMR (400 MHz, CDCl<sub>3</sub>) δ 8.36 (dd, *J* = 8.5, 1.2 Hz, 1H), 7.70 – 7.63 (m, 3H), 7.59 – 7.55 (m, 1H), 7.46 – 7.37 (m, 2H), 7.34 – 7.28 (m, 4H), 7.18 – 7.11 (m, 1H), 7.04 (dd, *J* = 8.3, 6.8 Hz, 2H), 6.91 – 6.75 (m, 4H), 4.48 (s, 2H), 2.47 (s, 3H). <sup>13</sup>C NMR (100 MHz, CDCl<sub>3</sub>) δ 149.43, 143.74, 142.40, 139.16, 135.84, 134.71, 133.70, 131.20, 130.94, 129.80, 129.28, 129.17, 128.72, 128.20, 127.69, 127.63, 127.17, 126.44, 126.22, 54.03, 21.66. HRMS (ESI) *m/z*: Calcd for: C<sub>29</sub>H<sub>23</sub>ClN<sub>2</sub>O<sub>2</sub>SNa [M + Na]<sup>+</sup> 521.1061, Found: 521.1051.

***N*-(1-chloro-4-(4-fluorophenyl)isoquinolin-3-yl)-*N*,4-dimethylbenzenesulfonamide (3ax).**

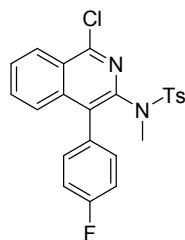

White solid, PE/EA (10:1) as the eluent, 34.8 mg, 79% yield, m.p. 174-175 °C. <sup>1</sup>H NMR (400 MHz, CDCl<sub>3</sub>) δ 8.42 – 8.31 (m, 1H), 7.78 – 7.66 (m, 4H), 7.65 – 7.58 (m, 1H), 7.51 – 7.44 (m, 2H), 7.37 – 7.31 (m, 2H), 7.27 (d, *J* = 1.9 Hz, 1H), 7.24 (d, *J* = 8.8 Hz, 1H), 2.90 (s, 3H), 2.47 (s, 3H). <sup>13</sup>C NMR (100 MHz, CDCl<sub>3</sub>) δ 162.76 (d, *J* = 247.8 Hz), 149.94, 145.08, 143.65, 139.01, 135.36, 132.30 (d, *J* = 8.0 Hz), 131.79, 131.57, 130.04 (d, *J* = 3.6 Hz), 129.25, 129.01, 128.84, 126.59, 126.47, 115.60 (d, *J* = 21.7 Hz), 37.47, 21.63. <sup>19</sup>F NMR (377 MHz, CDCl<sub>3</sub>) δ -113.48. HRMS (ESI) *m/z*: Calcd for: C<sub>23</sub>H<sub>18</sub>ClFN<sub>2</sub>O<sub>2</sub>SNa [M + Na]<sup>+</sup> 463.0654, Found: 463.0664.

***N*-(1-chloro-4-phenylisoquinolin-3-yl)-*N*-methylbenzenesulfonamide (3ay).**

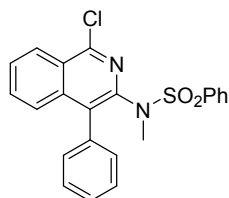

Colourless oil, PE/EA (10:1) as the eluent, 37.9 mg, 93% yield. <sup>1</sup>H NMR (400 MHz, CDCl<sub>3</sub>) δ 8.41 – 8.33 (m, 1H), 7.90 – 7.83 (m, 2H), 7.74 – 7.64 (m, 3H), 7.61 – 7.57 (m, 1H), 7.57 – 7.46 (m, 7H), 2.90 (s, 3H). <sup>13</sup>C NMR (100 MHz, CDCl<sub>3</sub>) δ 149.71, 144.74, 139.02, 138.61, 134.13, 132.75, 132.65, 131.45, 130.49, 128.95, 128.78, 128.57, 128.50, 128.31, 126.81, 126.58, 126.37, 37.55. HRMS (ESI) *m/z*: Calcd for: C<sub>22</sub>H<sub>17</sub>ClN<sub>2</sub>O<sub>2</sub>SNa [M + Na]<sup>+</sup> 431.0591, Found: 431.0587.

***N*-(1-chloro-6-methyl-4-phenylisoquinolin-3-yl)-*N*-methylmethanesulfonamide (3ba).**

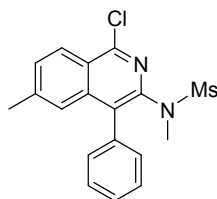

White solid, PE/EA (10:1) as the eluent, 28.8 mg, 80% yield, m.p. 226-227 °C. <sup>1</sup>H NMR (400 MHz, CDCl<sub>3</sub>) δ 8.27 (d, *J* = 8.6 Hz, 1H), 7.57 – 7.41 (m, 6H), 7.38 – 7.35 (m, 1H), 3.18 (s, 3H), 3.00 (s, 3H), 2.44 (s, 3H). <sup>13</sup>C NMR (100 MHz, CDCl<sub>3</sub>) δ 149.71, 145.00, 142.47, 139.28, 134.06, 131.47, 131.03, 130.40, 128.48, 128.24, 126.31, 125.60, 124.93, 38.39, 37.79, 22.13. HRMS (ESI) *m/z*: Calcd for: C<sub>18</sub>H<sub>17</sub>ClN<sub>2</sub>O<sub>2</sub>SNa [M + Na]<sup>+</sup> 383.0591, Found: 383.0599.

***N*-(1-chloro-7-methyl-4-phenylisoquinolin-3-yl)-*N*-methylmethanesulfonamide (3ca).**

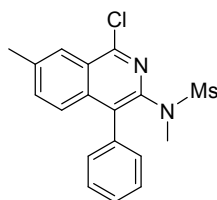

White solid, PE/EA (10:1) as the eluent, 30.6 mg, 85% yield, m.p. 216-217 °C. <sup>1</sup>H NMR (400 MHz, CDCl<sub>3</sub>) δ 8.15 (m, 1H), 7.54 – 7.41 (m, 7H), 3.17 (s, 3H), 3.00 (s, 3H), 2.58 (s, 3H). <sup>13</sup>C NMR (100 MHz, CDCl<sub>3</sub>) δ 149.12, 144.14, 139.30, 137.26, 134.01, 133.79, 131.94, 130.38, 128.45, 128.26, 126.73, 126.57, 125.27, 38.35, 37.83, 21.88. HRMS (ESI) *m/z*: Calcd for: C<sub>18</sub>H<sub>17</sub>ClN<sub>2</sub>O<sub>2</sub>SNa [M + Na]<sup>+</sup> 383.0591, Found: 383.0587.

***N*-(1,6-dichloro-4-phenylisoquinolin-3-yl)-*N*-methylmethanesulfonamide (3da).**

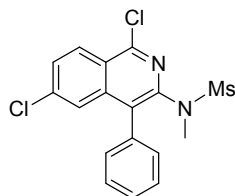

White solid, PE/EA (10:1) as the eluent, 20.9 mg, 55% yield, m.p. 229-230 °C. <sup>1</sup>H NMR (400 MHz, CDCl<sub>3</sub>) δ 8.33 (d, *J* = 9.0 Hz, 1H), 7.64 (dd, *J* = 8.9, 2.0 Hz, 1H), 7.59 (d, *J* = 2.1 Hz, 1H), 7.58 – 7.47 (m, 3H), 7.46 – 7.40 (m, 2H), 3.16 (s, 3H), 2.99 (s, 3H). <sup>13</sup>C NMR (100 MHz, CDCl<sub>3</sub>) δ 149.91, 146.08, 139.90, 138.57, 133.18, 131.12, 130.29, 129.82, 128.76, 128.67, 128.23, 125.57, 124.85, 38.54, 37.68. HRMS (ESI) *m/z*: Calcd for: C<sub>17</sub>H<sub>14</sub>Cl<sub>2</sub>N<sub>2</sub>O<sub>2</sub>SNa [M + Na]<sup>+</sup> 403.0045, Found: 403.0041.

***N*-(1,7-dichloro-4-phenylisoquinolin-3-yl)-*N*-methylmethanesulfonamide (3ea).**

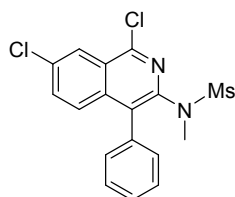

White solid, PE/EA (10:1) as the eluent, 28.1 mg, 74% yield, m.p. 196-197 °C. <sup>1</sup>H NMR (400 MHz, Chloroform-*d*) δ 8.36 (dd, *J* = 1.6, 1.0 Hz, 1H), 7.61 – 7.56 (m, 2H), 7.56 – 7.46 (m, 3H), 7.46 – 7.40 (m, 2H), 3.16 (s, 3H), 3.00 (s, 4H). <sup>13</sup>C NMR (101 MHz, CDCl<sub>3</sub>) δ 148.77, 145.28, 137.39, 135.12, 133.32, 132.54, 131.96, 130.31, 128.65, 128.61, 128.52, 127.26, 125.33, 38.45, 37.72. HRMS (ESI) *m/z*: Calcd for: C<sub>17</sub>H<sub>14</sub>Cl<sub>2</sub>N<sub>2</sub>O<sub>2</sub>SNa [M + Na]<sup>+</sup> 403.0045, Found: 403.0050.

***N*-(1-(benzylamino)-4-phenylisoquinolin-3-yl)-*N*-methylmethanesulfonamide (4a).**

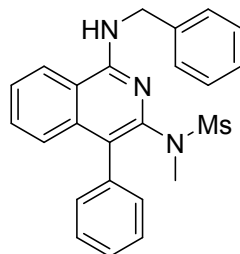

White solid, PE/EA (10:1) as the eluent, 26.3 mg, 63% yield, m.p. 212-213 °C. <sup>1</sup>H NMR (400 MHz, CDCl<sub>3</sub>) δ 7.81 (dd, *J* = 7.4, 1.5 Hz, 1H), 7.55 – 7.27 (m, 13H), 5.74 (t, *J* = 5.2 Hz, 1H), 4.80 (d, *J* = 5.3 Hz, 2H), 2.97 (s, 3H), 2.92 (s, 3H). <sup>13</sup>C NMR (100 MHz, CDCl<sub>3</sub>) δ 154.26, 144.95, 139.06, 138.49, 135.64, 131.12, 130.13, 128.78, 128.23, 127.56, 127.45, 127.31, 126.82, 126.31, 121.45, 121.25,

117.45, 46.09, 38.06, 37.54. HRMS (ESI)  $m/z$ : Calcd for:  $C_{24}H_{23}N_3O_2SNa$   $[M + Na]^+$  440.1403, Found: 440.1409.

***N*-(1,4-diphenylisoquinolin-3-yl)-*N*-methylmethanesulfonamide (4b).**

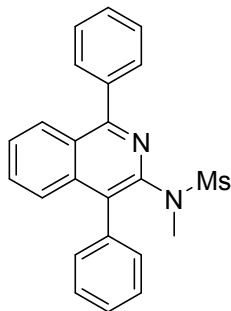

White solid, PE/EA (10:1) as the eluent, 22.9 mg, 59% yield, m.p. 171-172 °C.  $^1H$  NMR (400 MHz,  $CDCl_3$ )  $\delta$  8.19 (m,  $J = 8.3, 1.4, 0.7$  Hz, 1H), 7.78 – 7.73 (m, 2H), 7.69 (m,  $J = 8.4, 1.5, 0.8$  Hz, 1H), 7.63 – 7.48 (m, 10H), 3.23 (s, 3H), 3.02 (s, 3H).  $^{13}C$  NMR (100 MHz,  $CDCl_3$ )  $\delta$  159.98, 146.03, 138.97, 138.46, 134.76, 130.58, 130.41, 130.38, 130.15, 128.94, 128.45, 128.03, 127.58, 127.41, 126.43, 126.23, 38.80, 37.86. HRMS (ESI)  $m/z$ : Calcd for:  $C_{23}H_{20}N_2O_2SNa$   $[M + Na]^+$  411.1138, Found: 411.1139.

### 3. Computational Studies

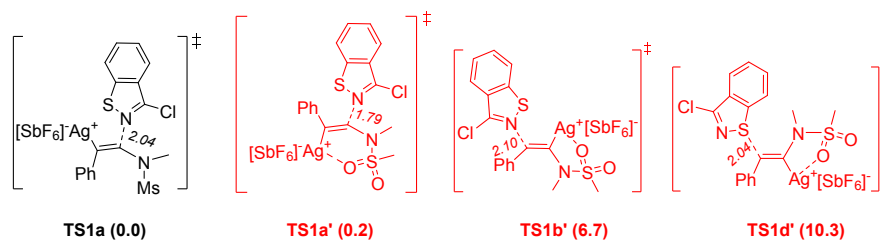

**Figure S1.** The other possible structural conformers of the transition states of nucleophilic addition of **1a**. The relative Gibbs energies (in kcal/mol) are given in parentheses.

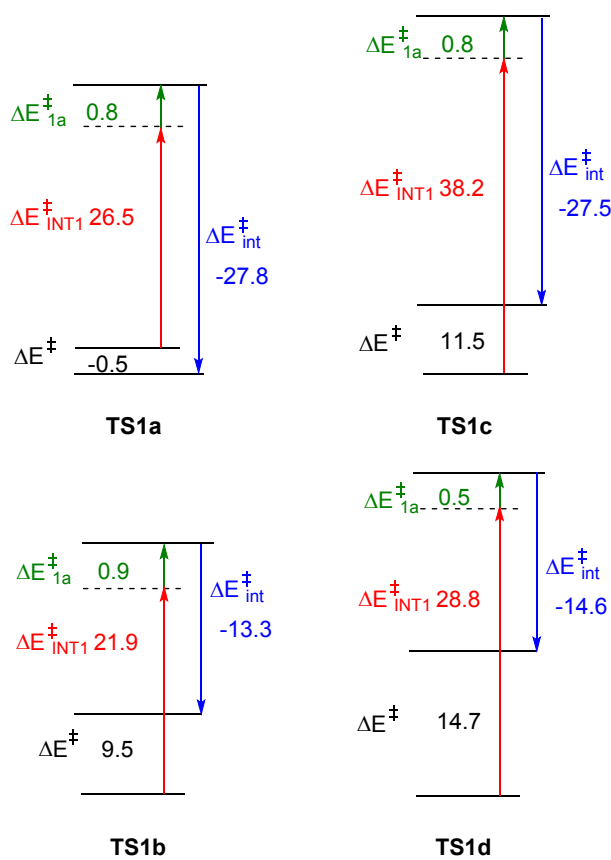

**Figure S2.** Distortion, interaction and activation energies for **TS1a** and **TS1c**, **TS1b** and **TS1d** (green arrow: distortion energy of substrate **1a**; red arrow: distortion energy of **INT1**; blue arrow: interaction energy; black: activation energy, in kcal/mol)

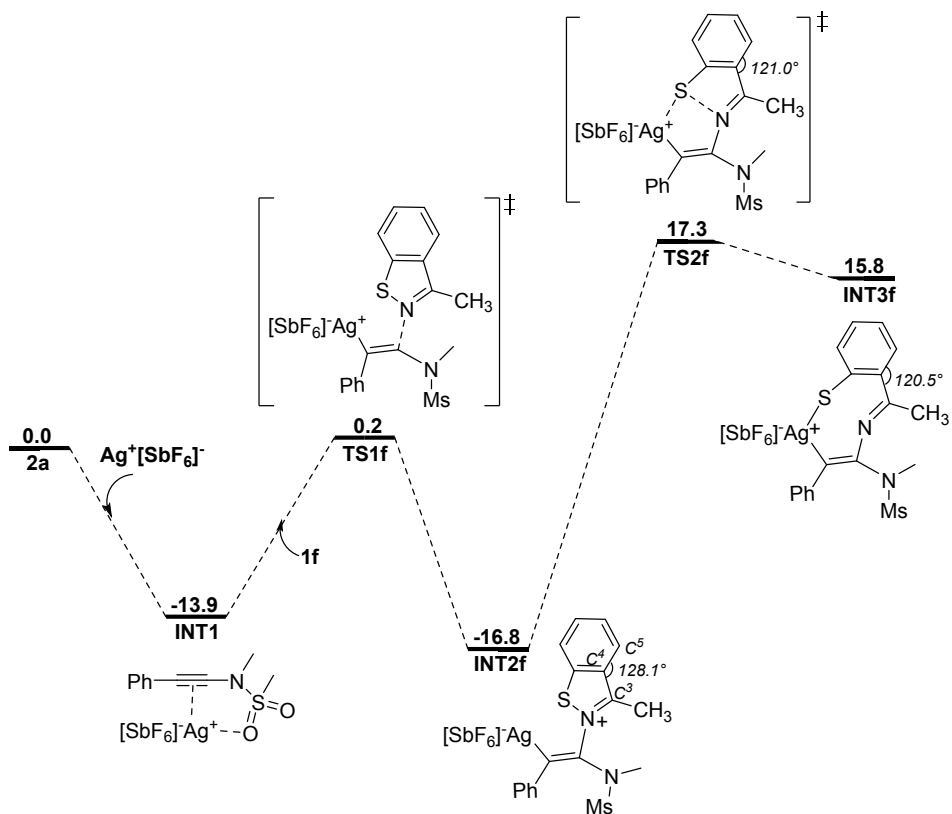

**Figure S3.** Energy profile (in kcal/mol) for the nucleophilic N-attack of **1f** with the silver-activated **2a** and subsequent S-N bond breaking.

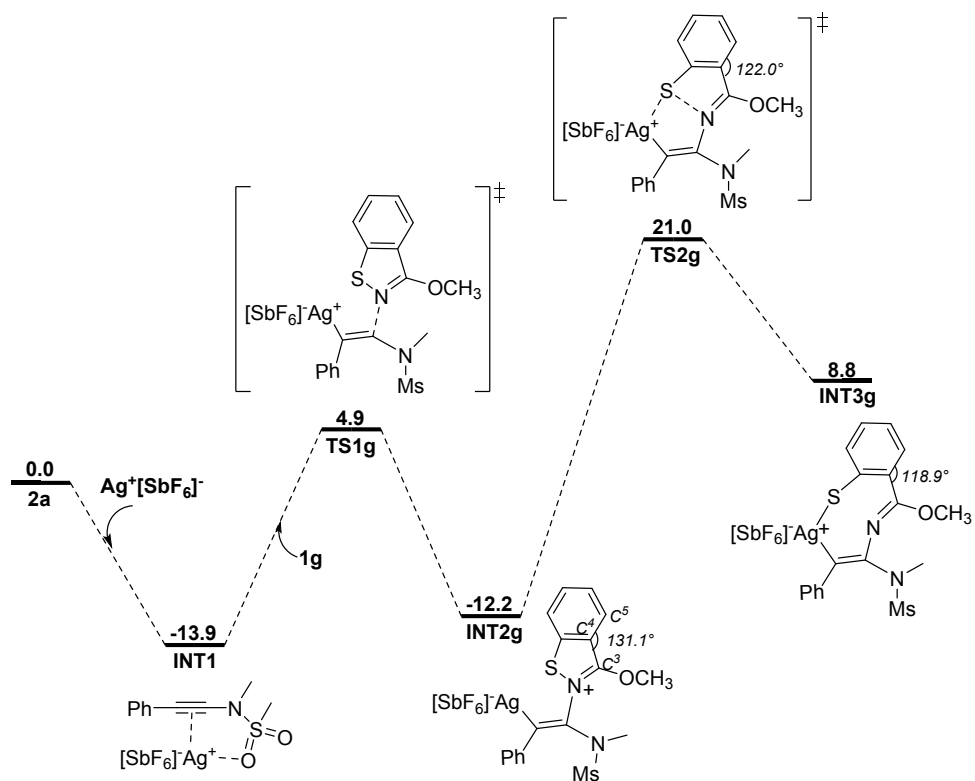

**Figure S4.** Energy profile (in kcal/mol) for the nucleophilic N-attack of **1g** with the silver-activated **2a** and subsequent S-N bond breaking.



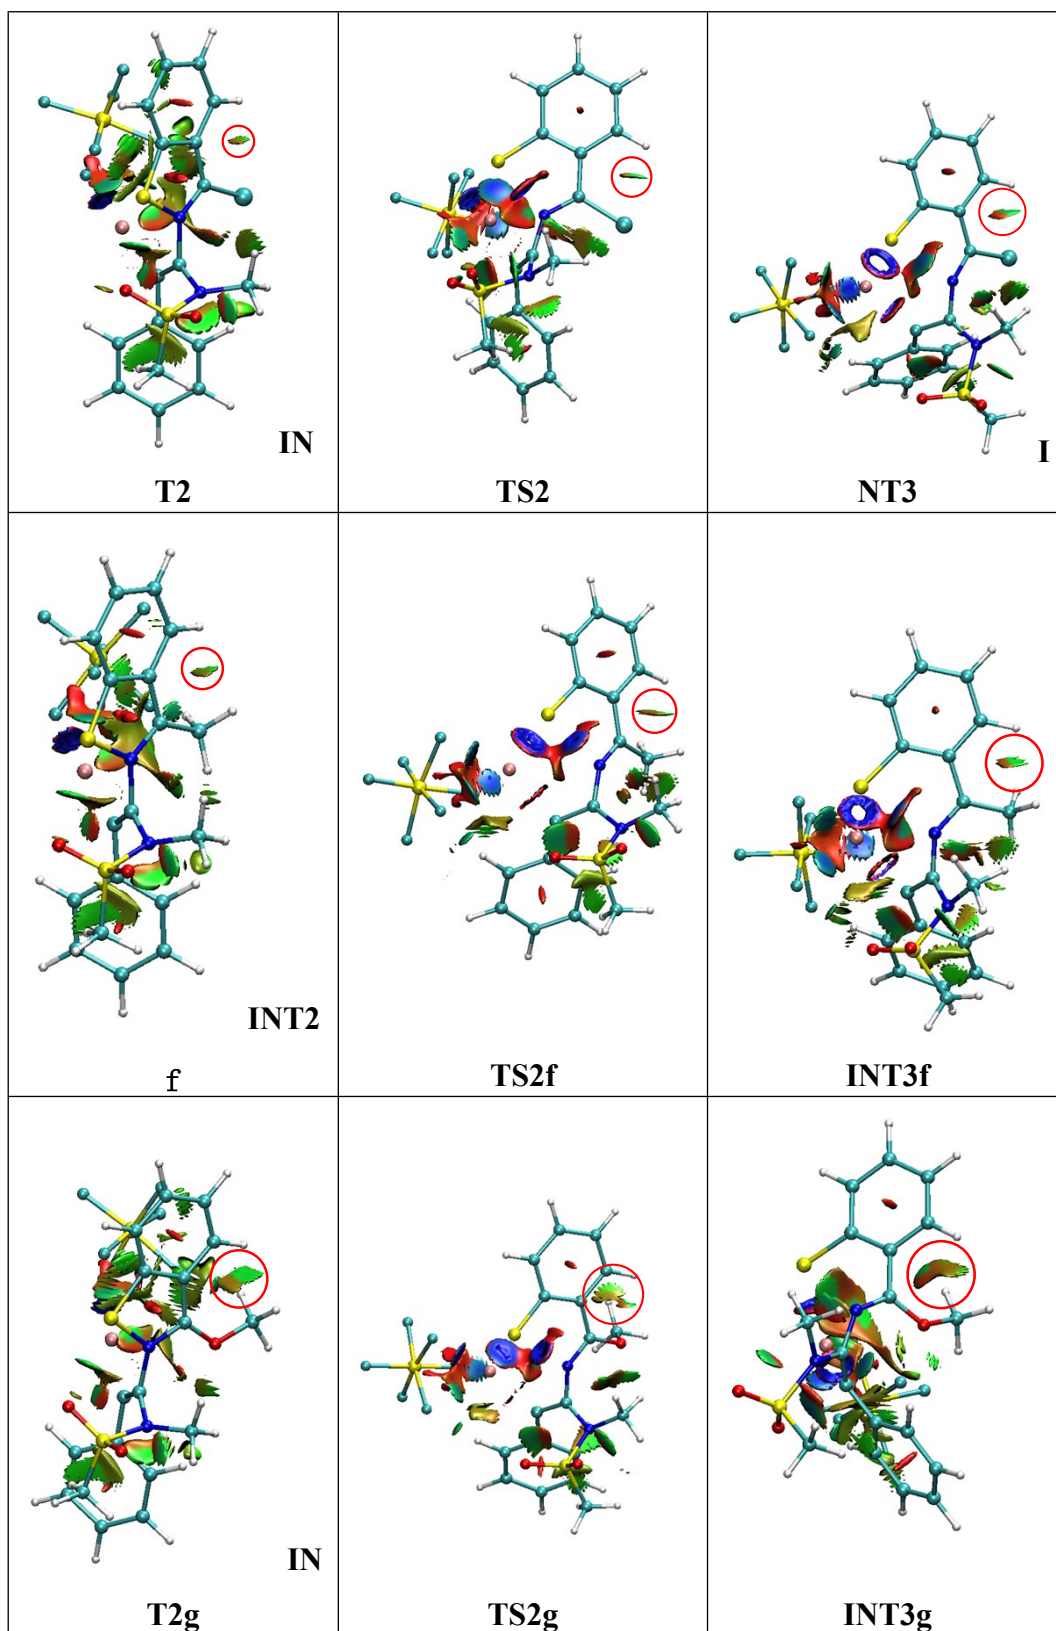

**Figure S5.** Non-covalent interaction analysis for the step of S-N bond cleavage for **INT2**, **INT2f**, and **INT2g**. The key steric repulsive interactions are highlighted by red circles (blue, attraction; green, weak interaction; red, steric effect).

#### 4. X-ray Crystallographic Data of 3aa

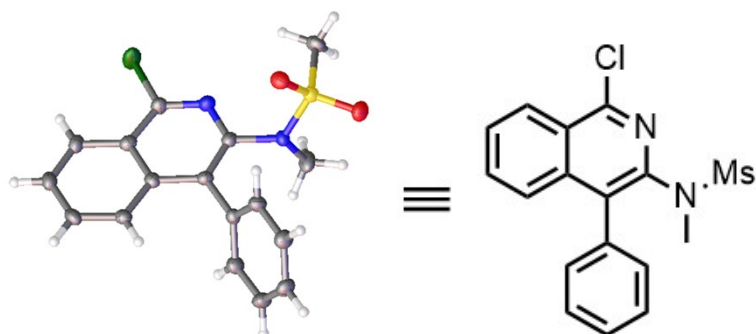

---

|                        |                                            |                                  |                         |
|------------------------|--------------------------------------------|----------------------------------|-------------------------|
| Bond precision:        | C-C = 0.0043 Å                             | Wavelength=0.71073               |                         |
| Cell:                  | a=31.7379(19)<br>alpha=90                  | b=6.9825(4)<br>beta=92.976(2)    | c=42.976(3)<br>gamma=90 |
| Temperature:           | 120 K                                      |                                  |                         |
|                        | Calculated                                 | Reported                         |                         |
| Volume                 | 9511.1(10)                                 | 9511.0(10)                       |                         |
| Space group            | P 21/c                                     | P 1 21/c 1                       |                         |
| Hall group             | -P 2ybc                                    | -P 2ybc                          |                         |
| Moiety formula         | C17 H15 Cl N2 O2 S                         | 6(C17 H15 Cl N2 O2 S)            |                         |
| Sum formula            | C17 H15 Cl N2 O2 S                         | C102 H90 Cl6 N12 O12 S6          |                         |
| Mr                     | 346.82                                     | 2080.91                          |                         |
| Dx, g cm <sup>-3</sup> | 1.453                                      | 1.453                            |                         |
| Z                      | 24                                         | 4                                |                         |
| Mu (mm <sup>-1</sup> ) | 0.383                                      | 0.383                            |                         |
| F000                   | 4320.0                                     | 4320.0                           |                         |
| F000'                  | 4328.08                                    |                                  |                         |
| h, k, lmax             | 41, 9, 55                                  | 41, 9, 55                        |                         |
| Nref                   | 21890                                      | 21857                            |                         |
| Tmin, Tmax             |                                            | 0.586, 0.746                     |                         |
| Tmin'                  |                                            |                                  |                         |
| Correction method=     | # Reported T Limits: Tmin=0.586 Tmax=0.746 |                                  |                         |
| AbsCorr =              | NONE                                       |                                  |                         |
| Data completeness=     | 0.998                                      | Theta(max)= 27.538               |                         |
| R(reflections)=        | 0.0564( 13144)                             | wR2(reflections)= 0.1591( 21857) |                         |
| S =                    | 1.051                                      | Npar= 1255                       |                         |

---

## 5. X-ray diffraction analysis of S<sub>8</sub>

Elemental sulfur was isolated by column chromatography (PE/EA, 10:1) as pale-yellow solid,  $R_f = 0.95$  (PE/EA, 10:1).

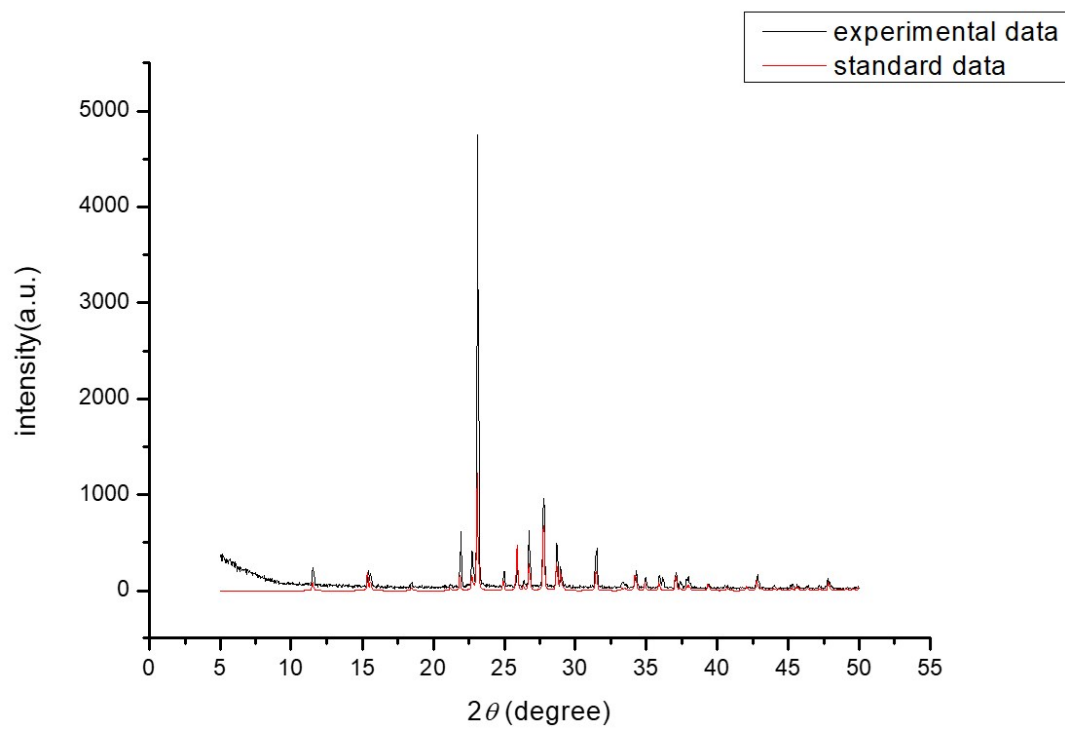

**Figure S6.** X-ray diffraction spectrum of isolated elemental sulfur.

## 6. NMR Spectra

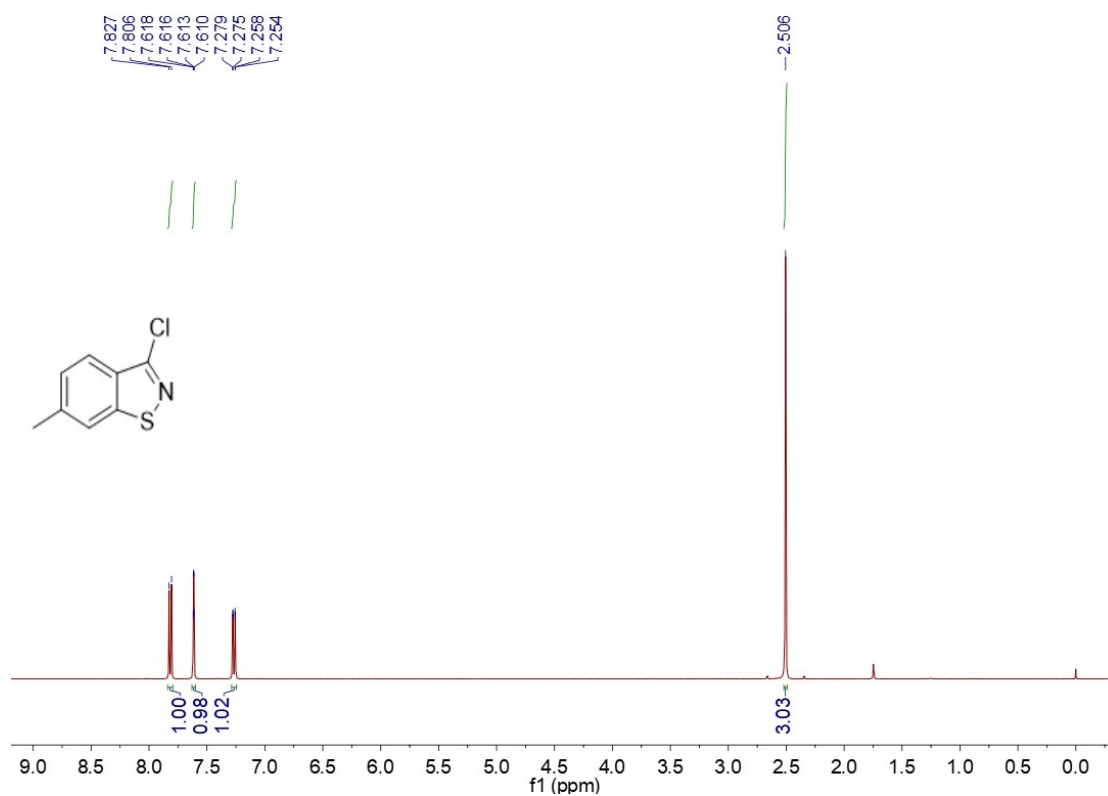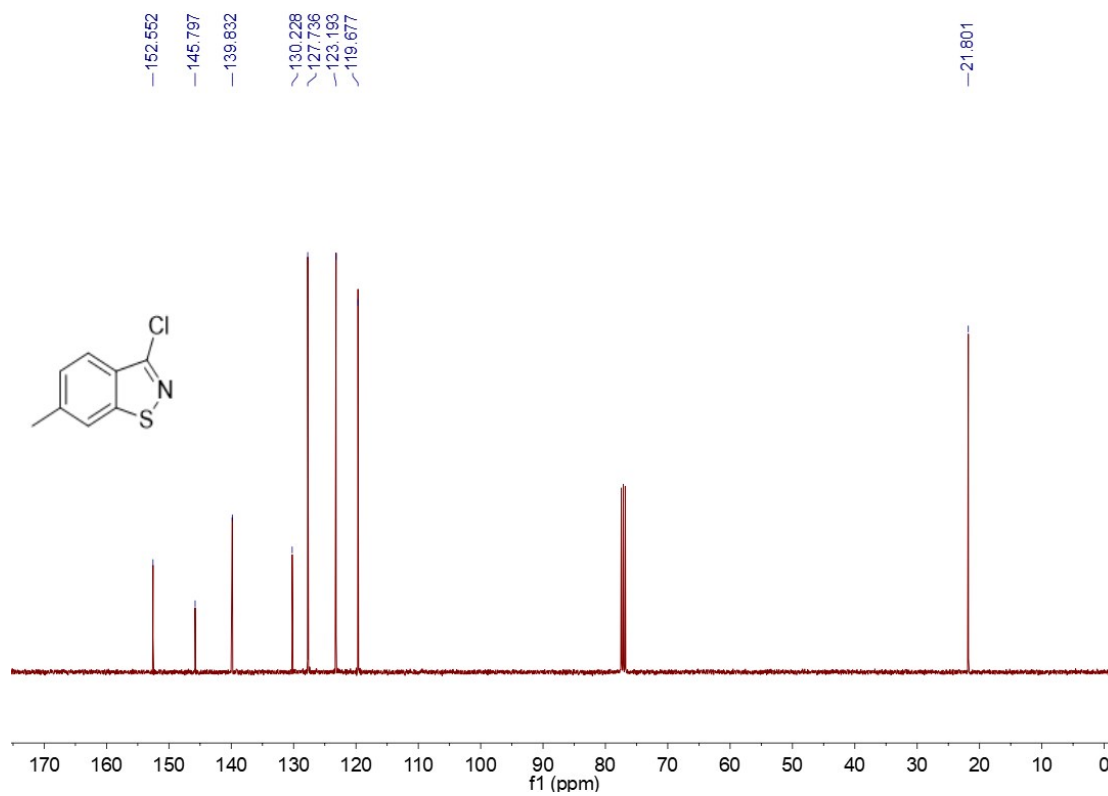

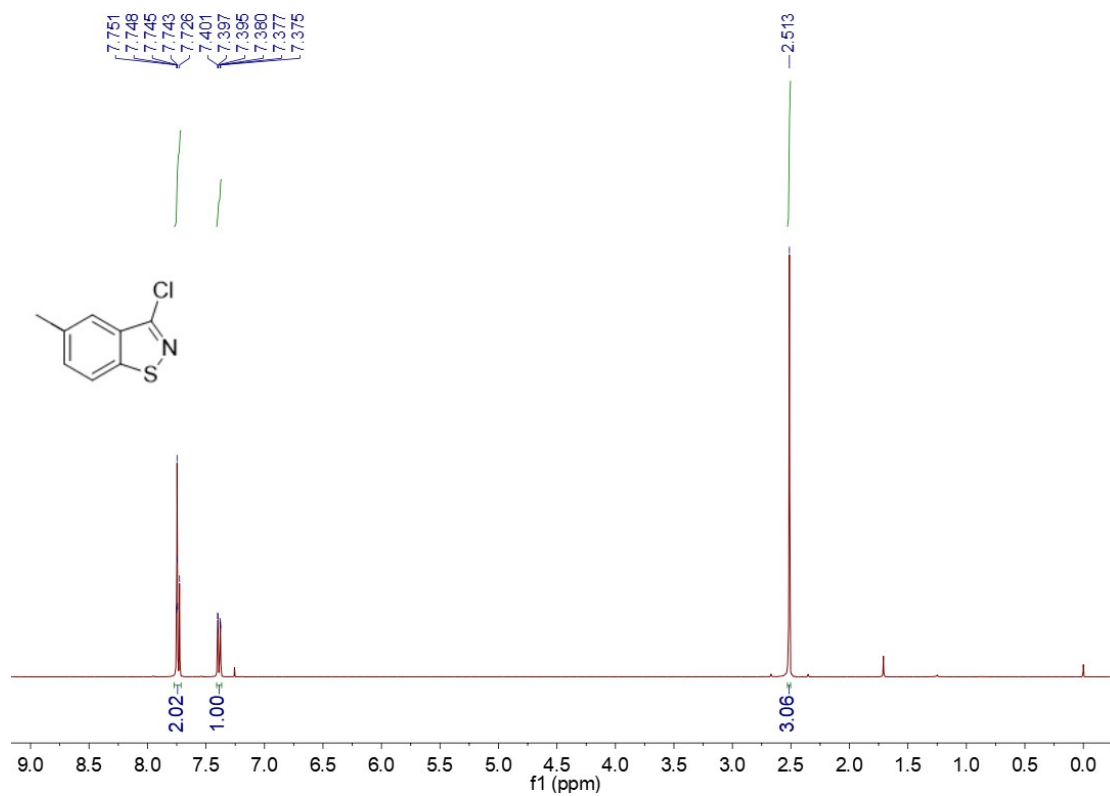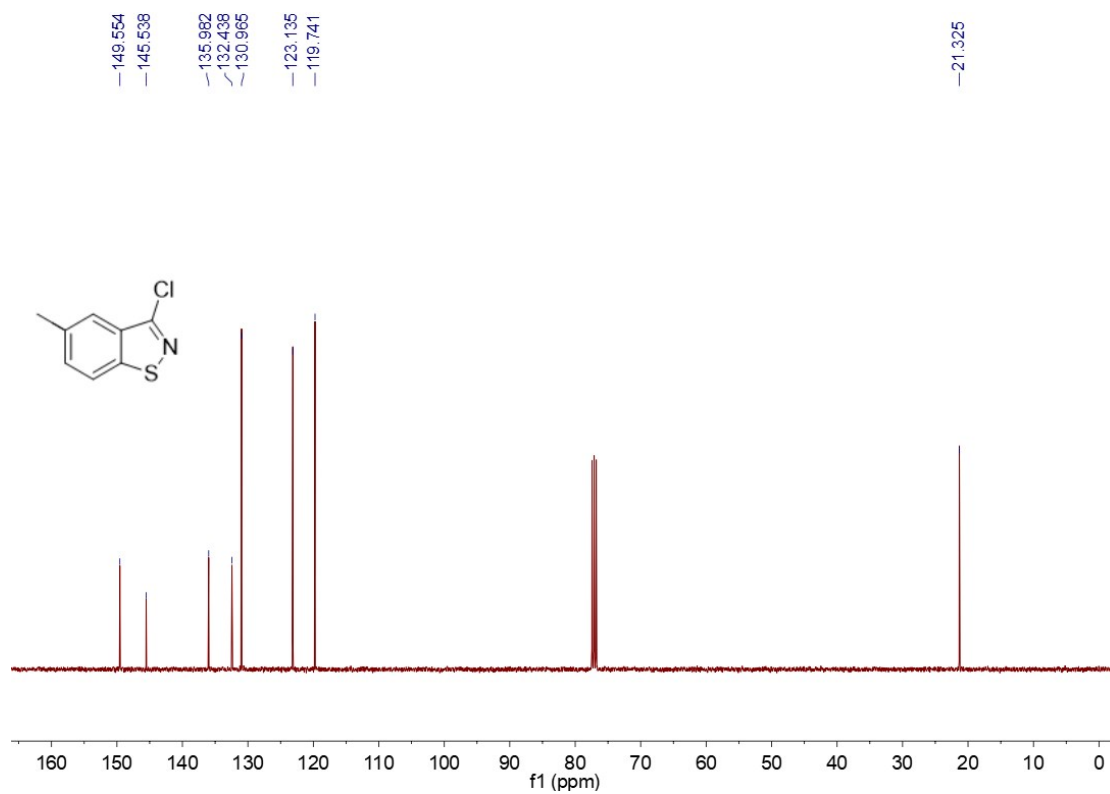

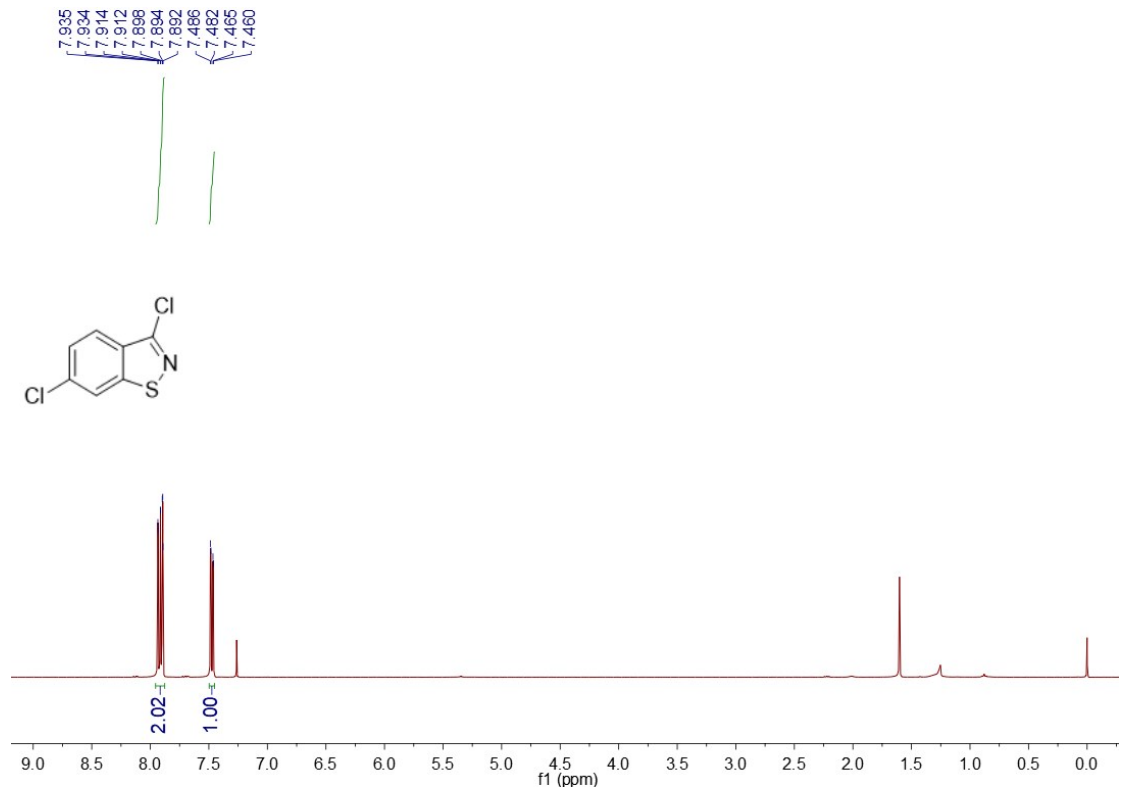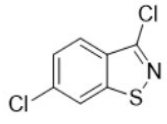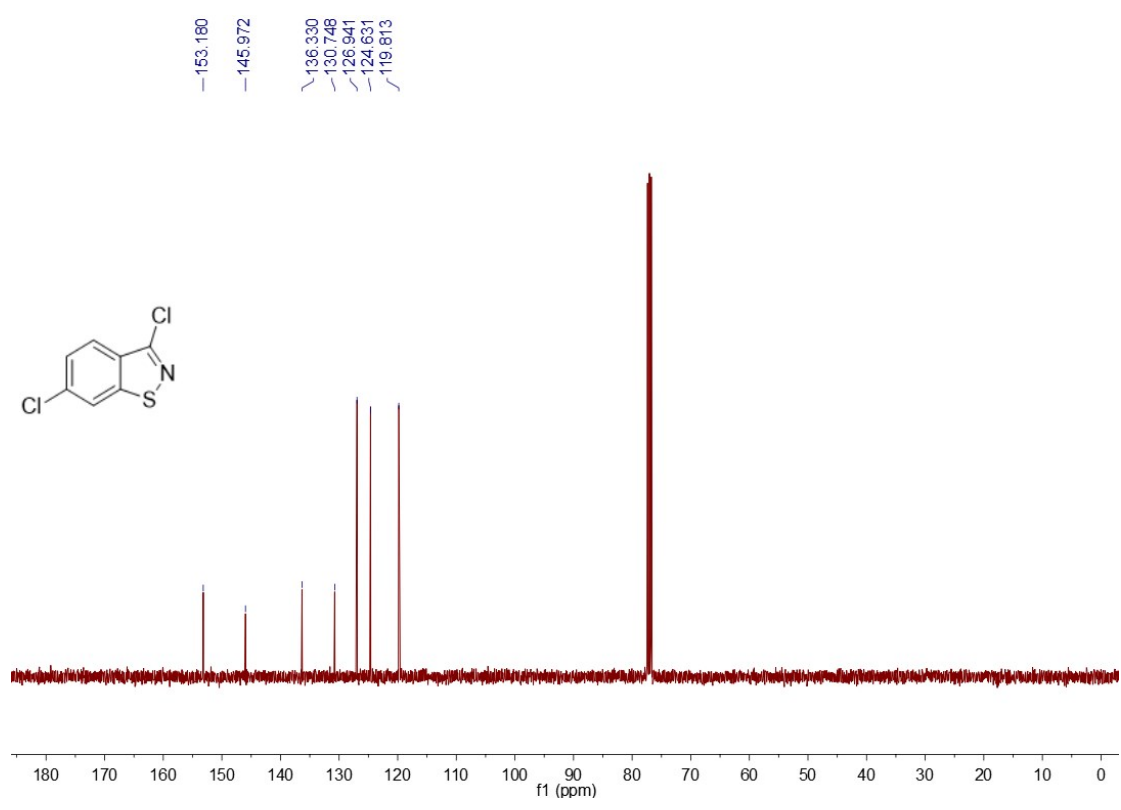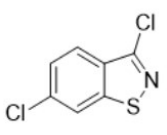

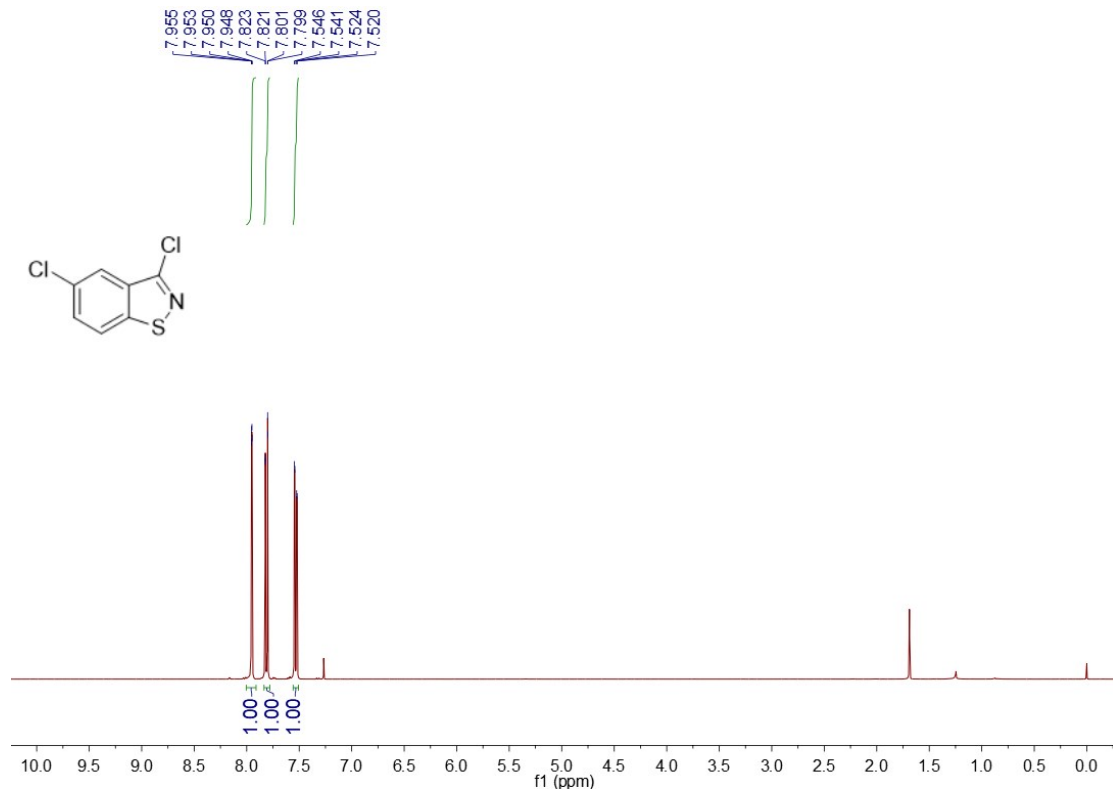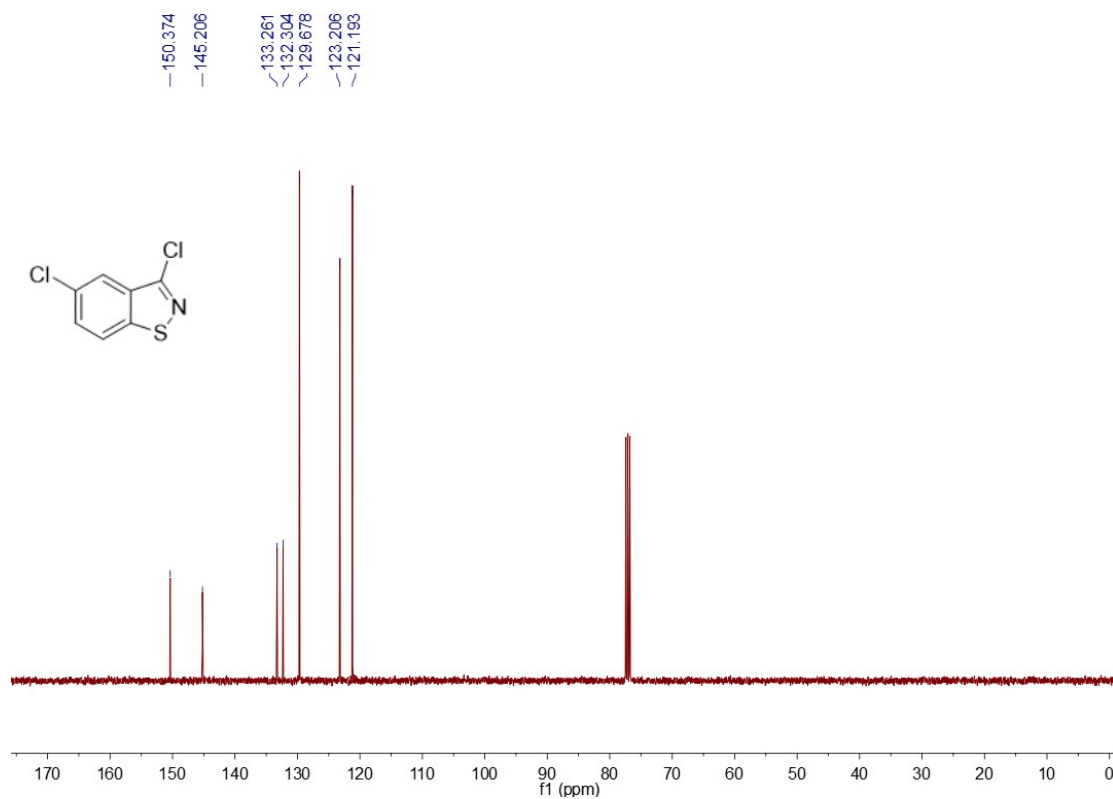

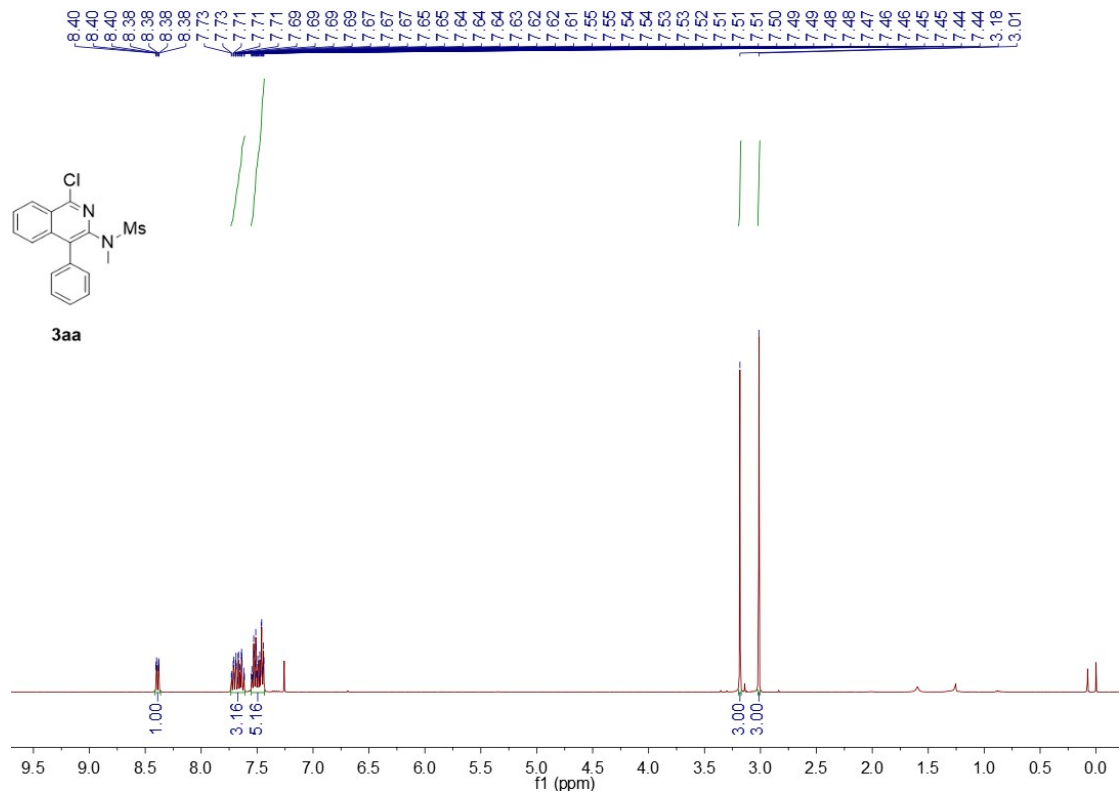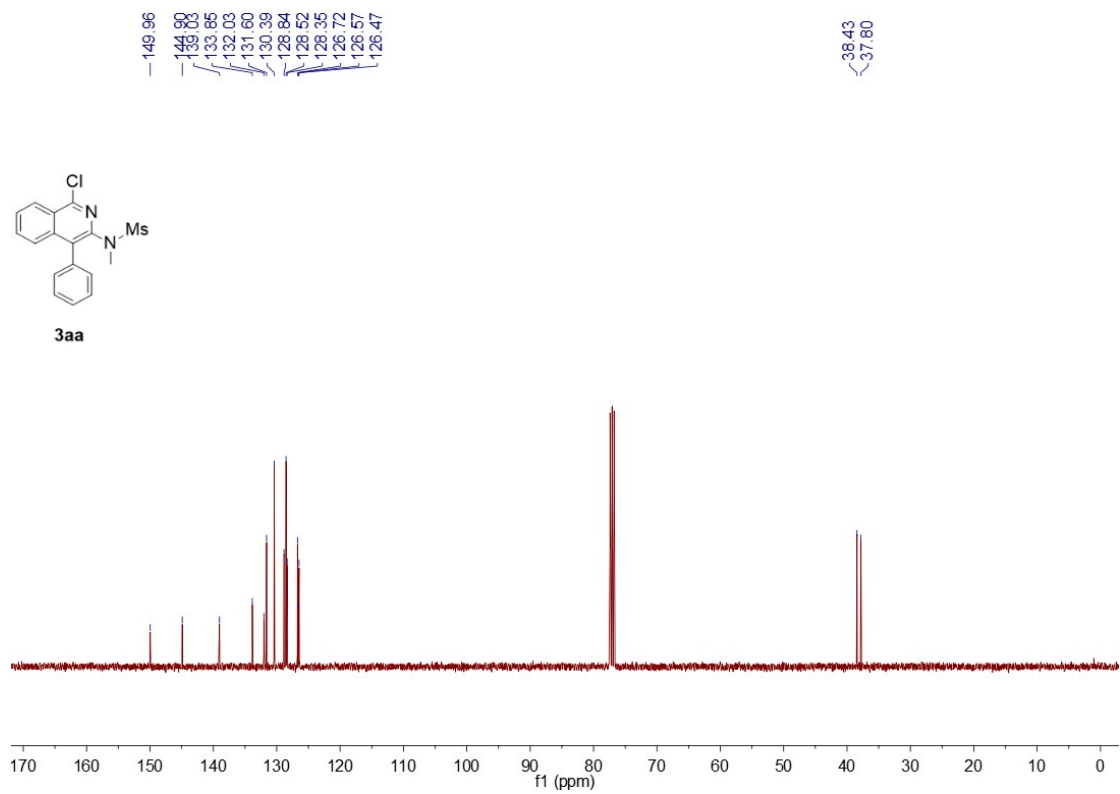



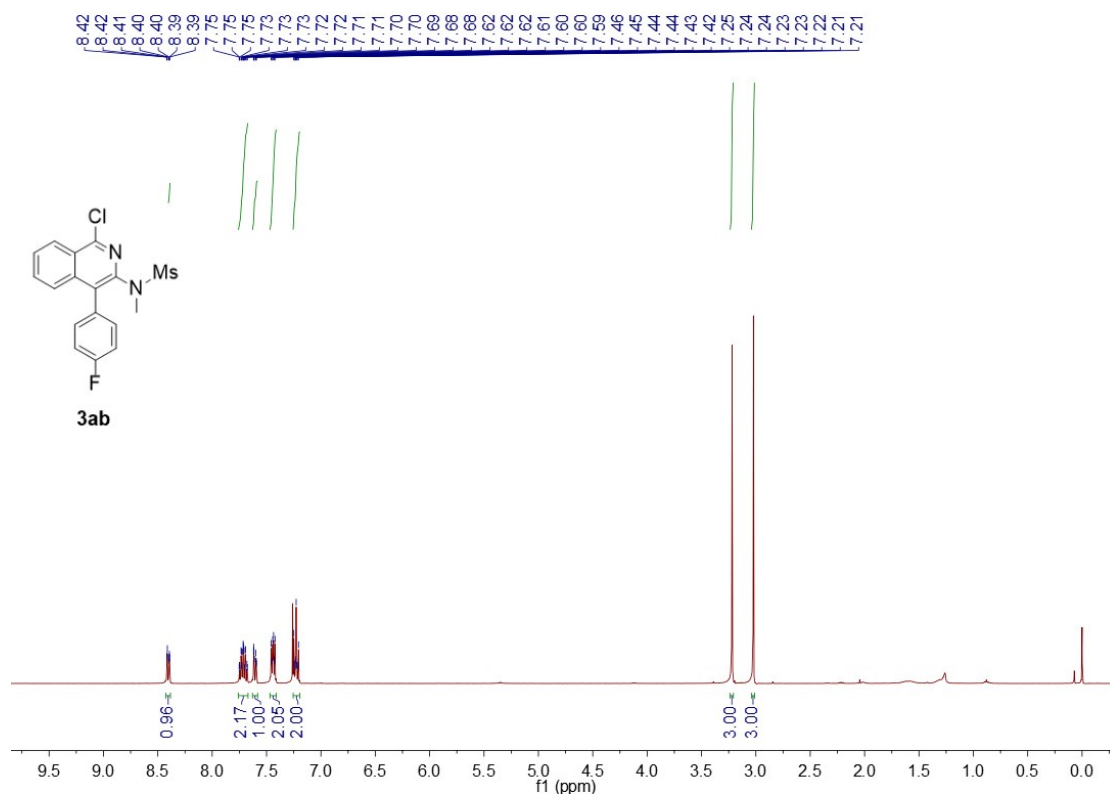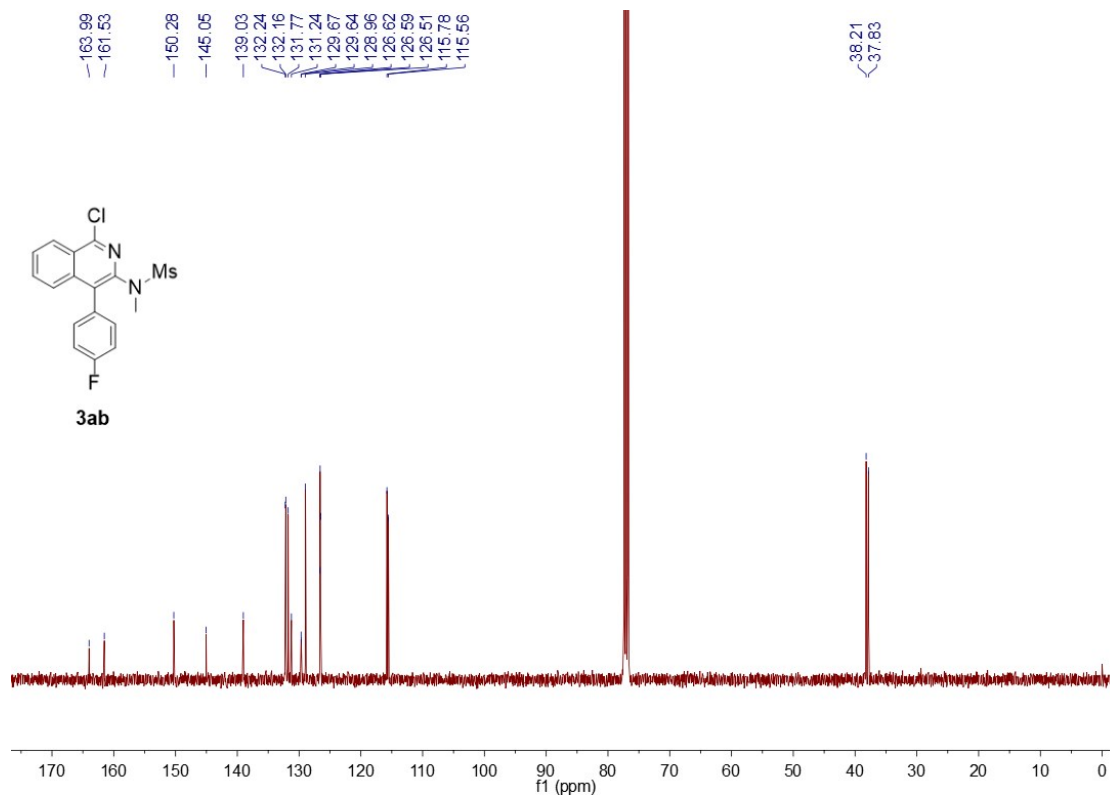

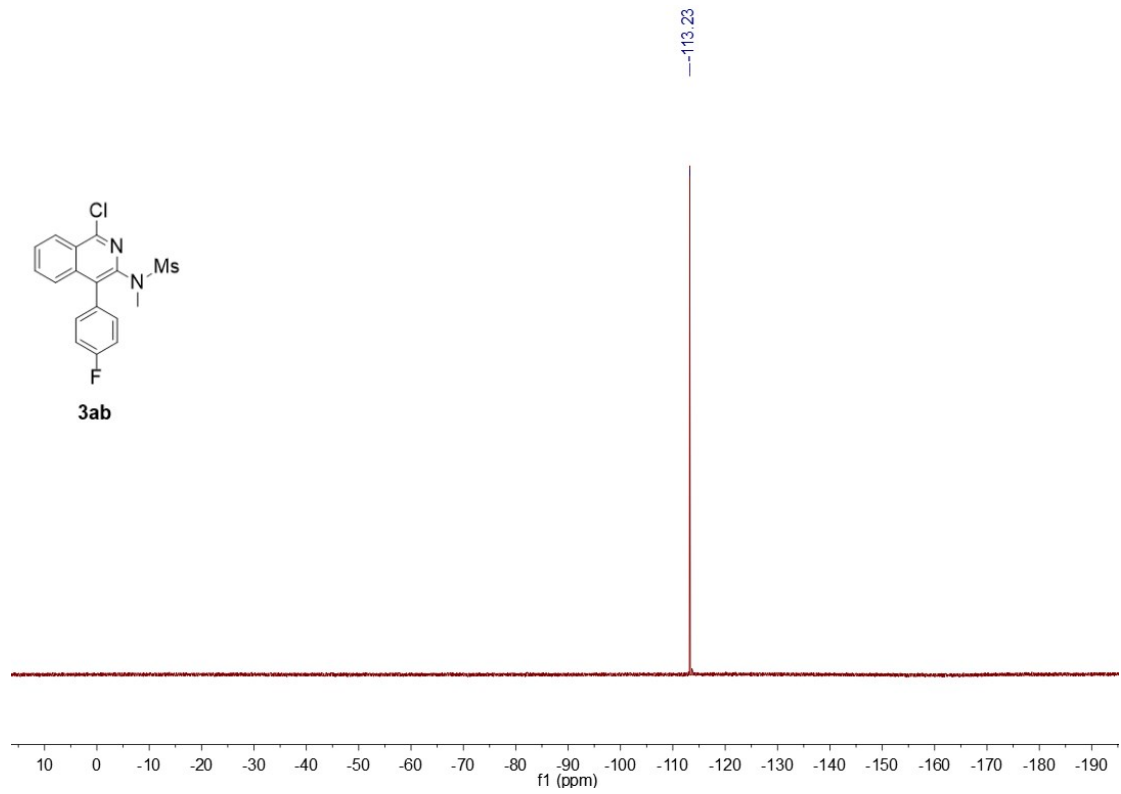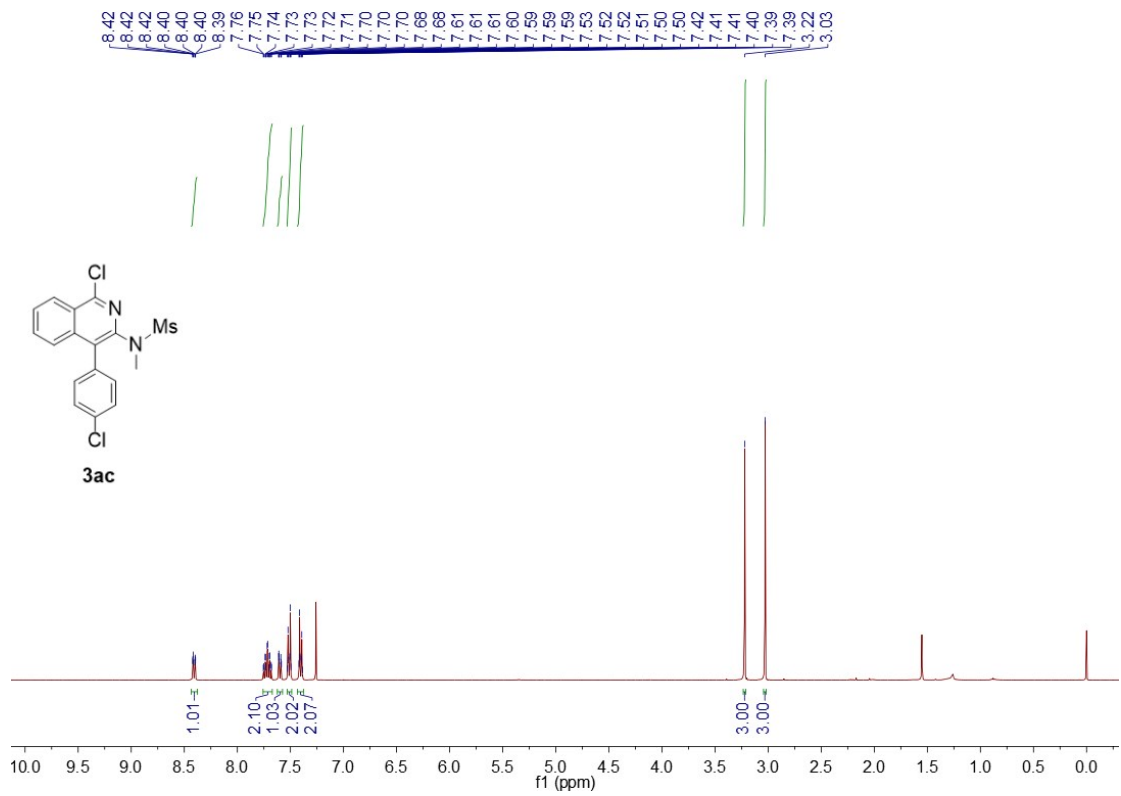

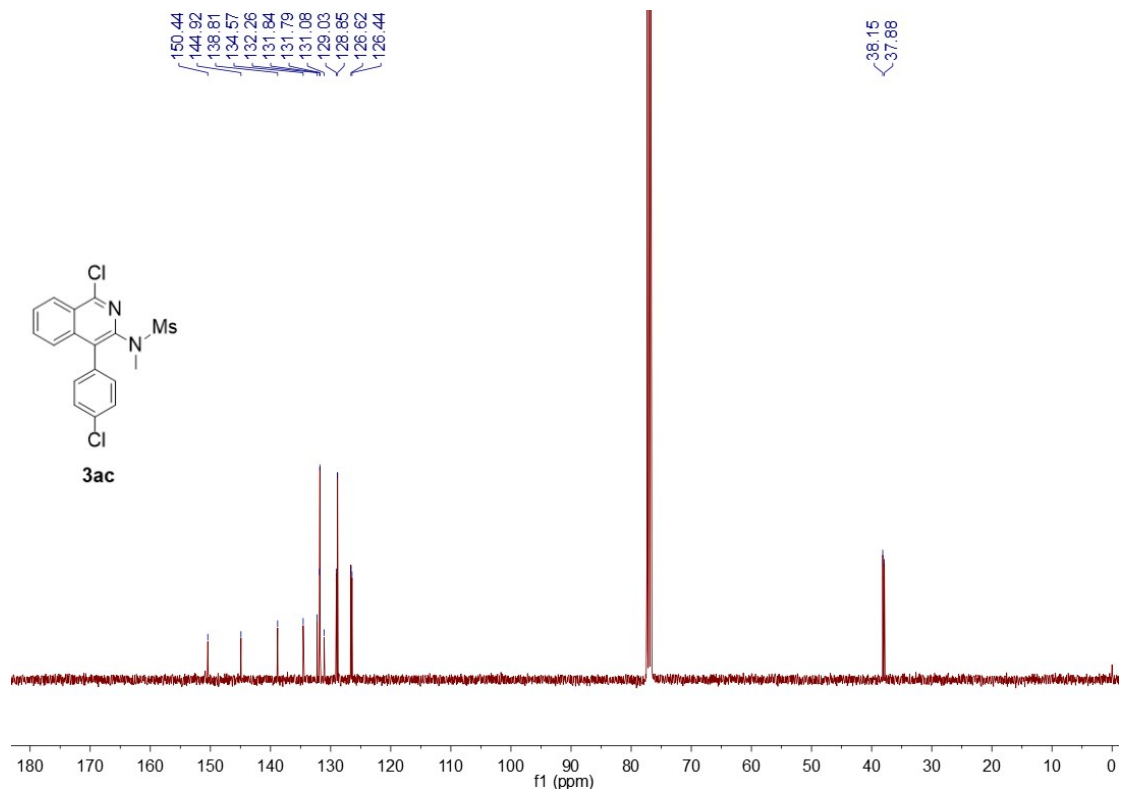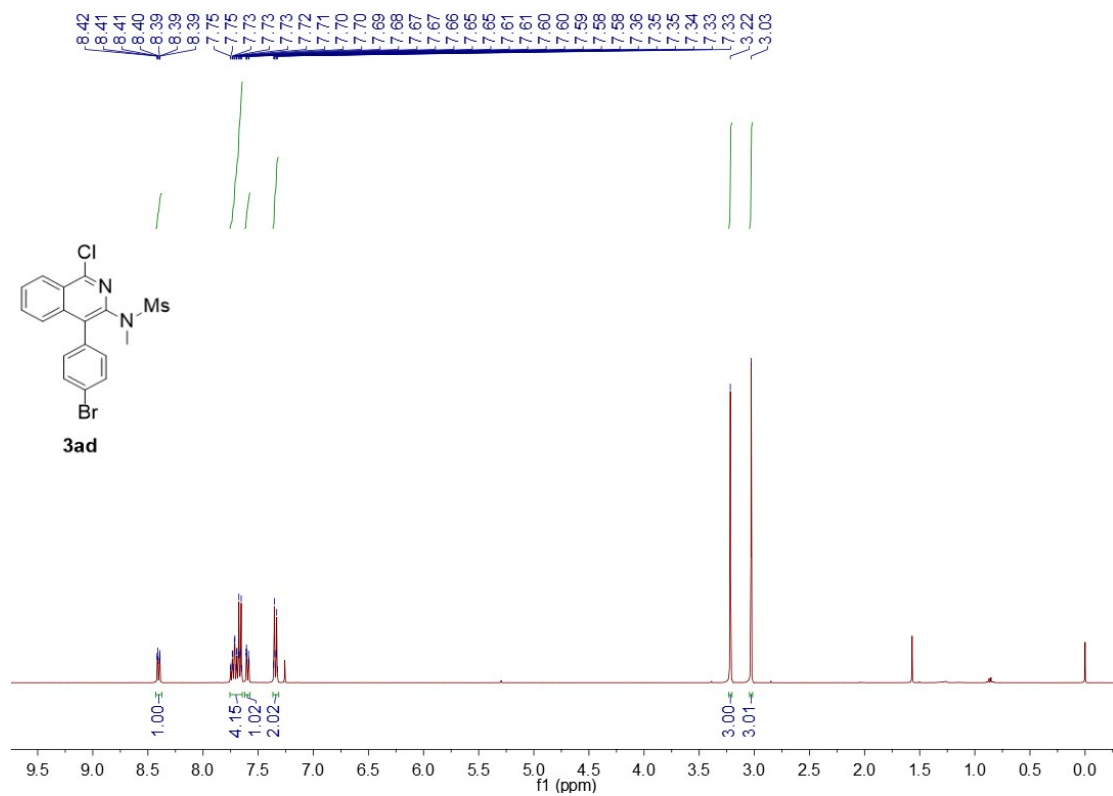

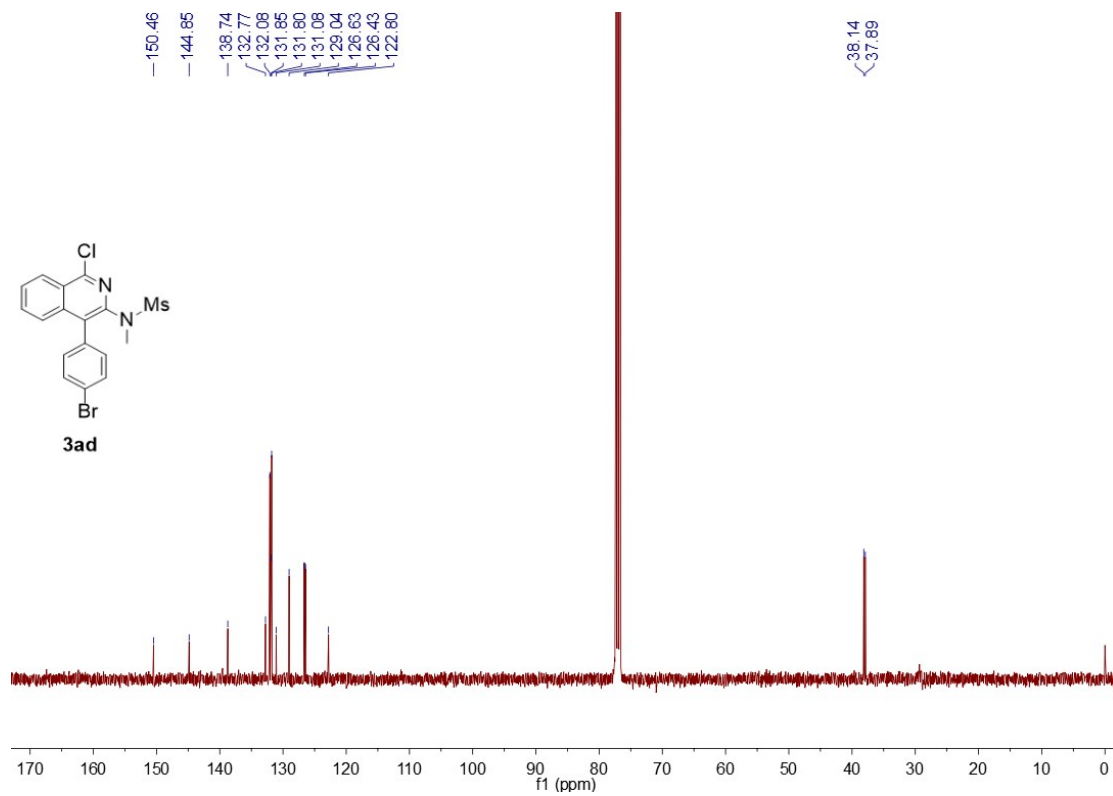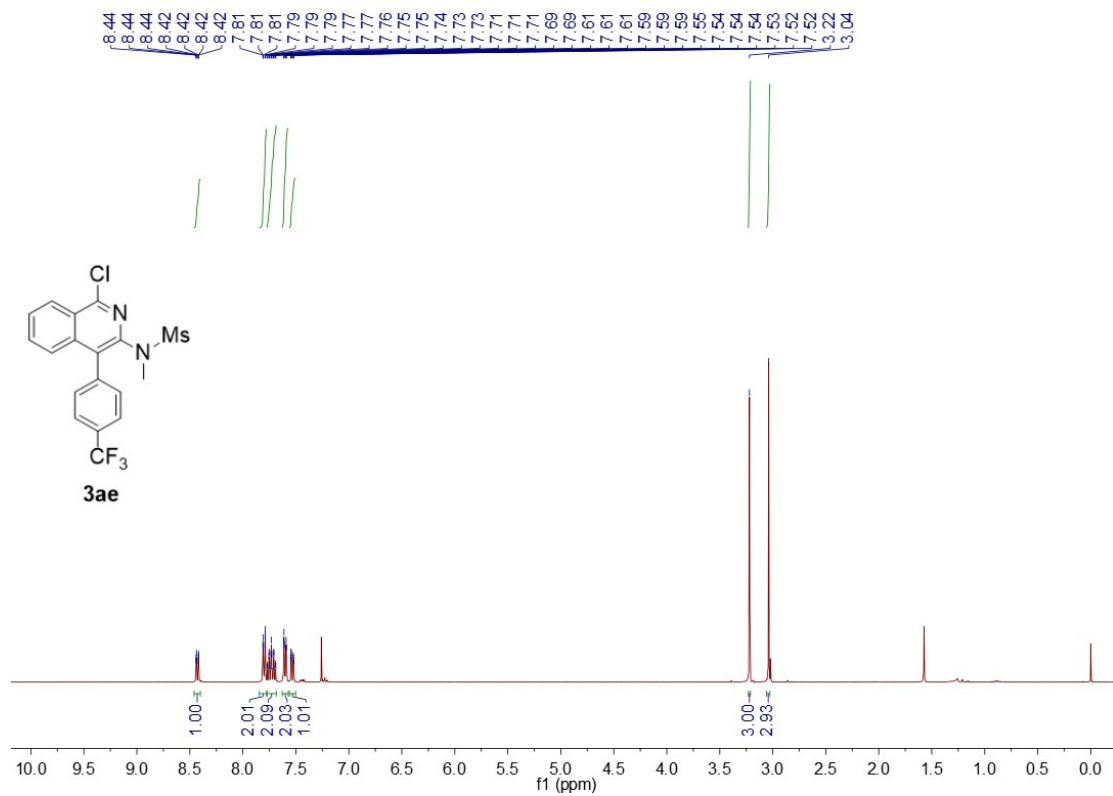

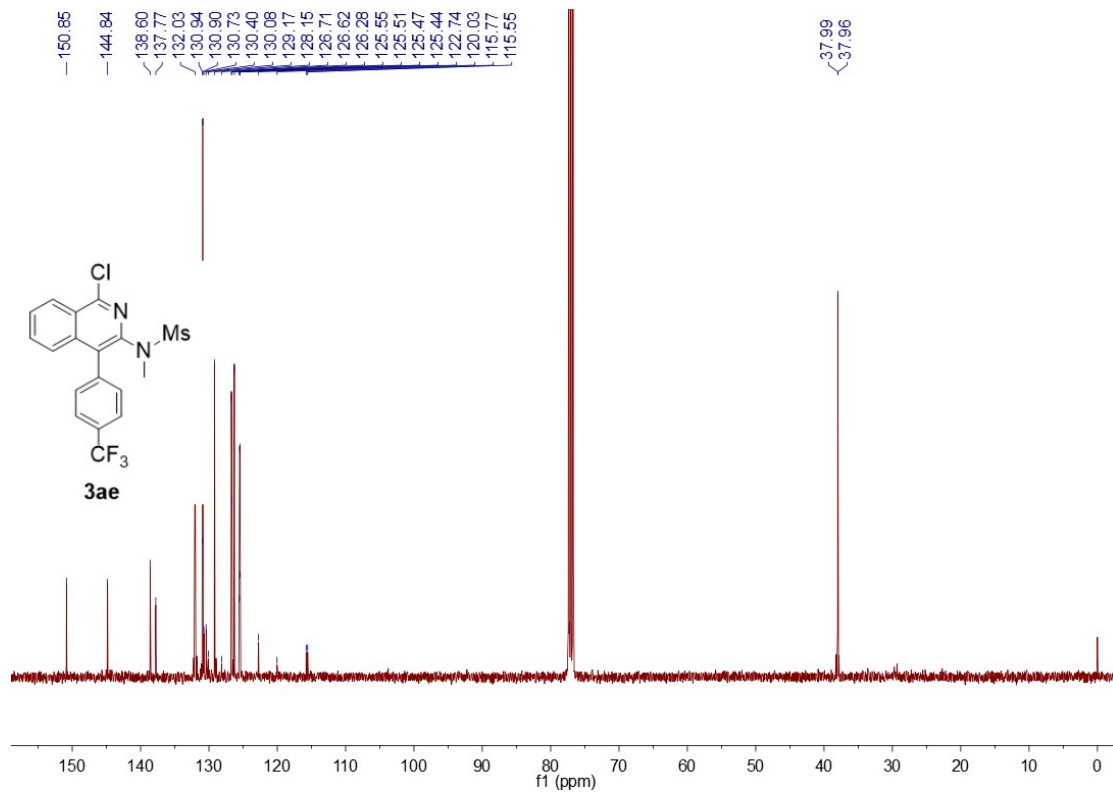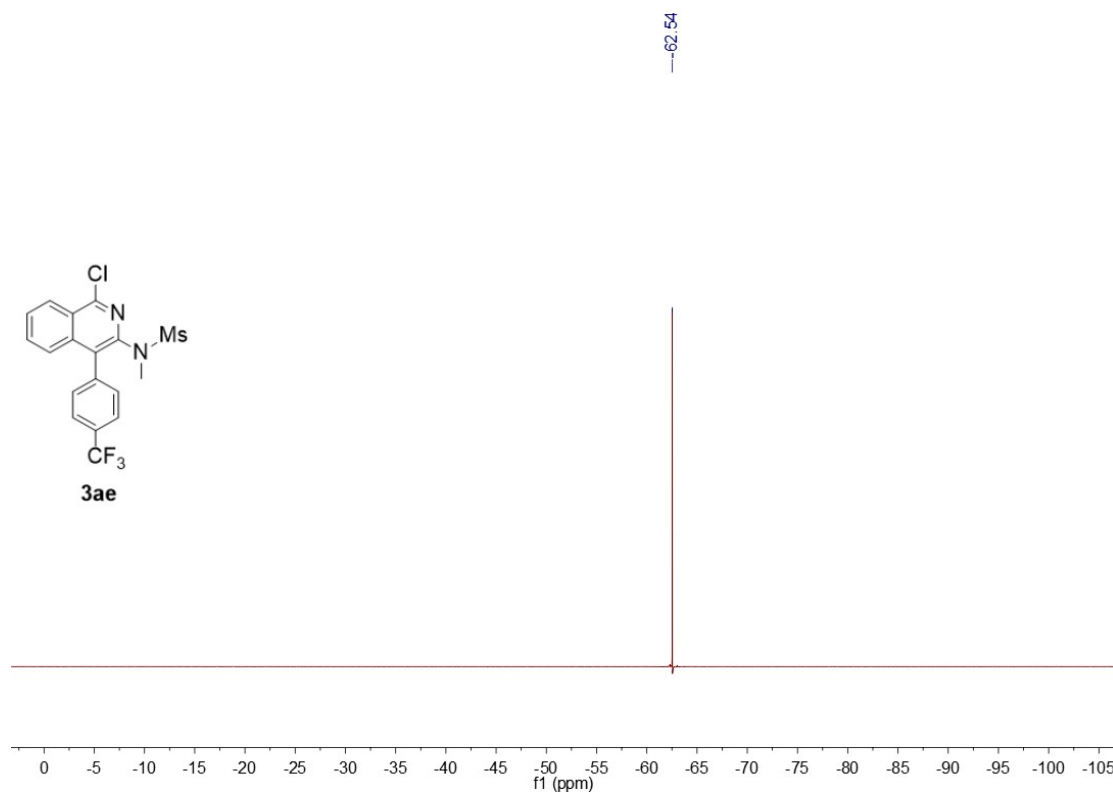

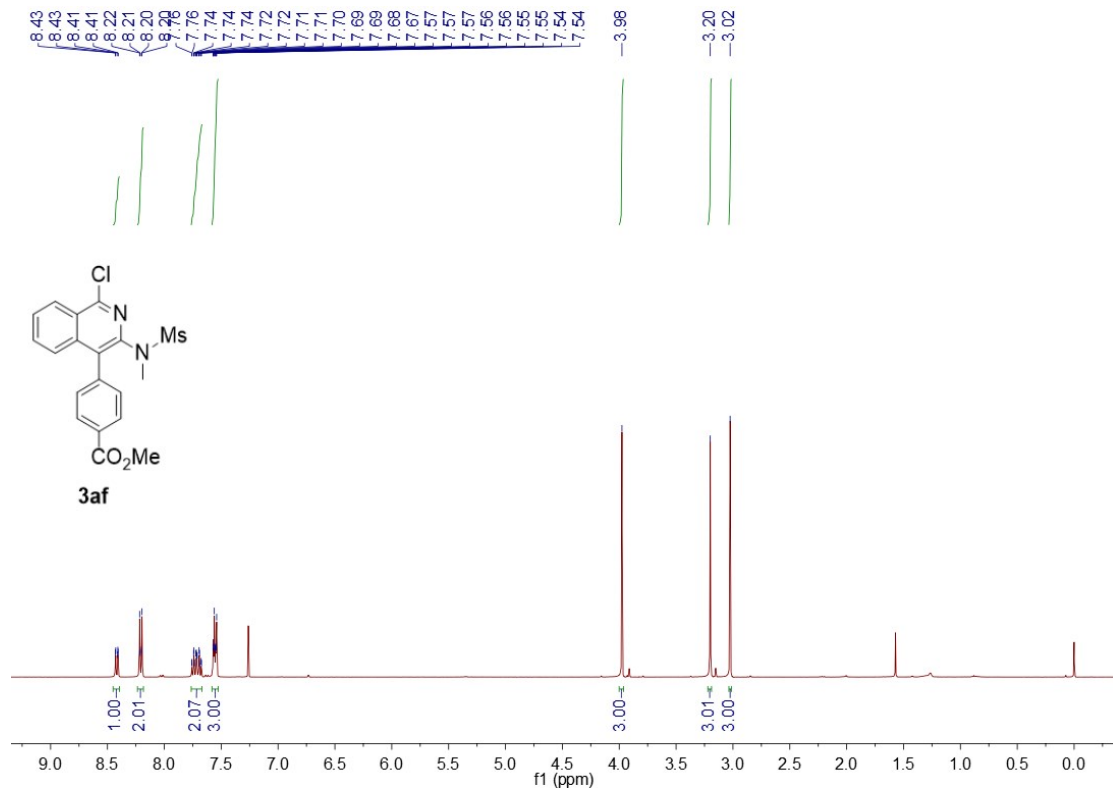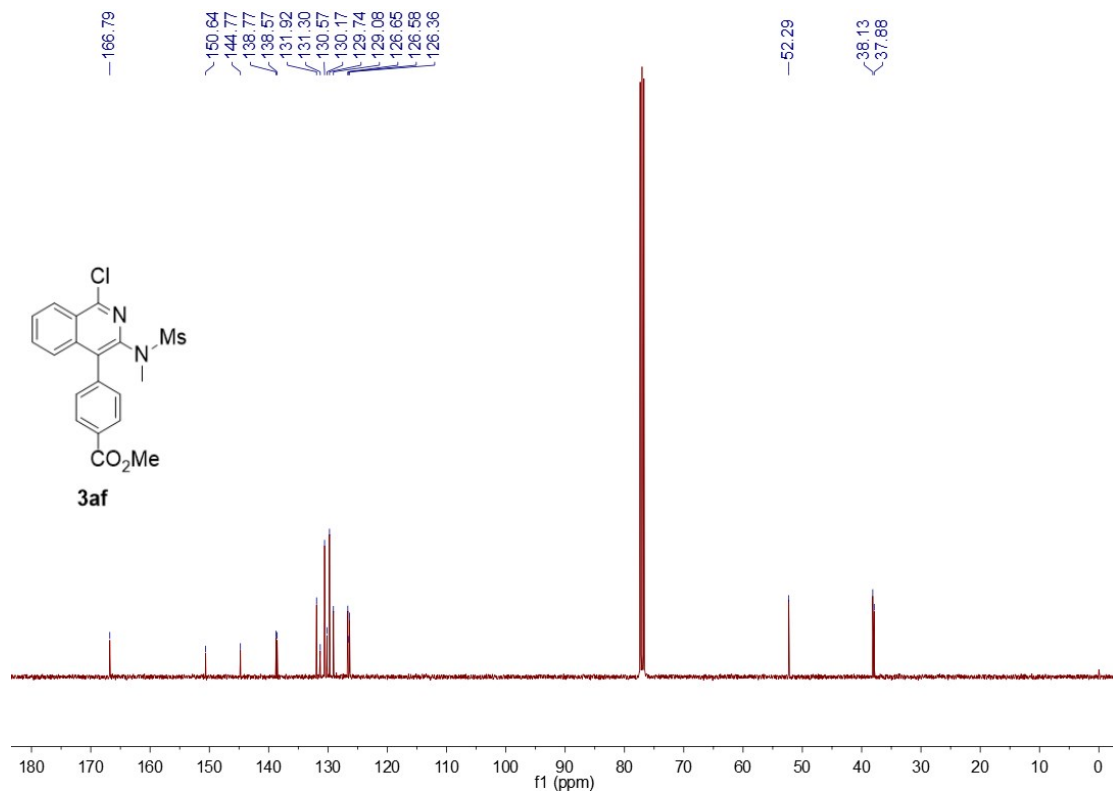

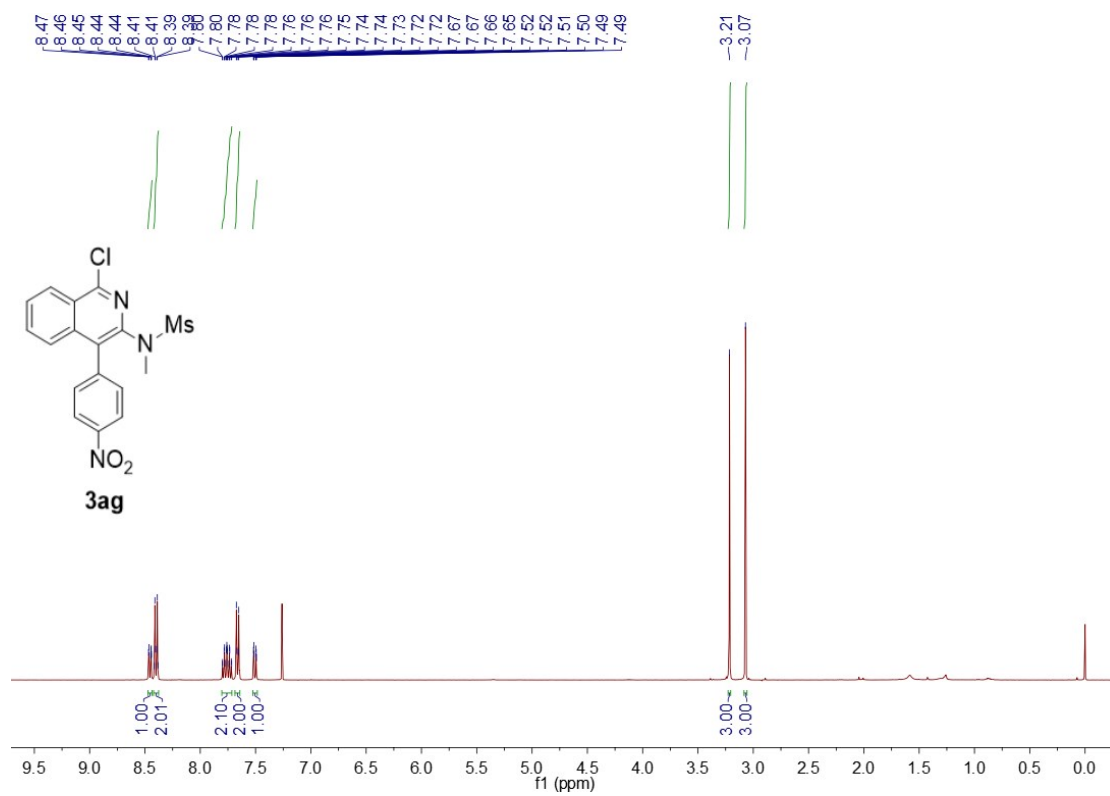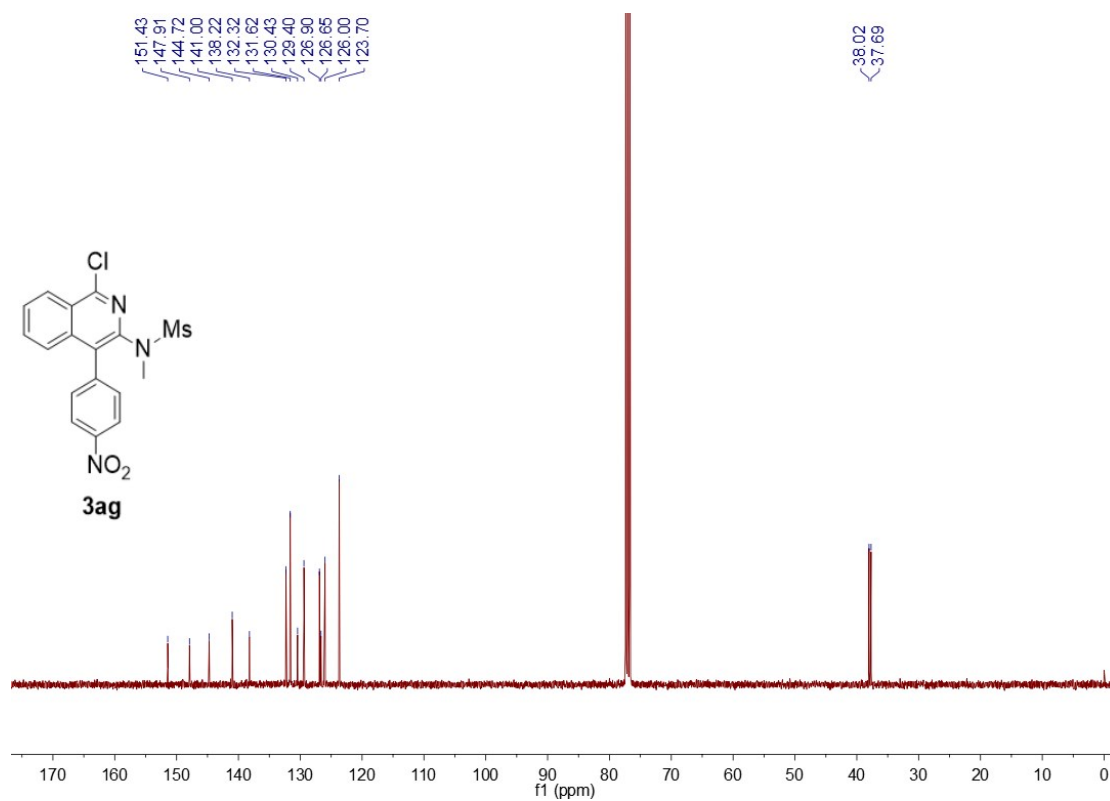

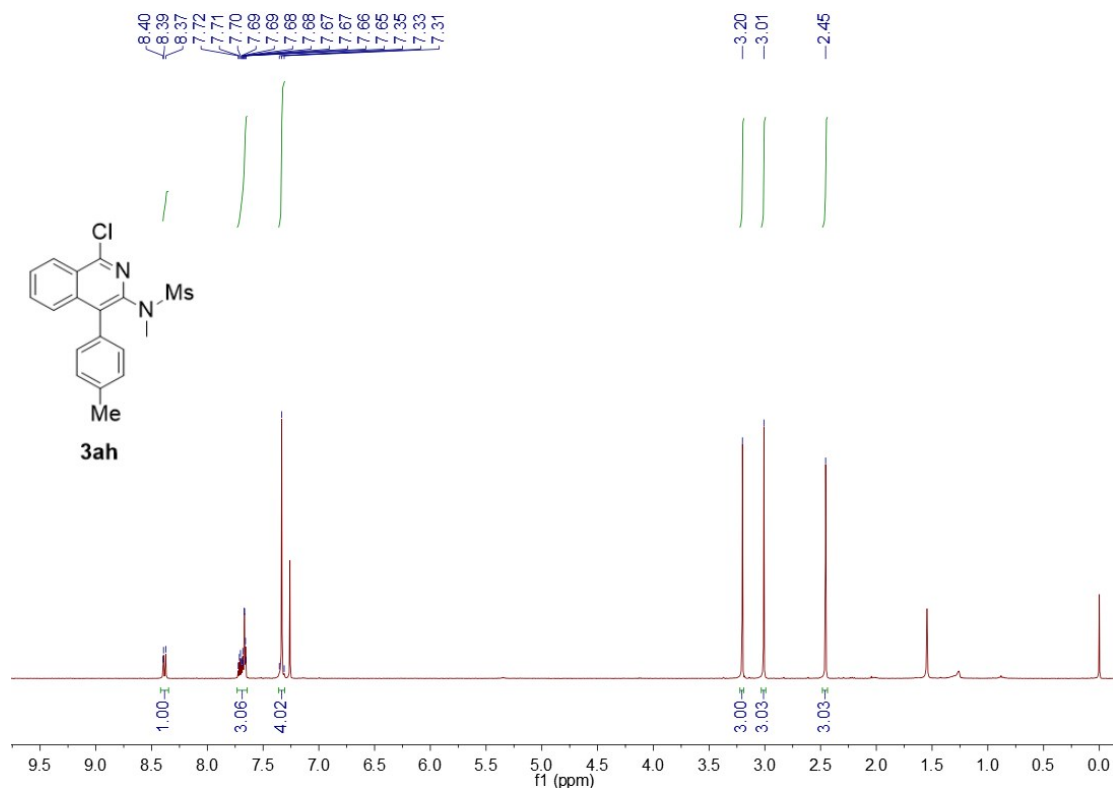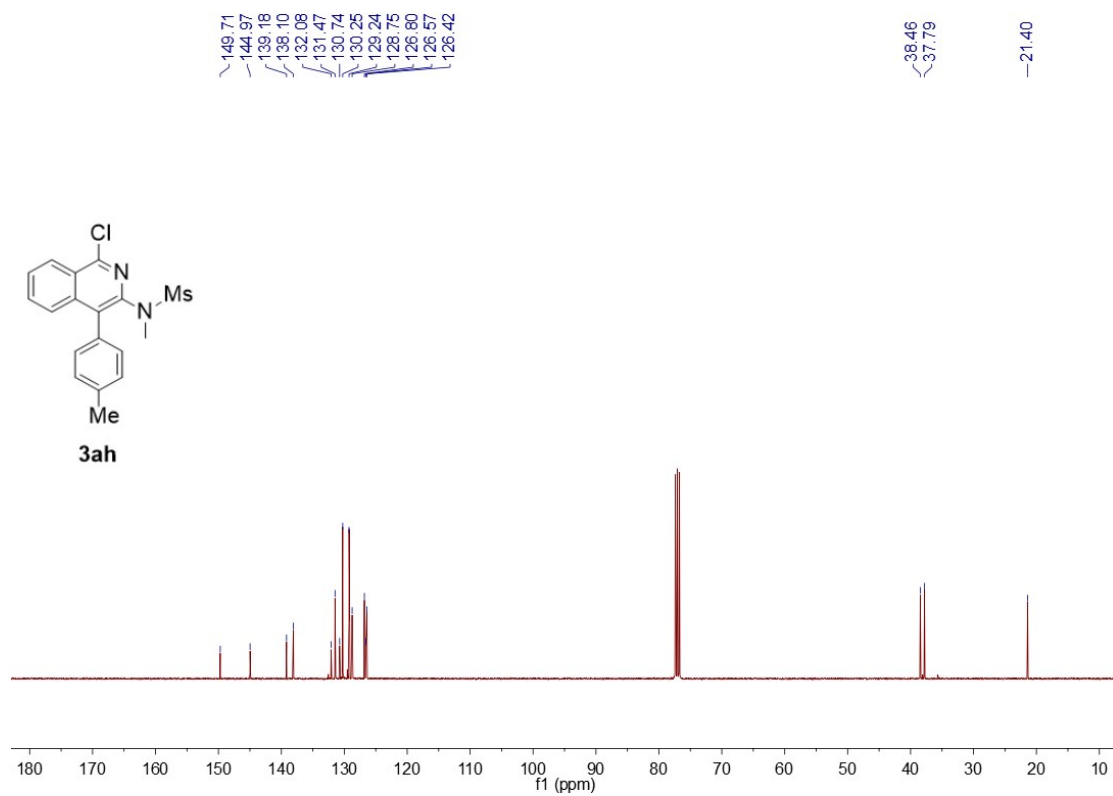



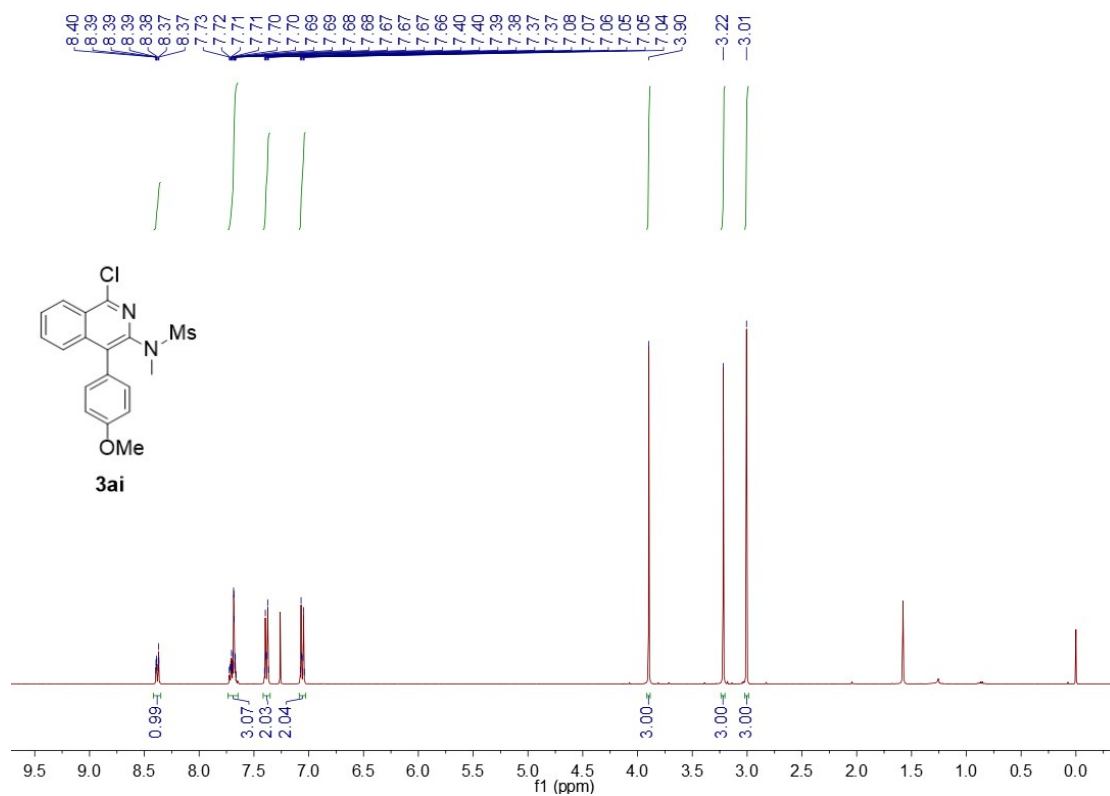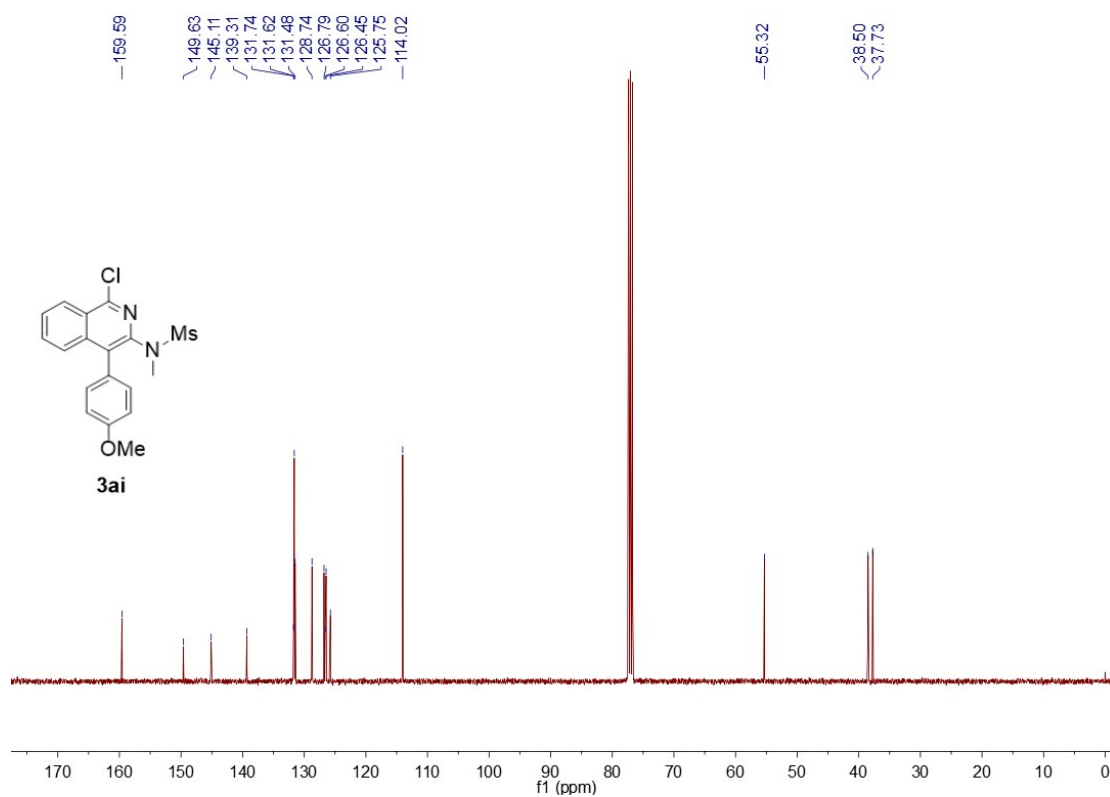

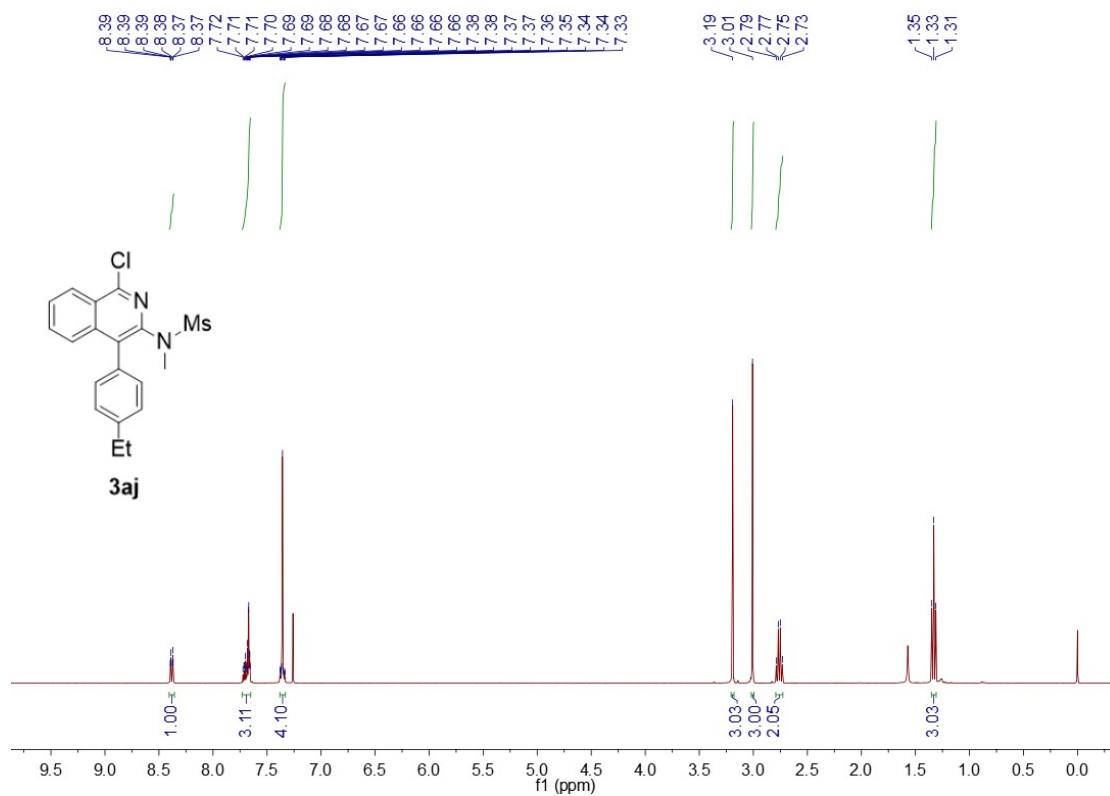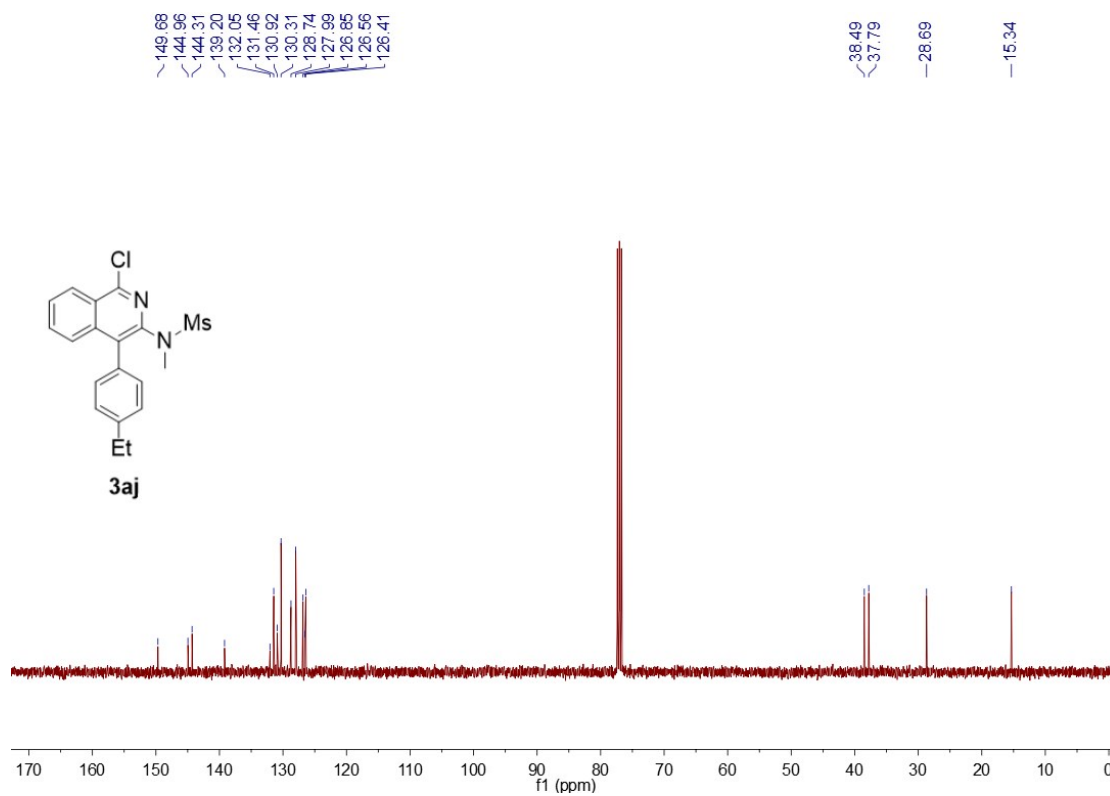

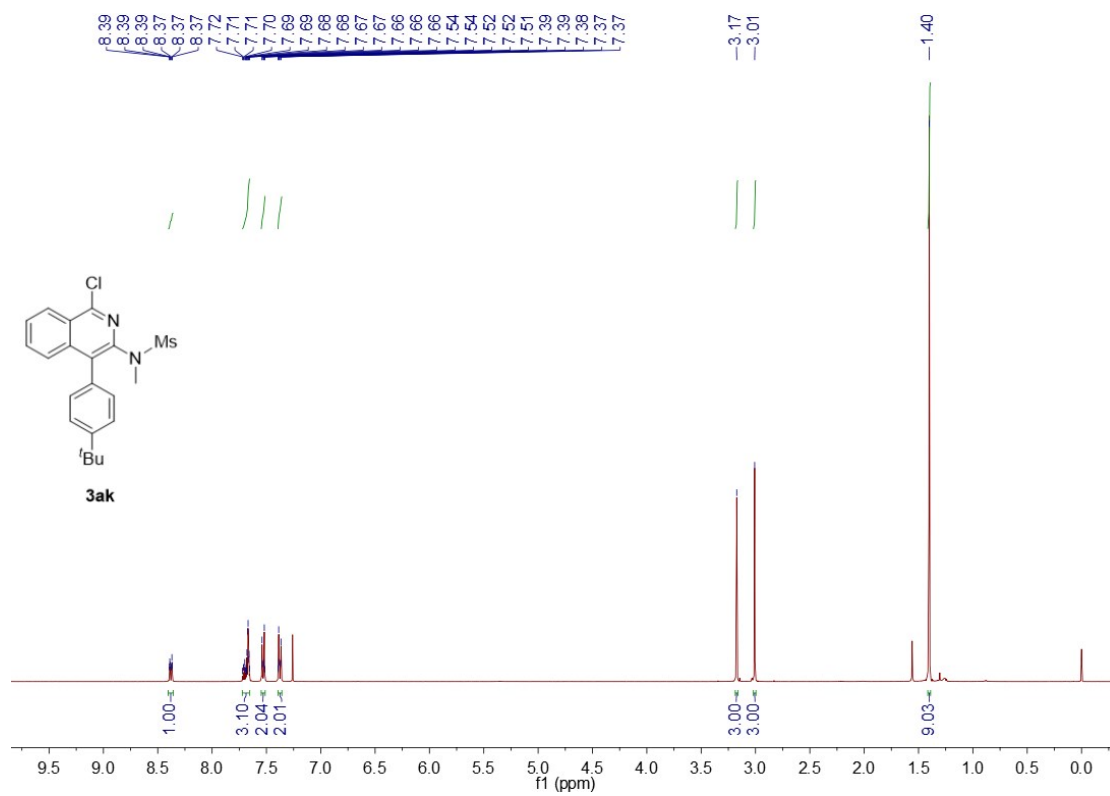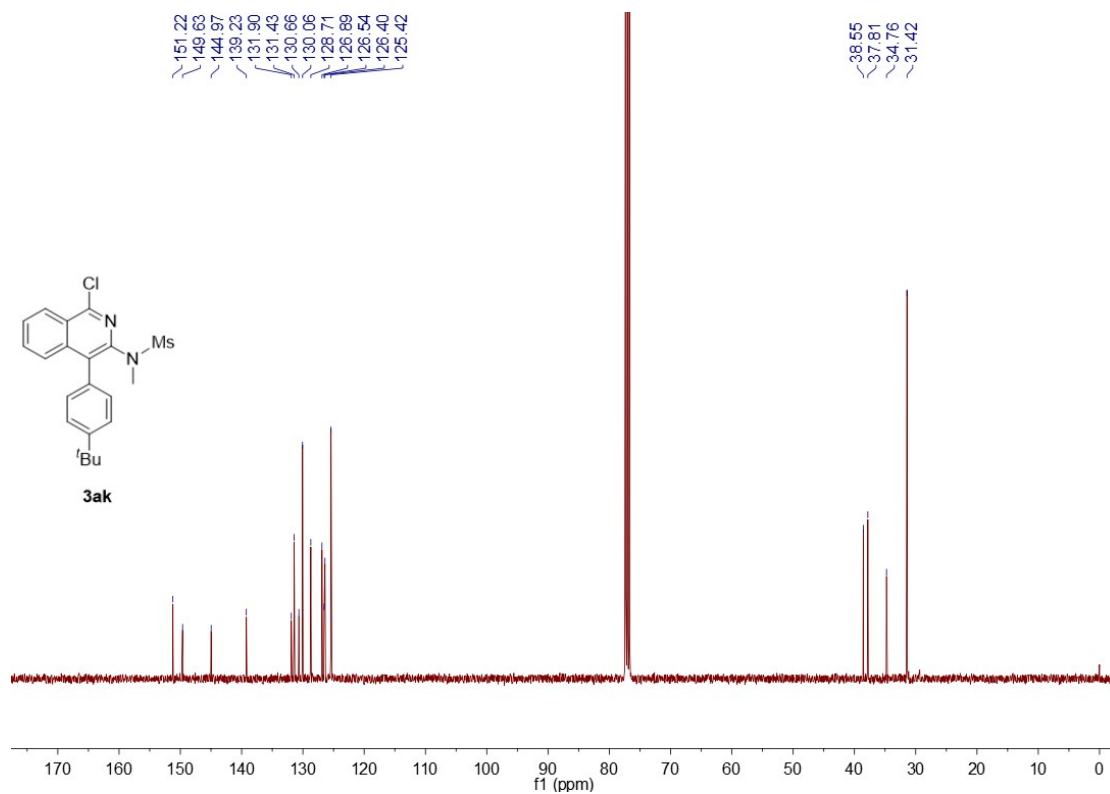

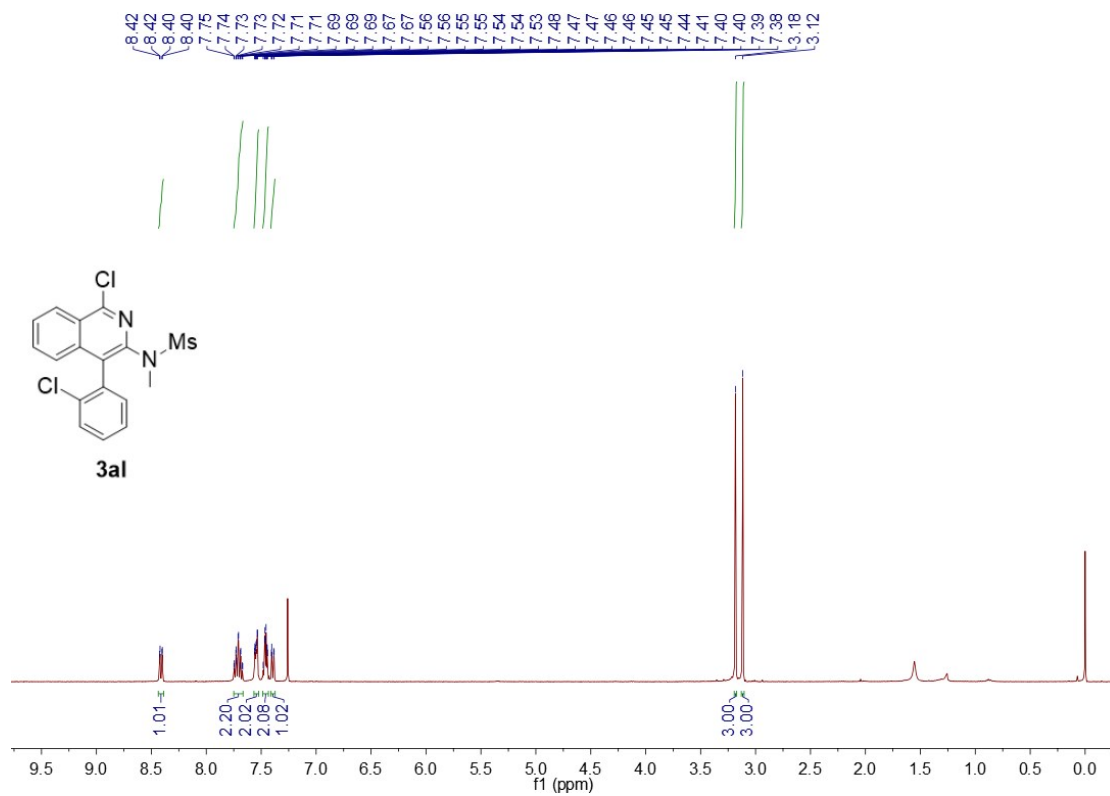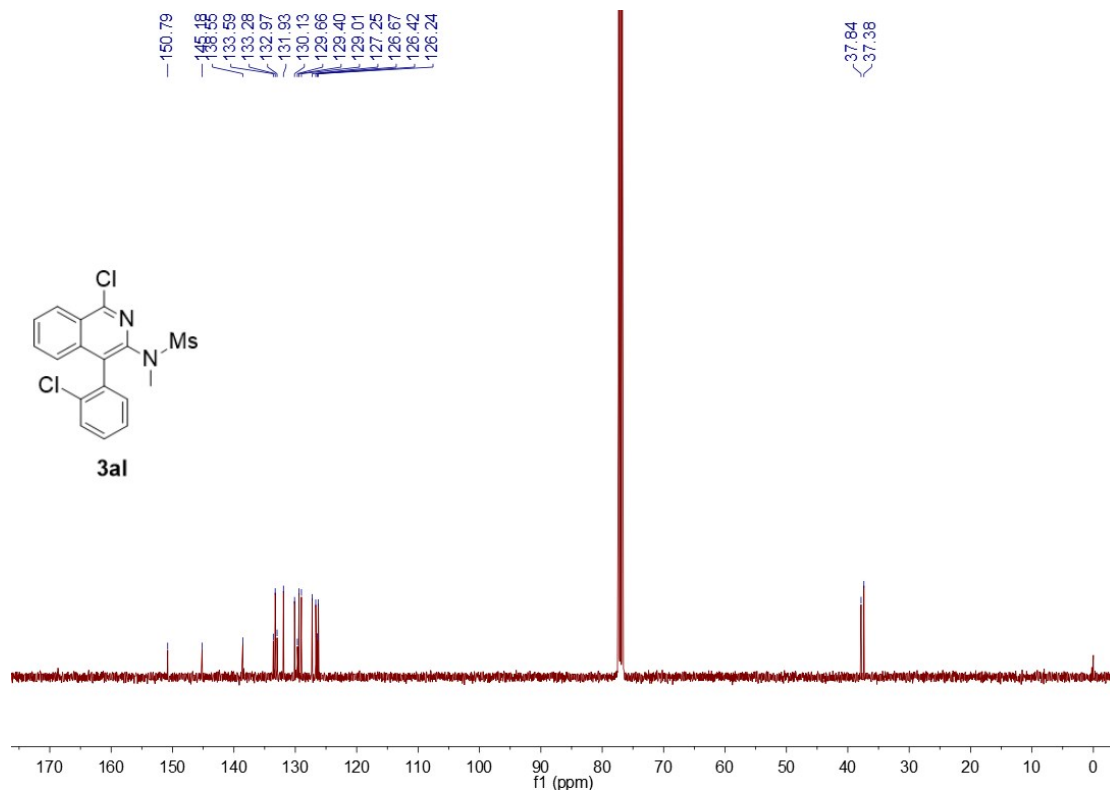

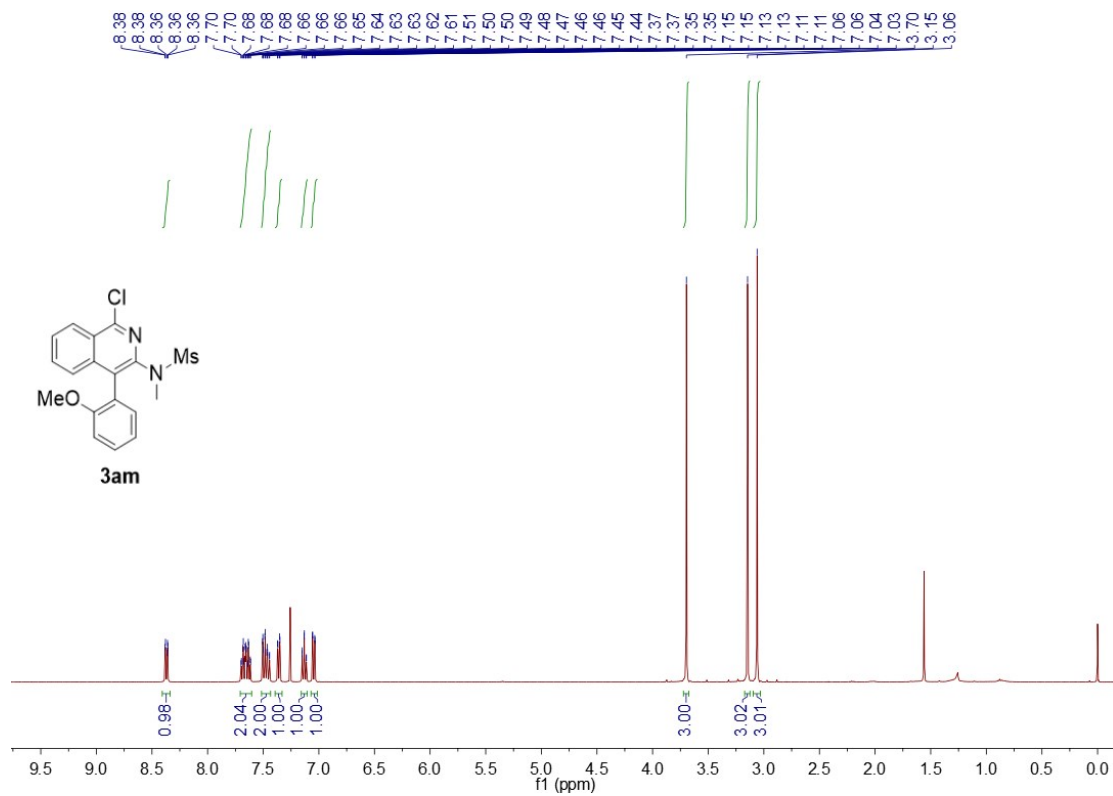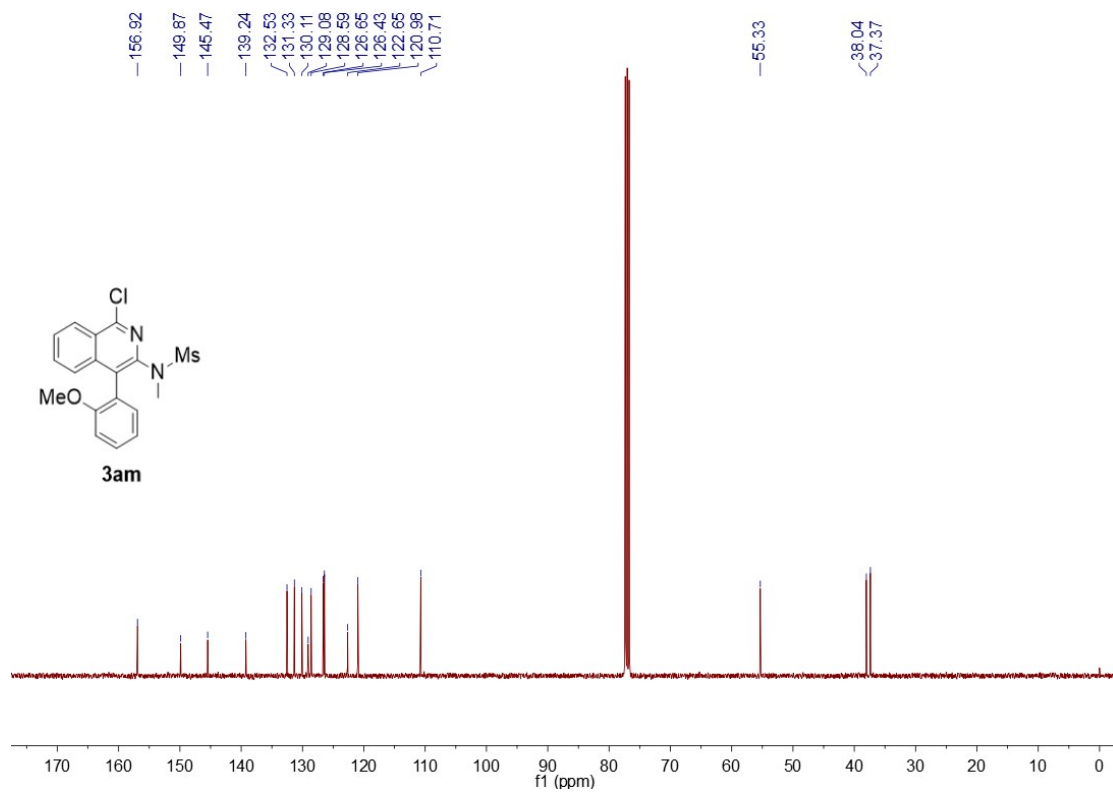

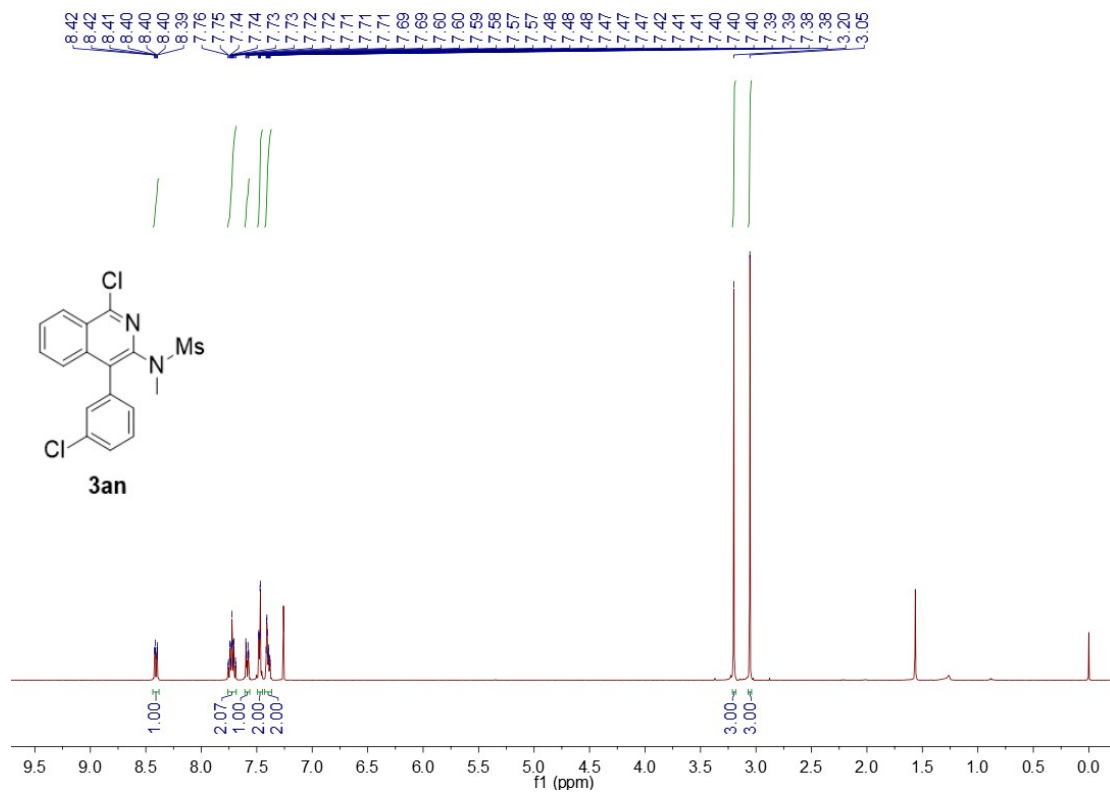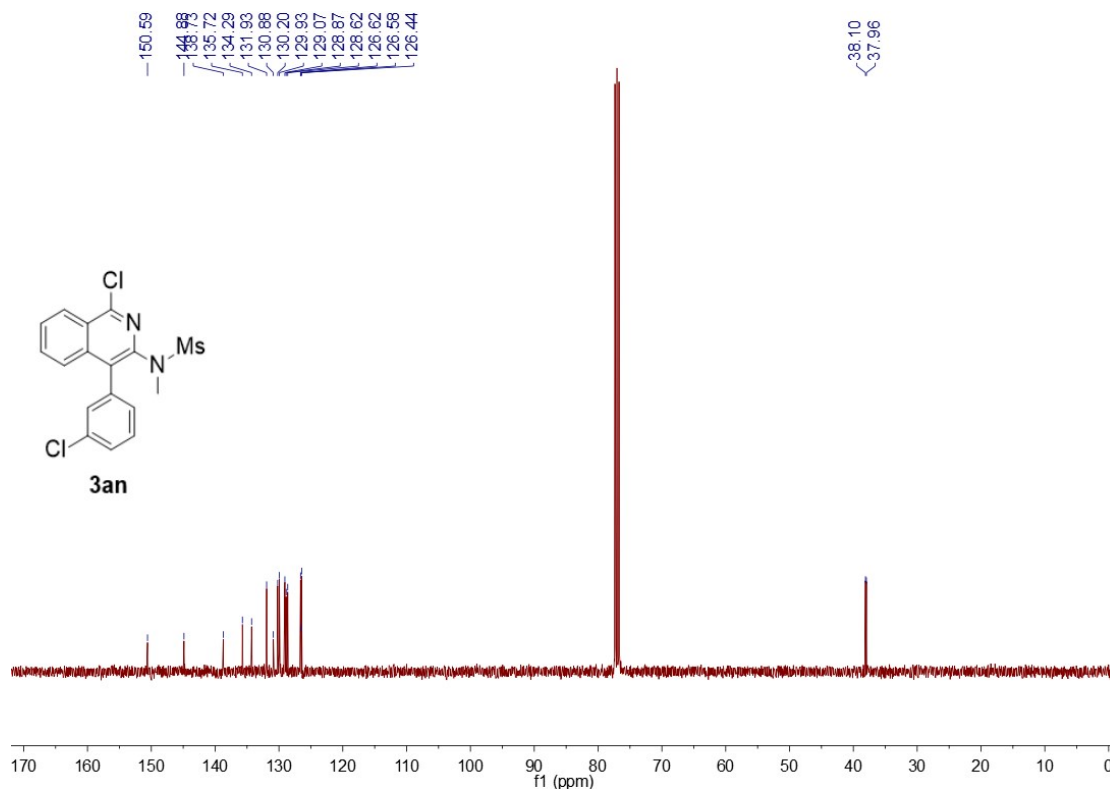

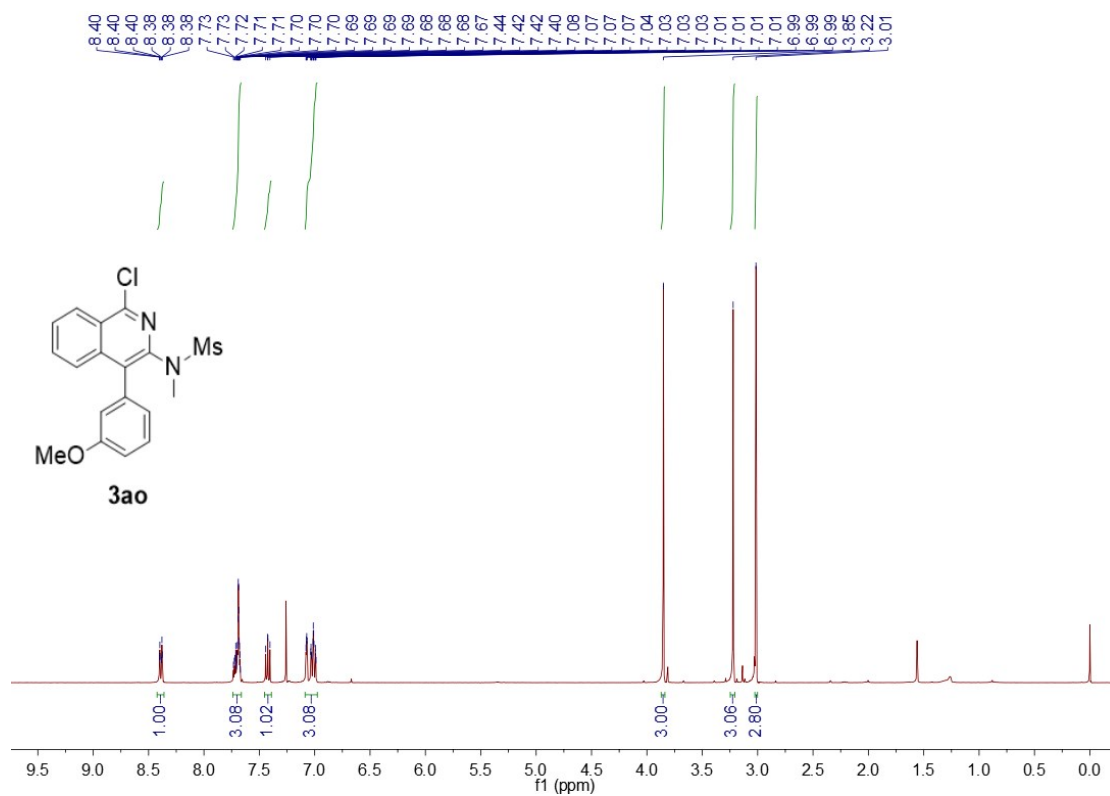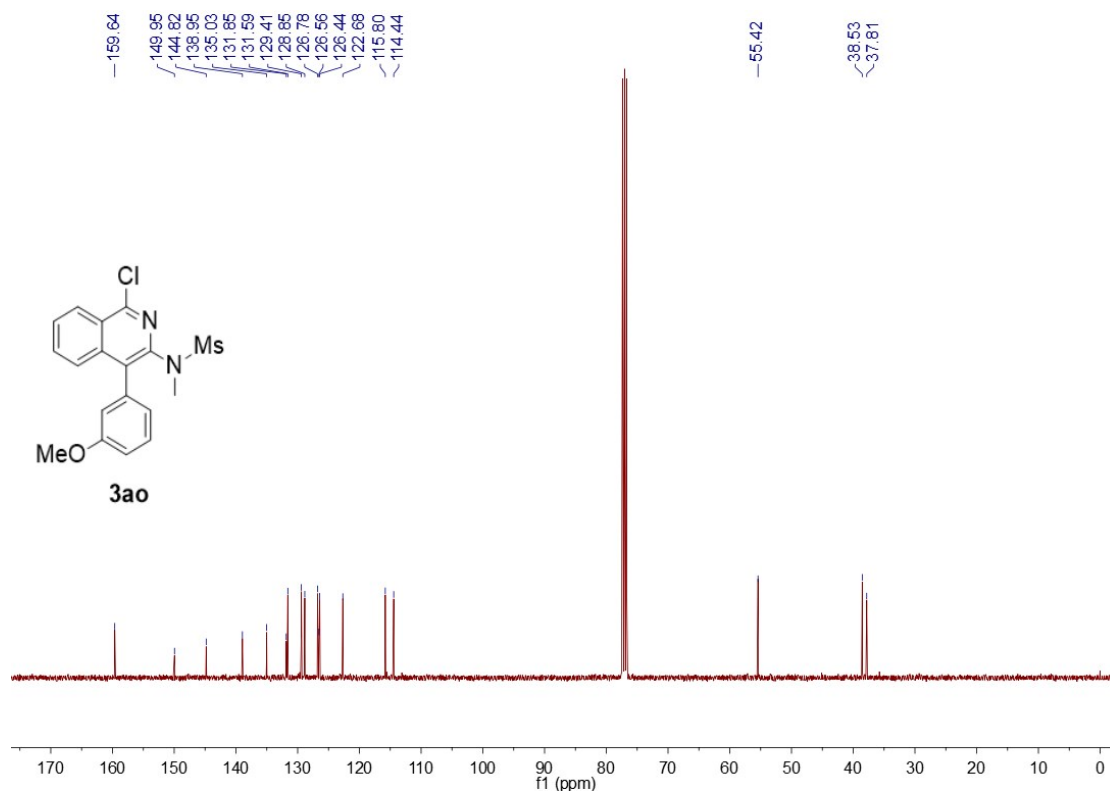

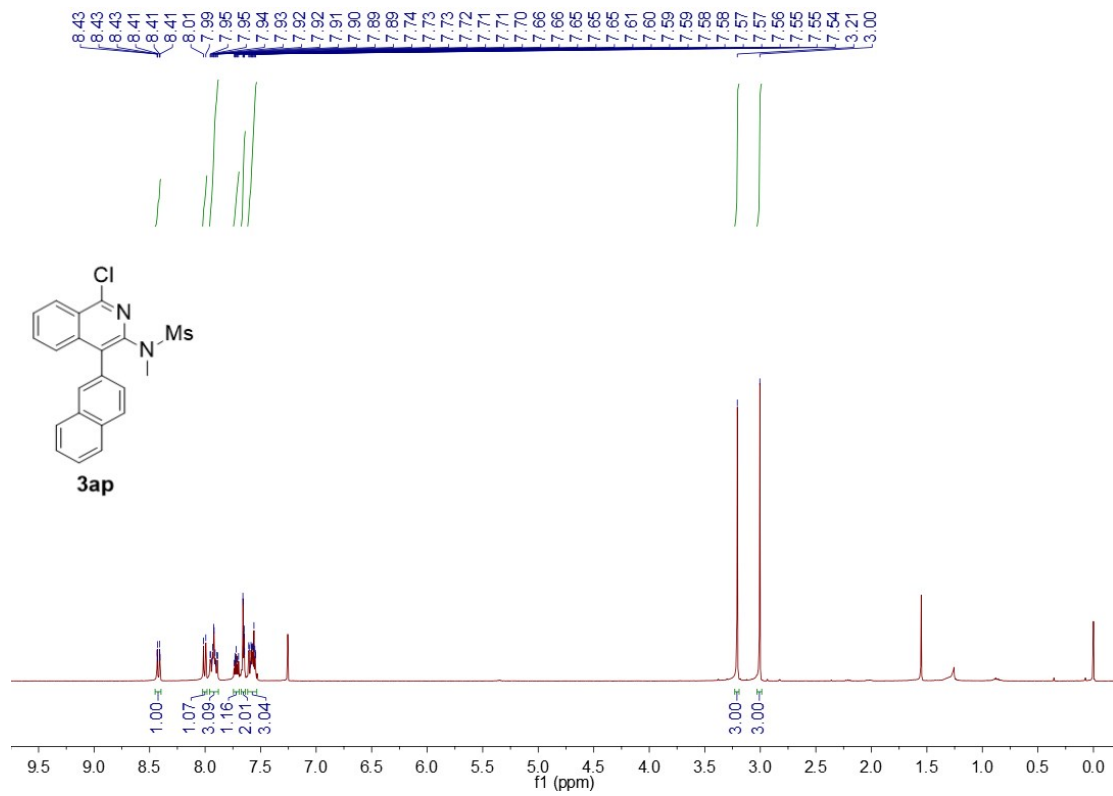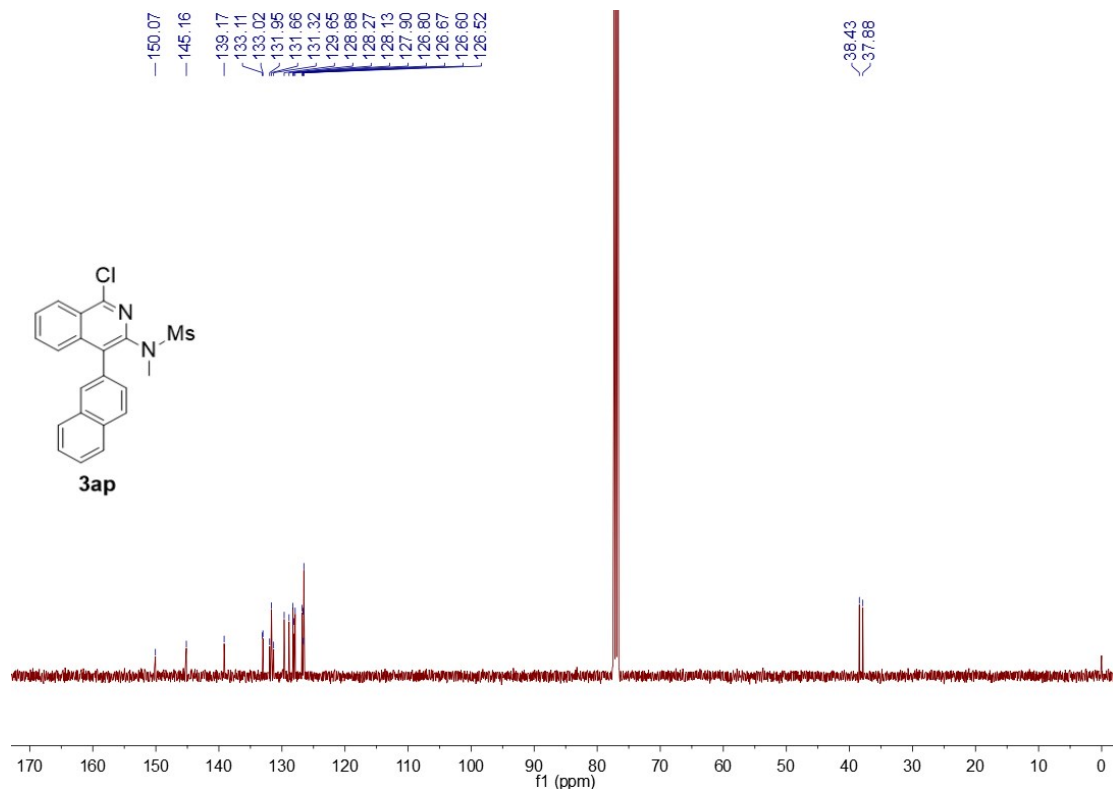



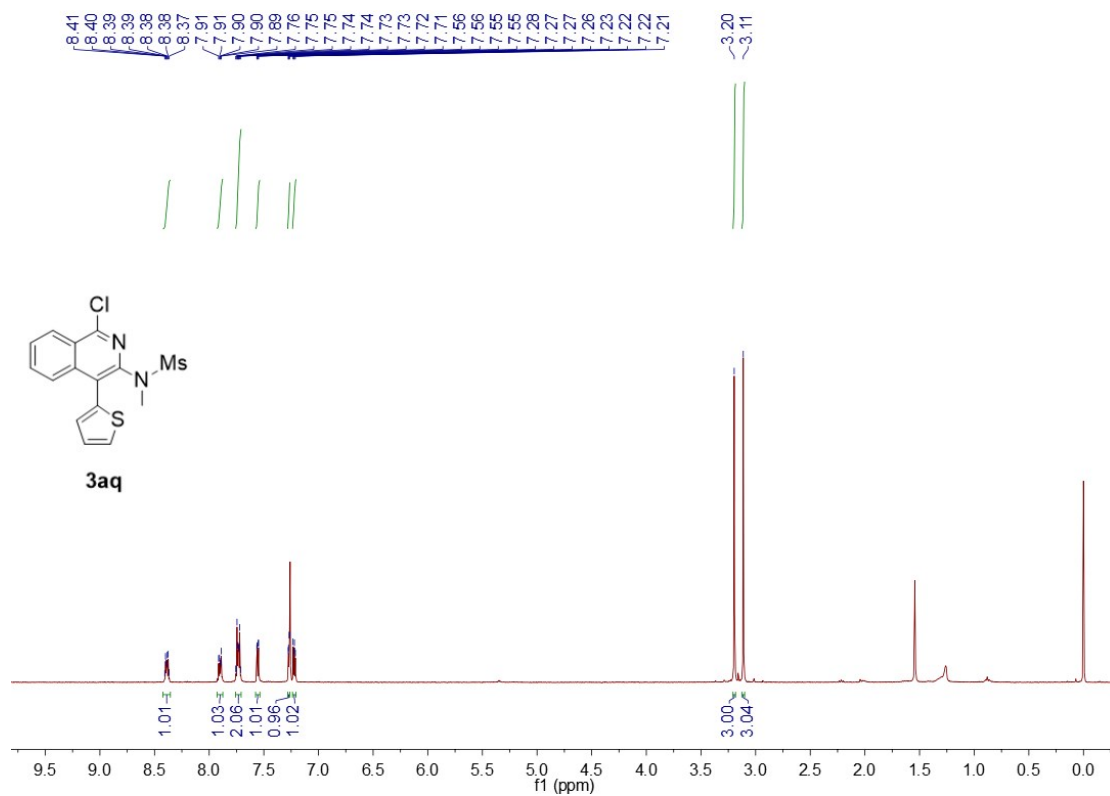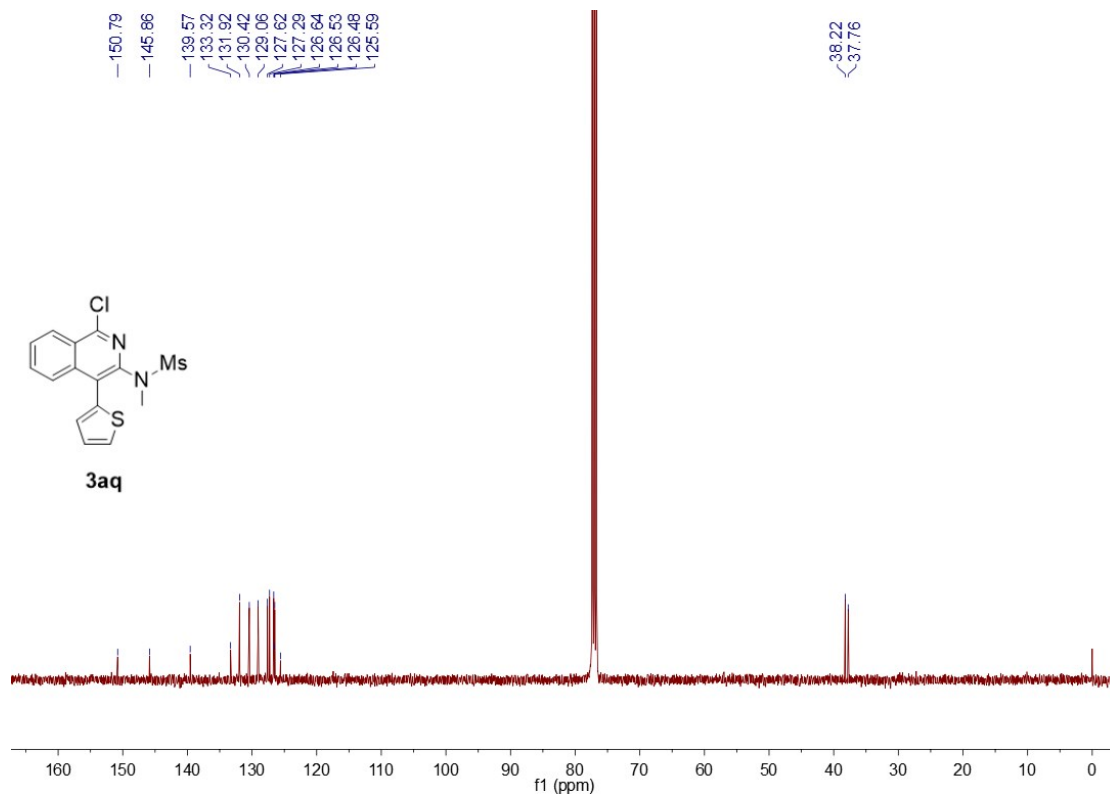

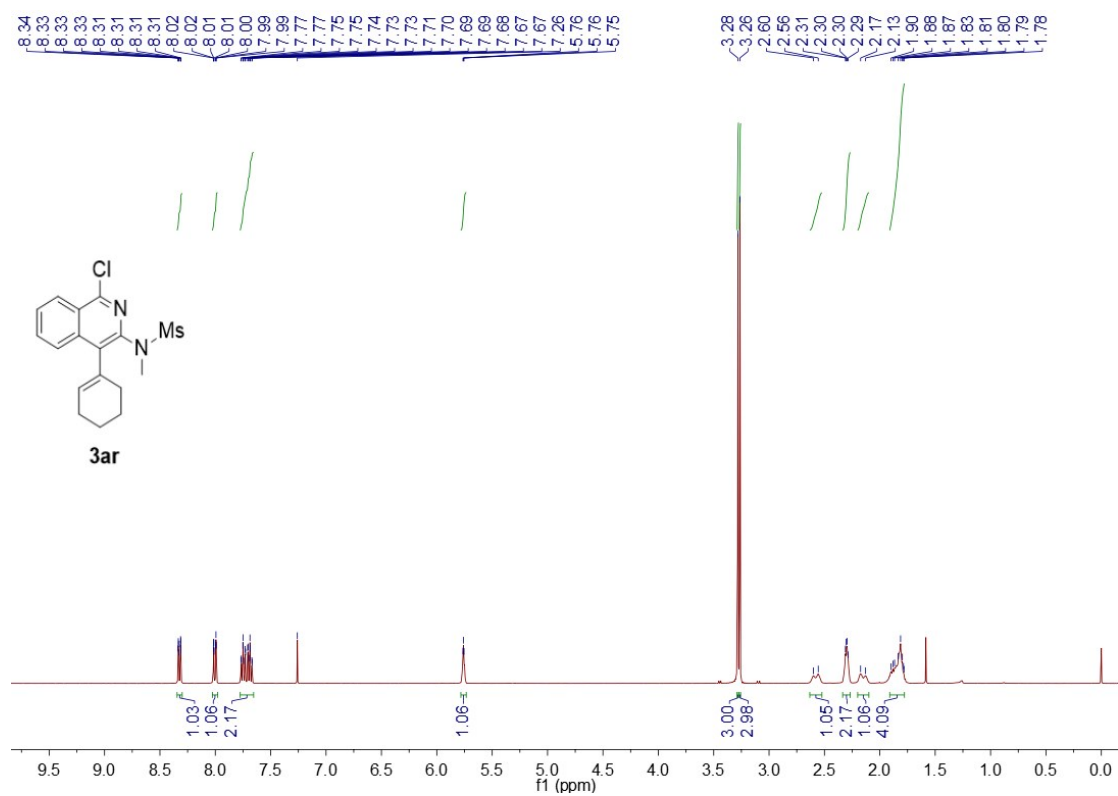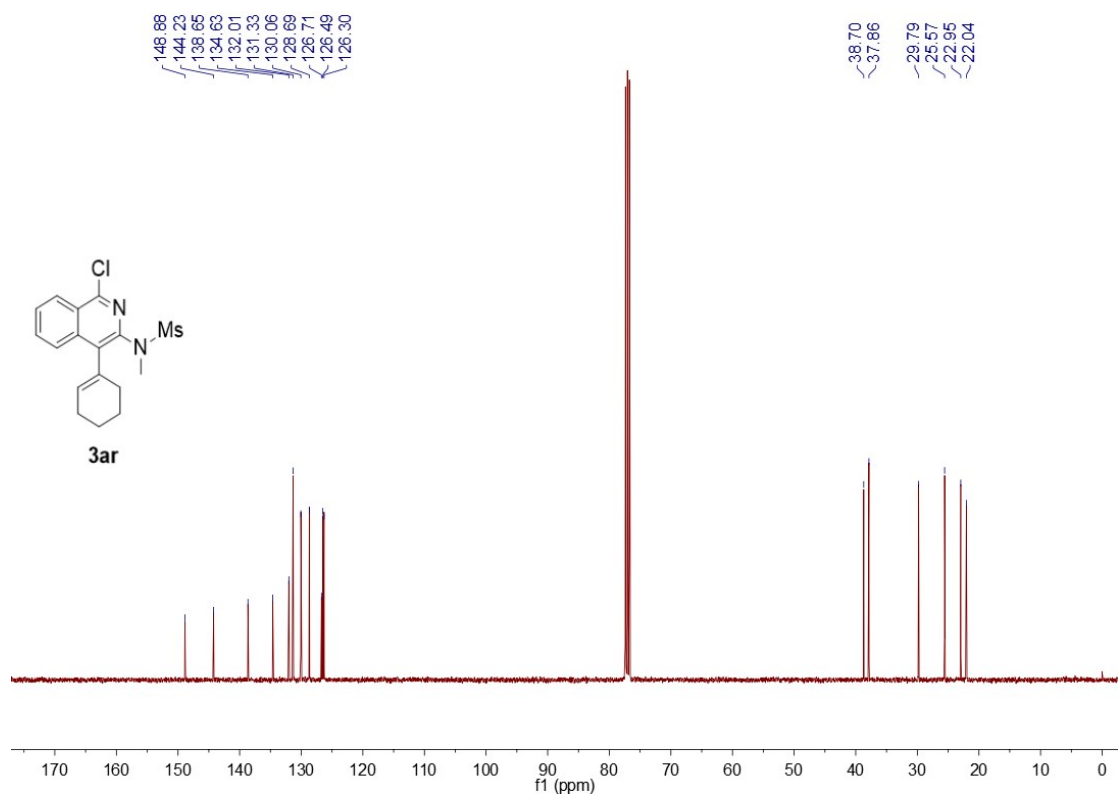

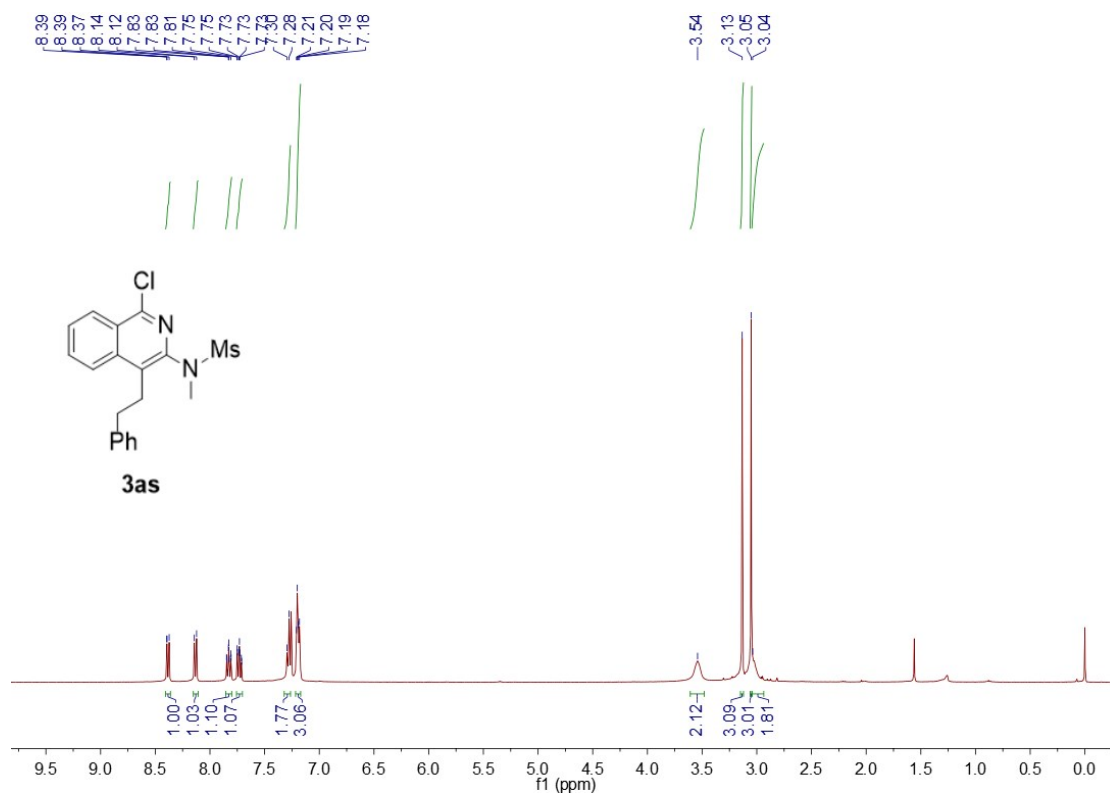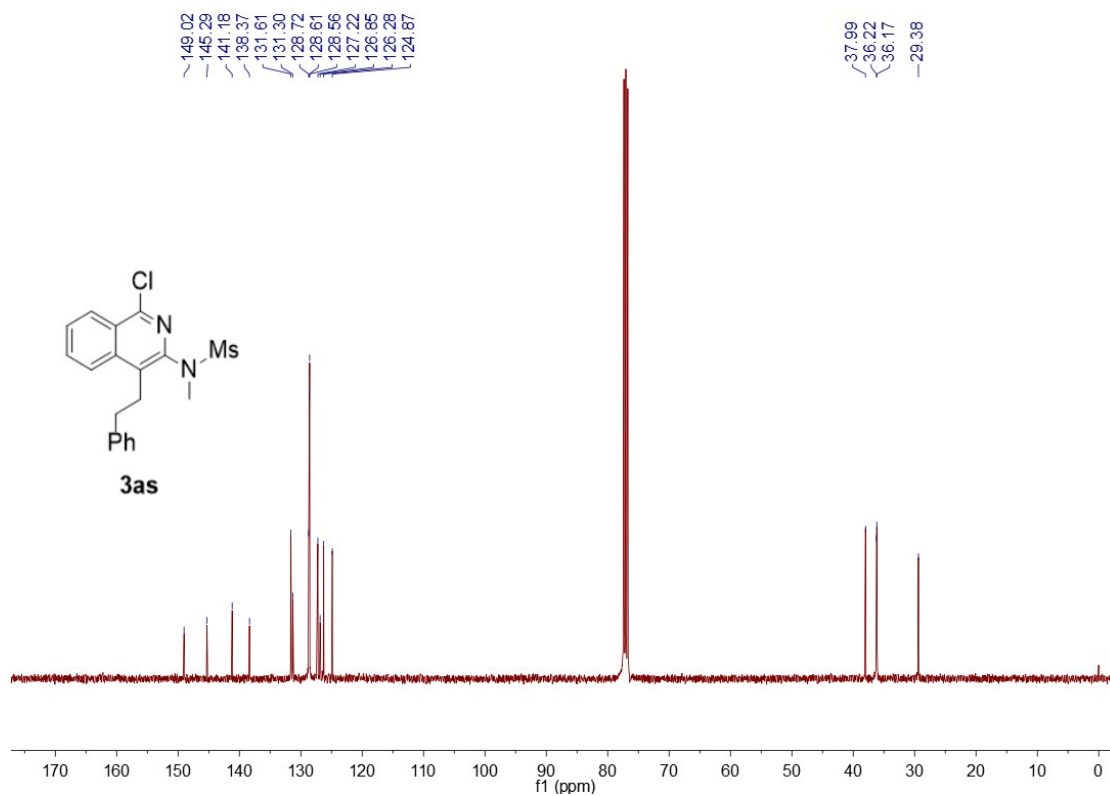

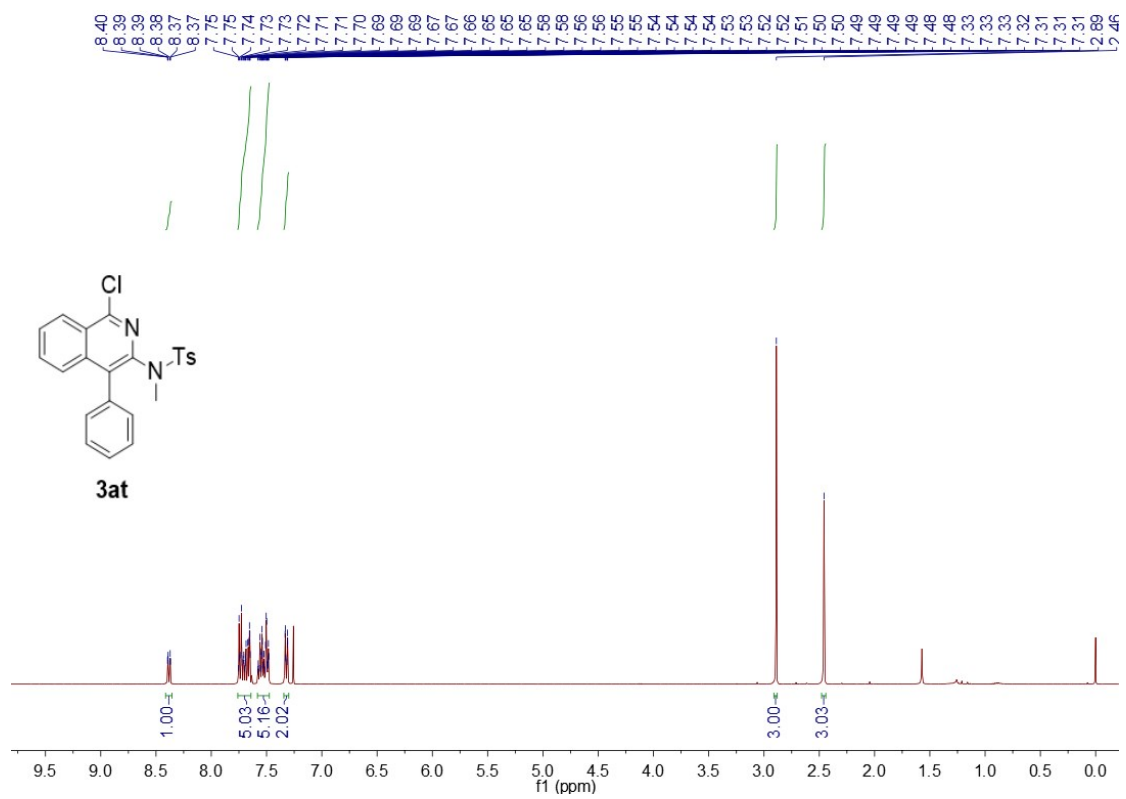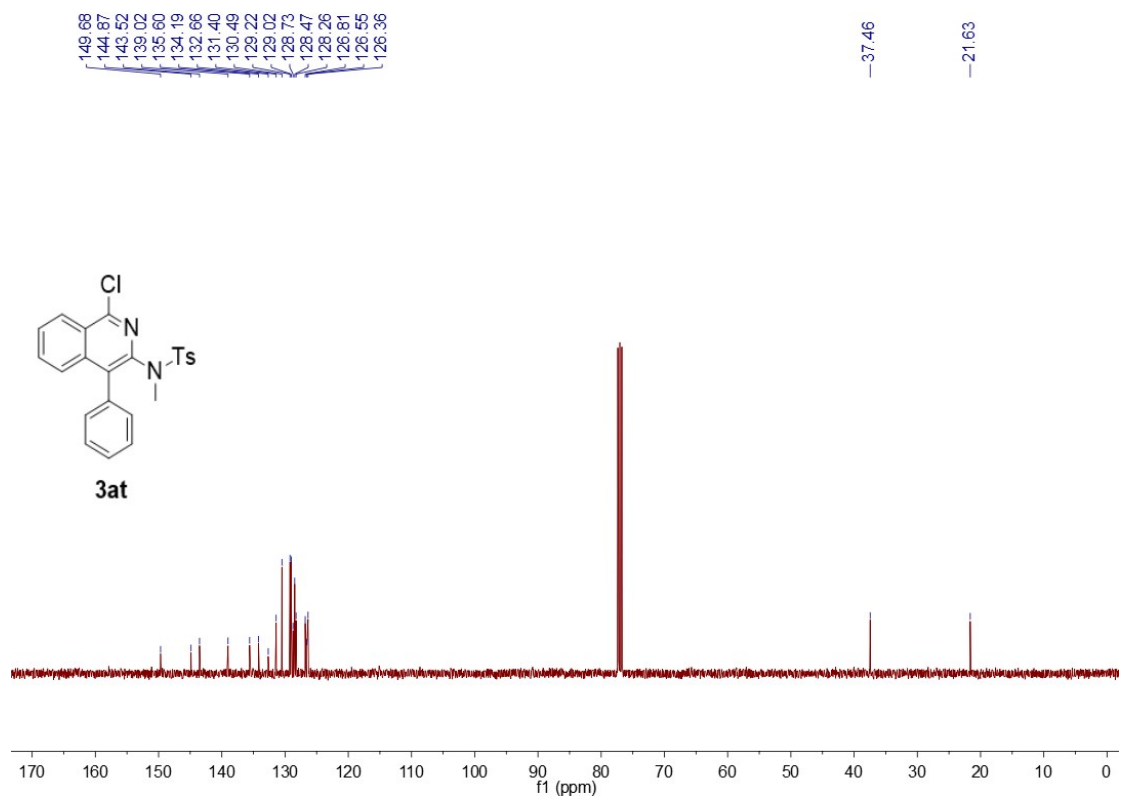

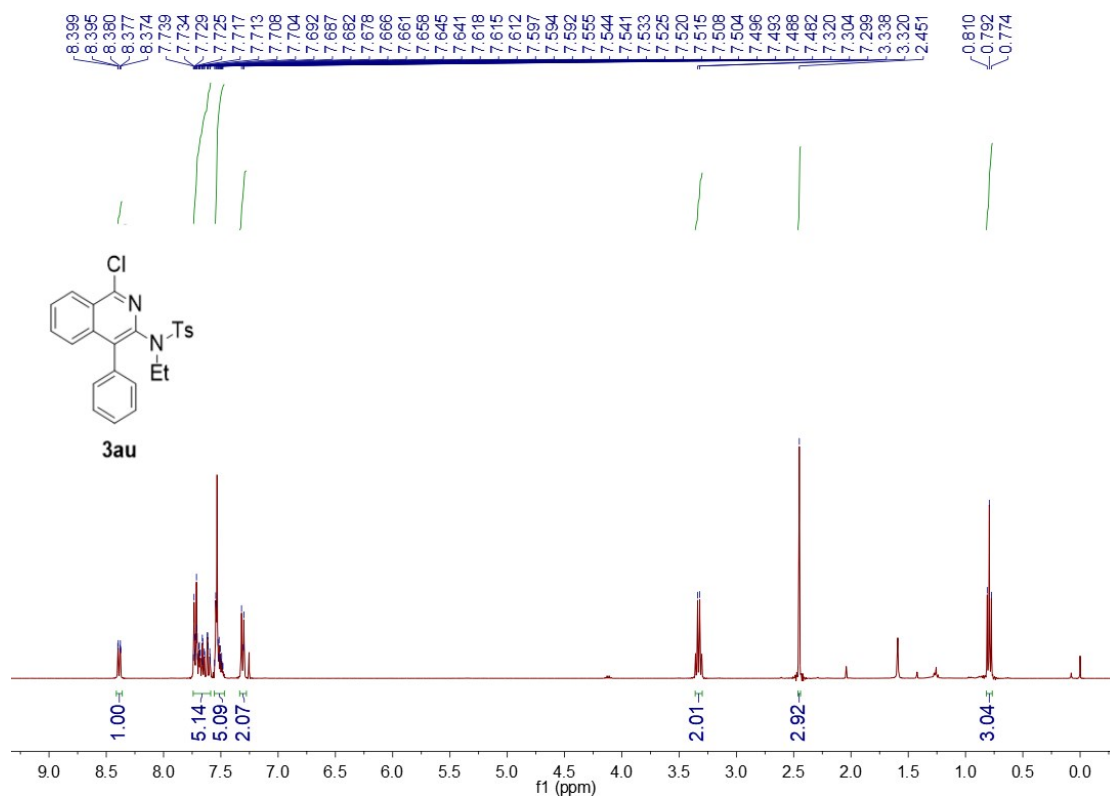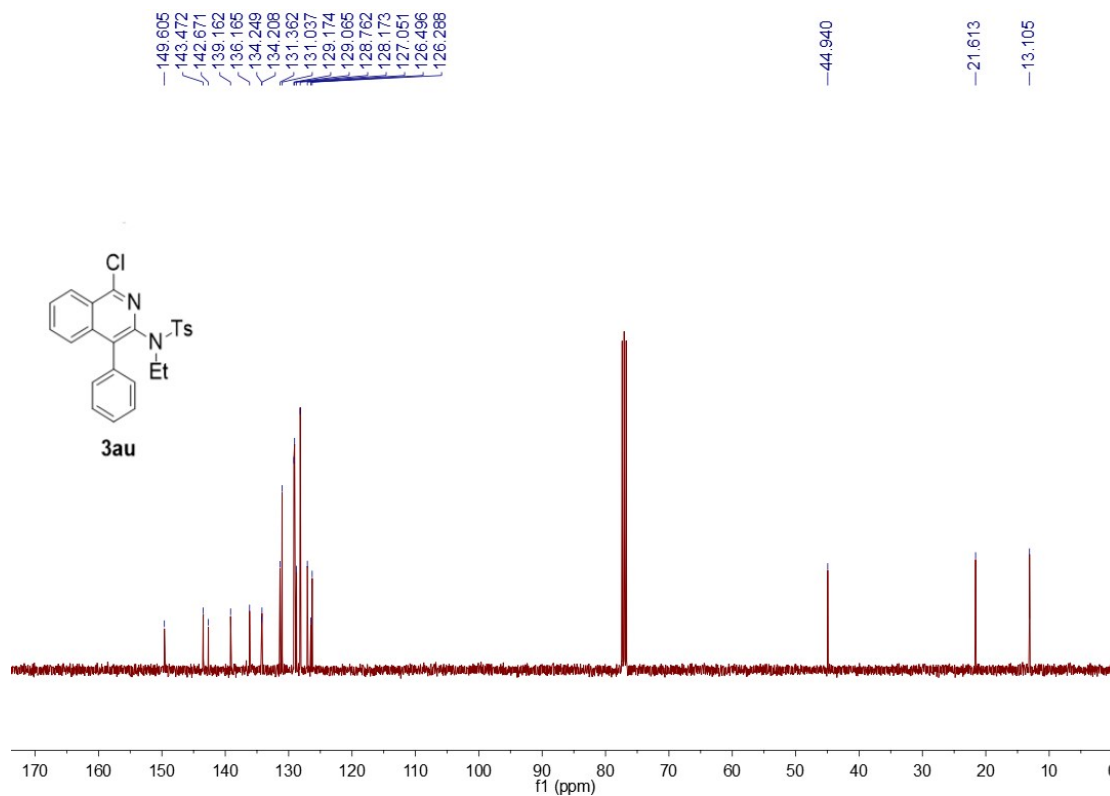

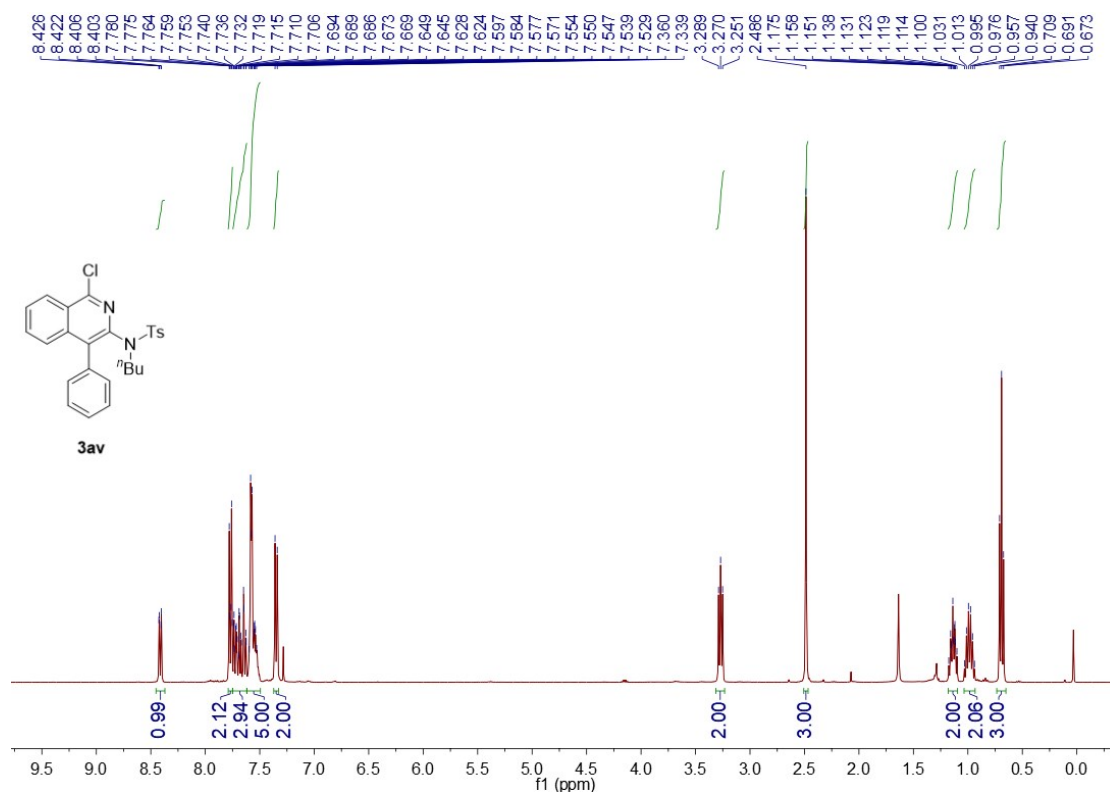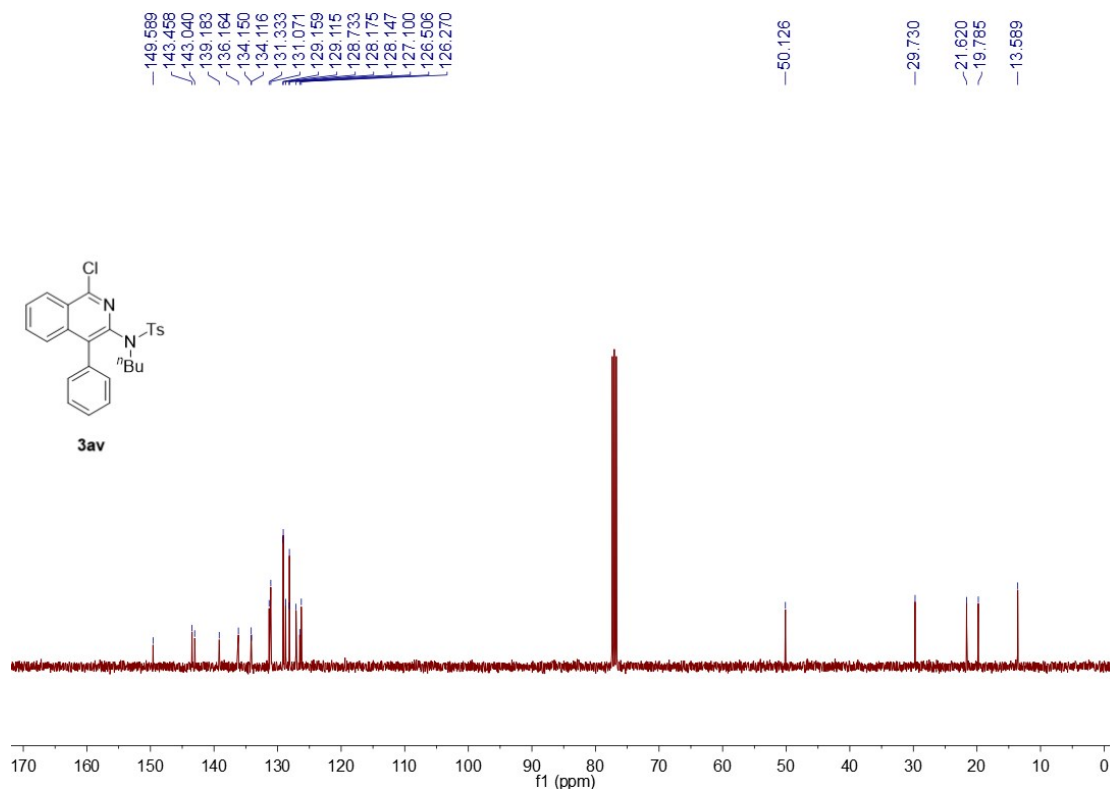

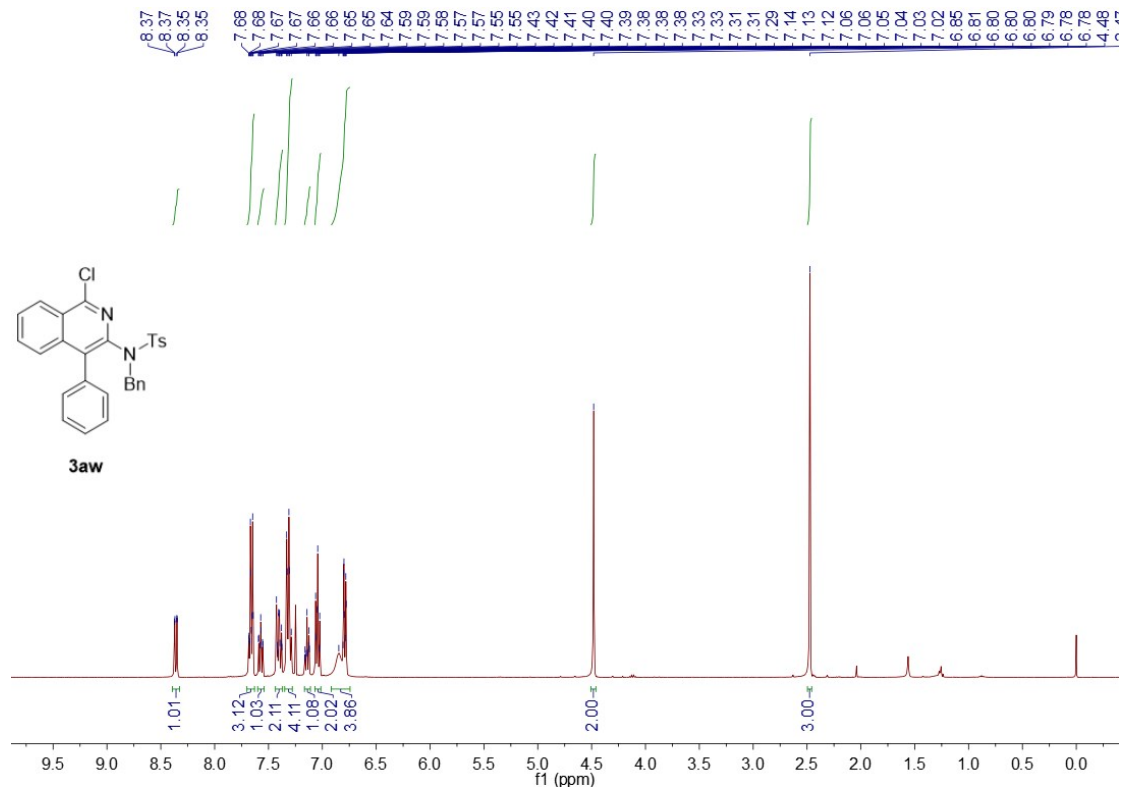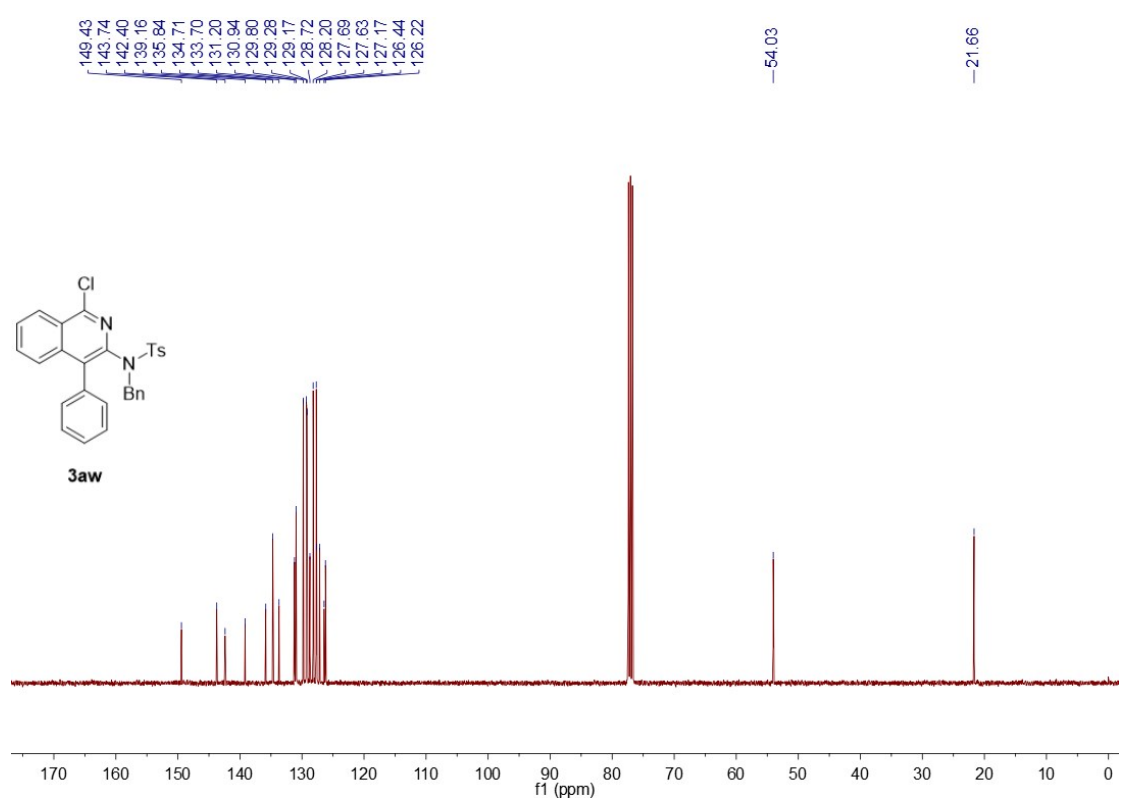

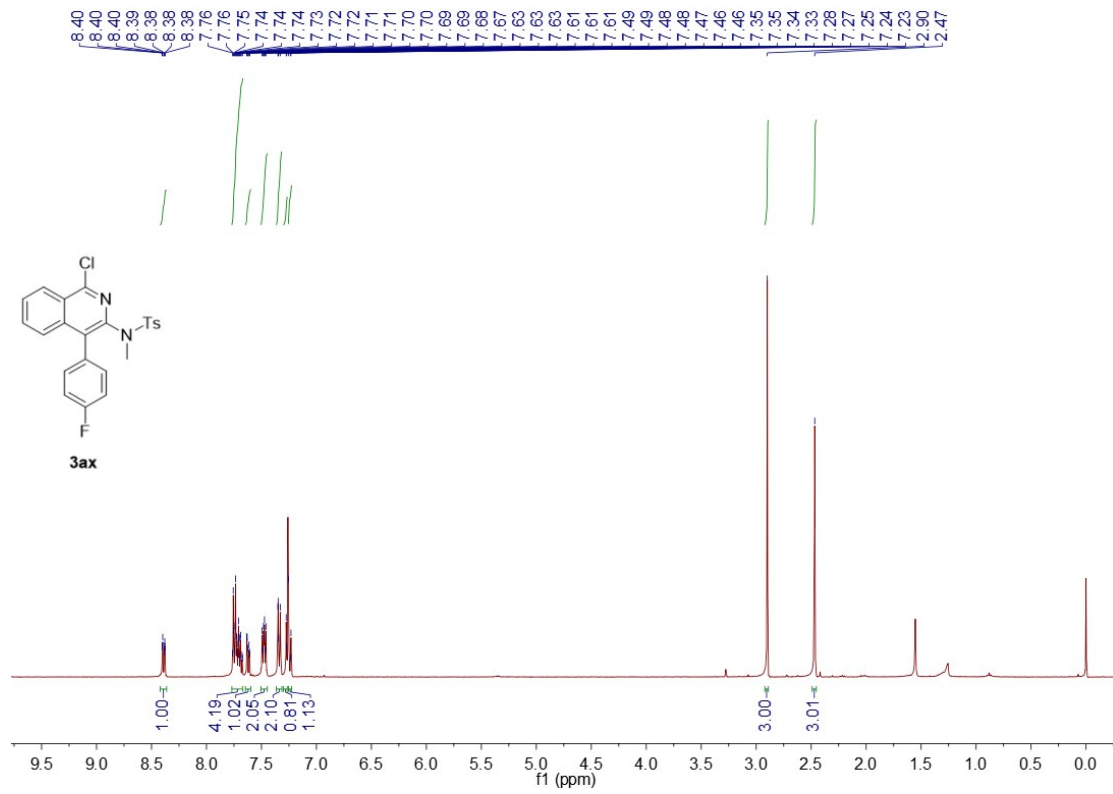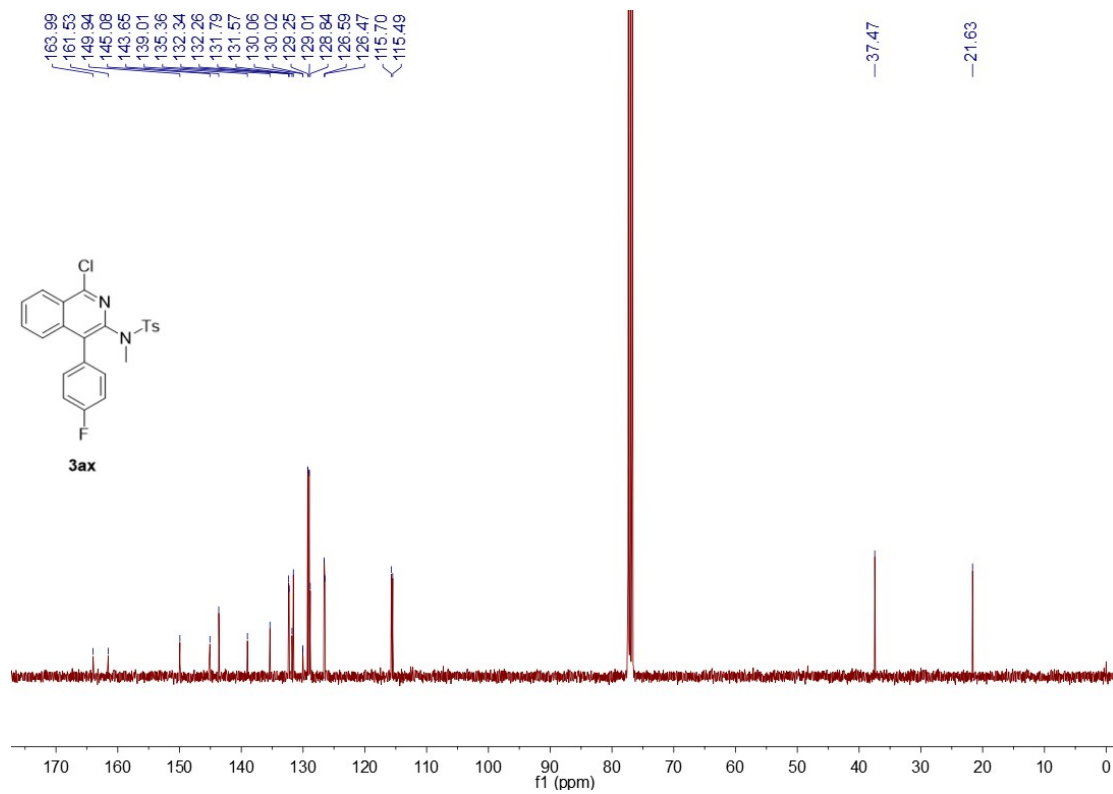



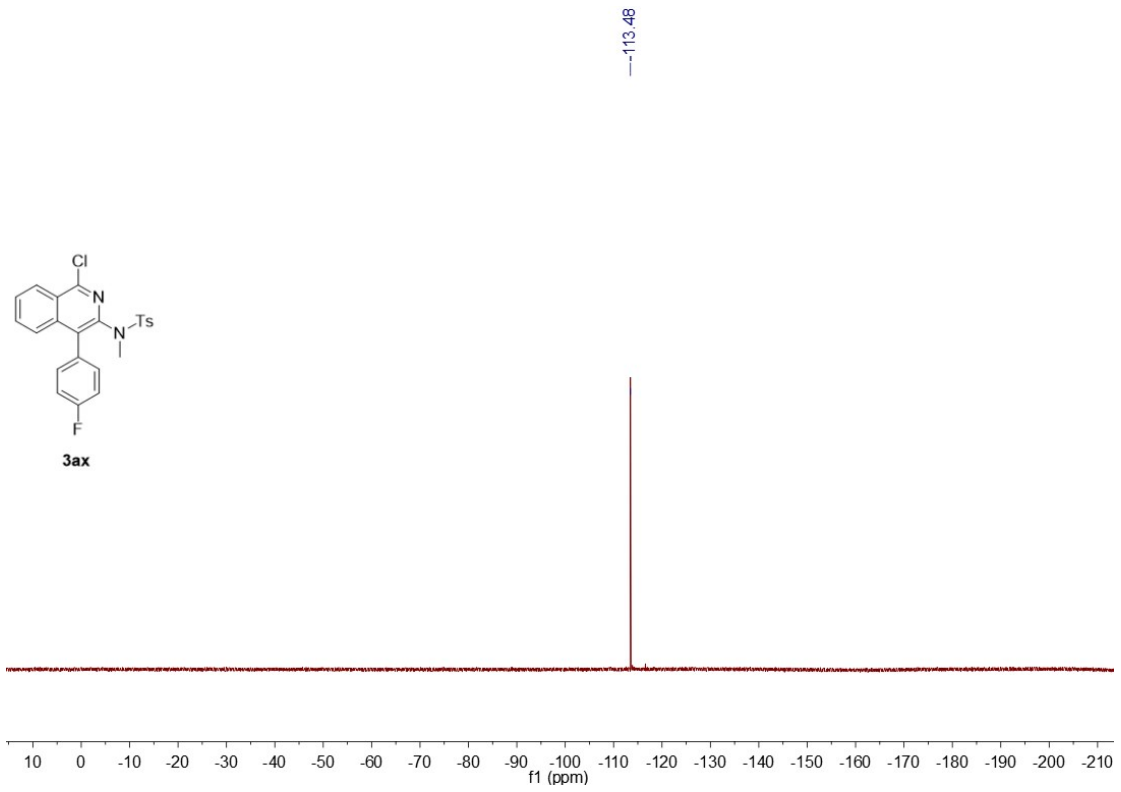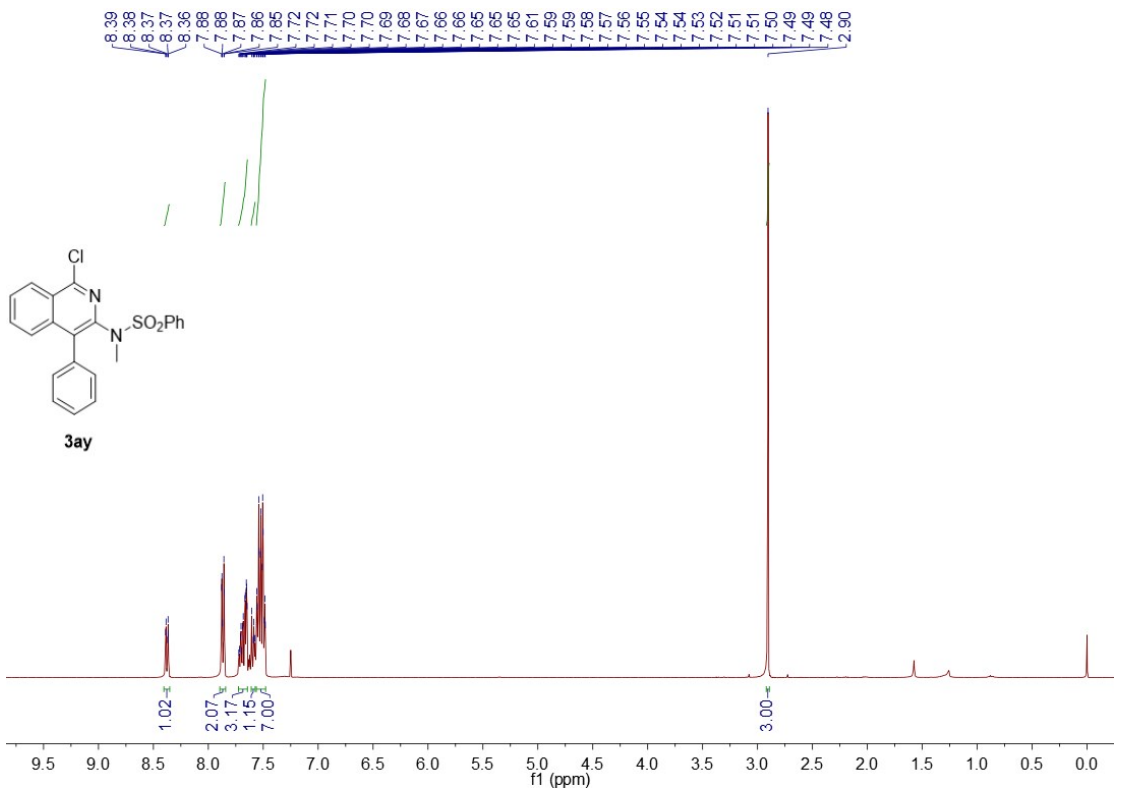

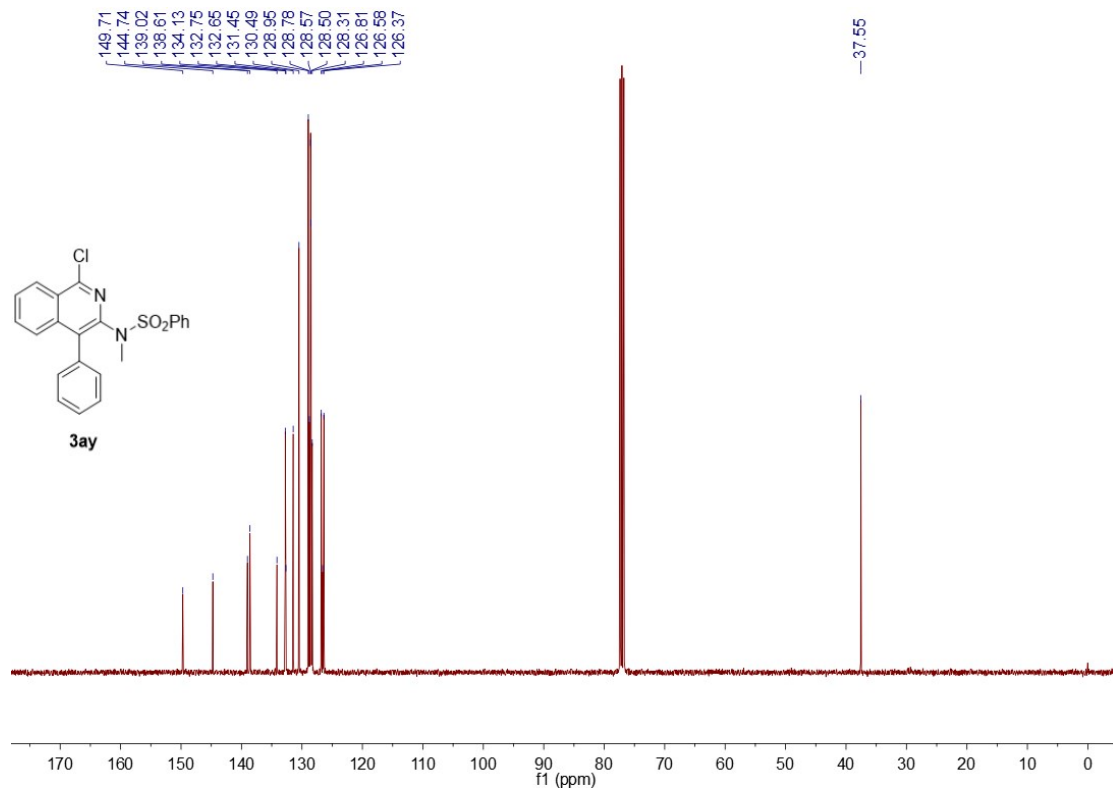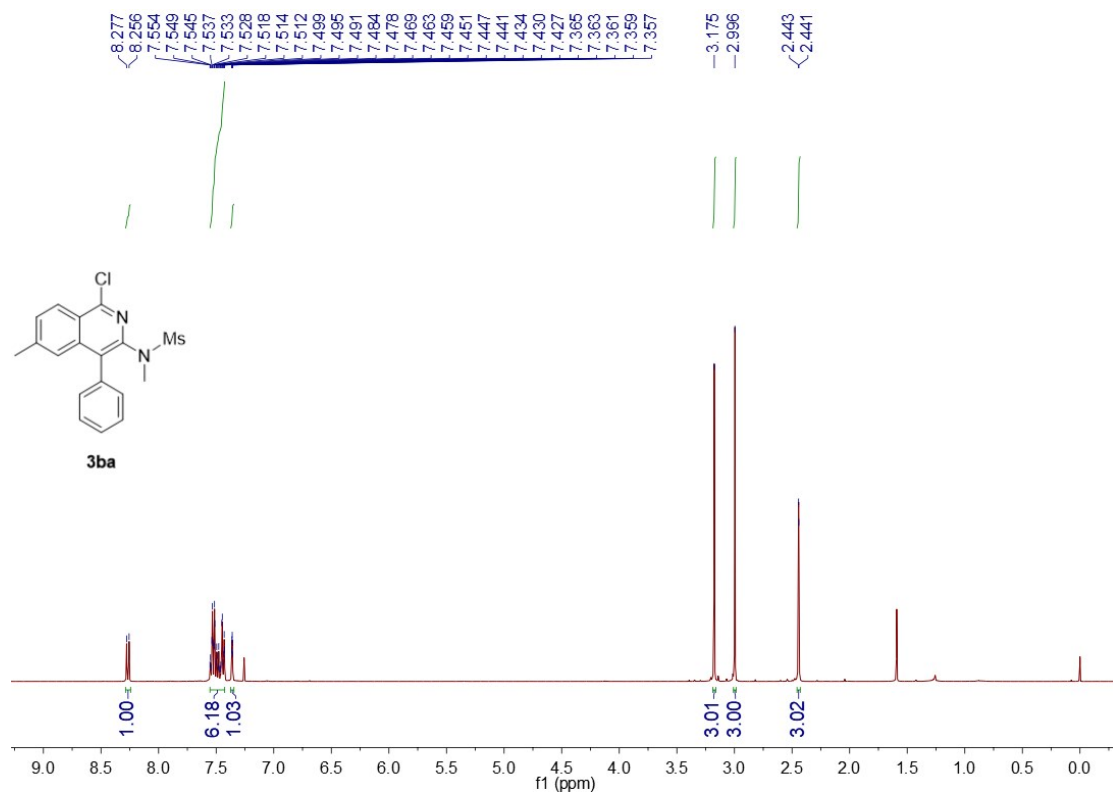

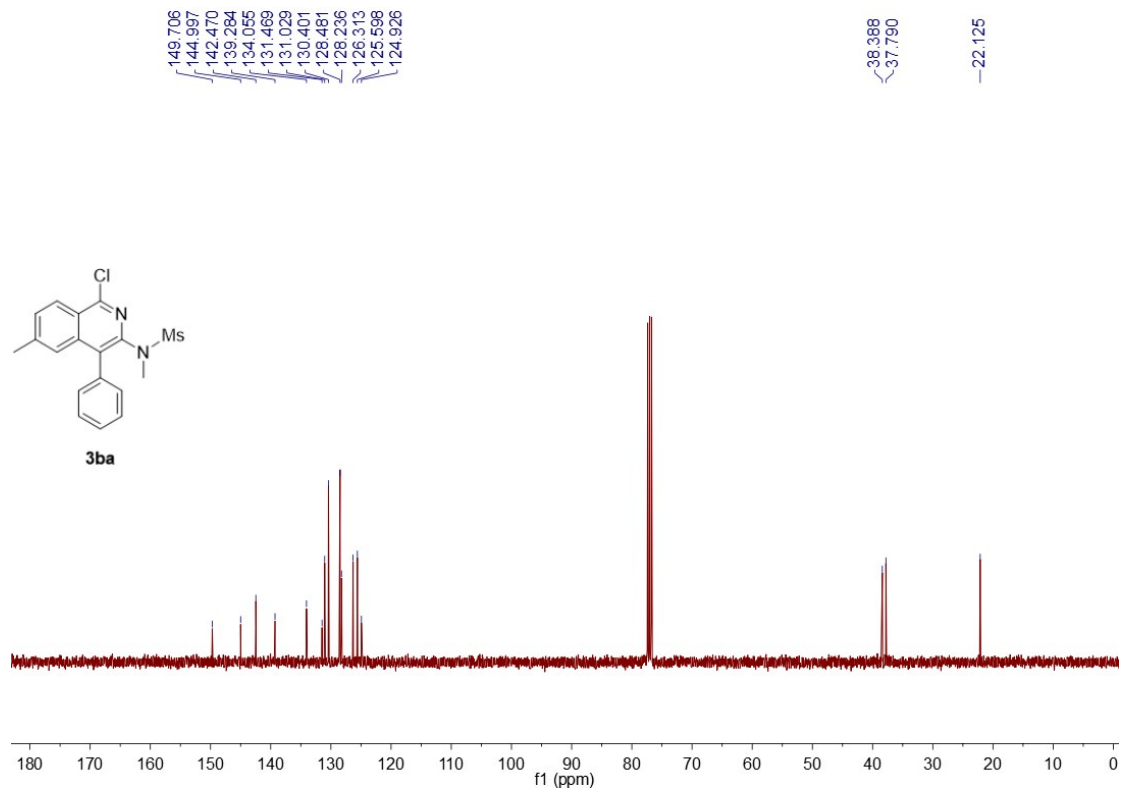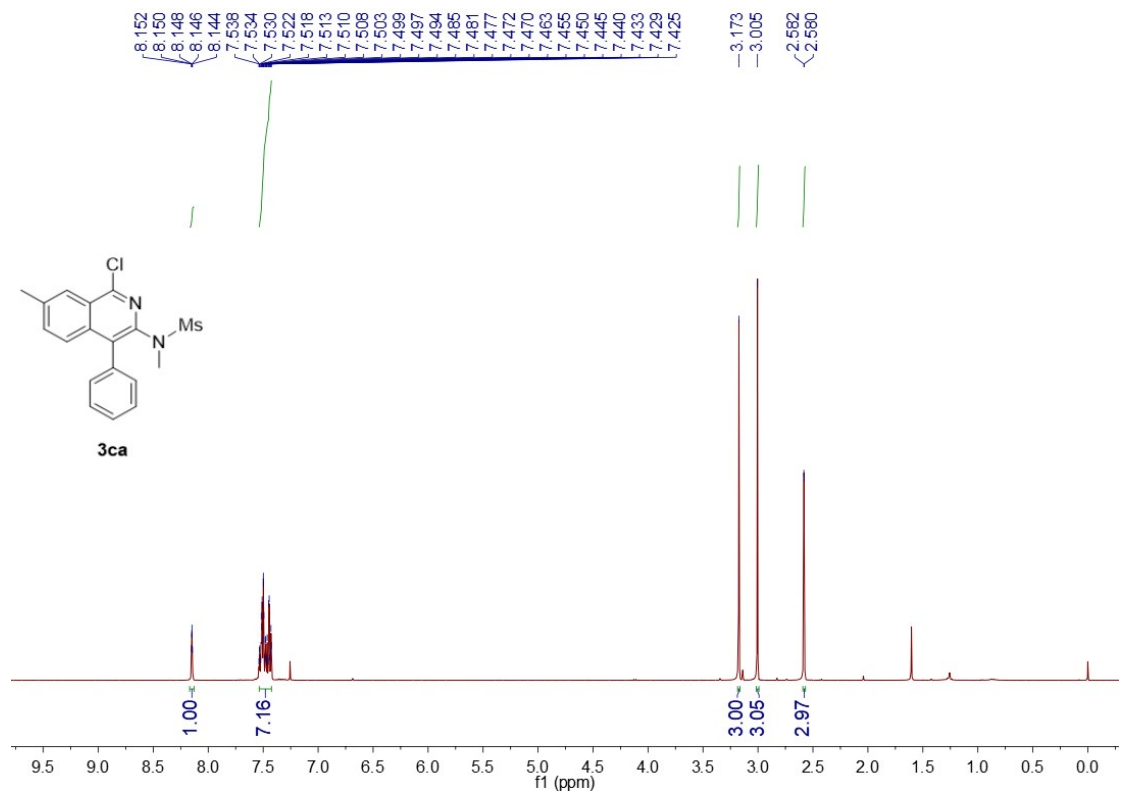

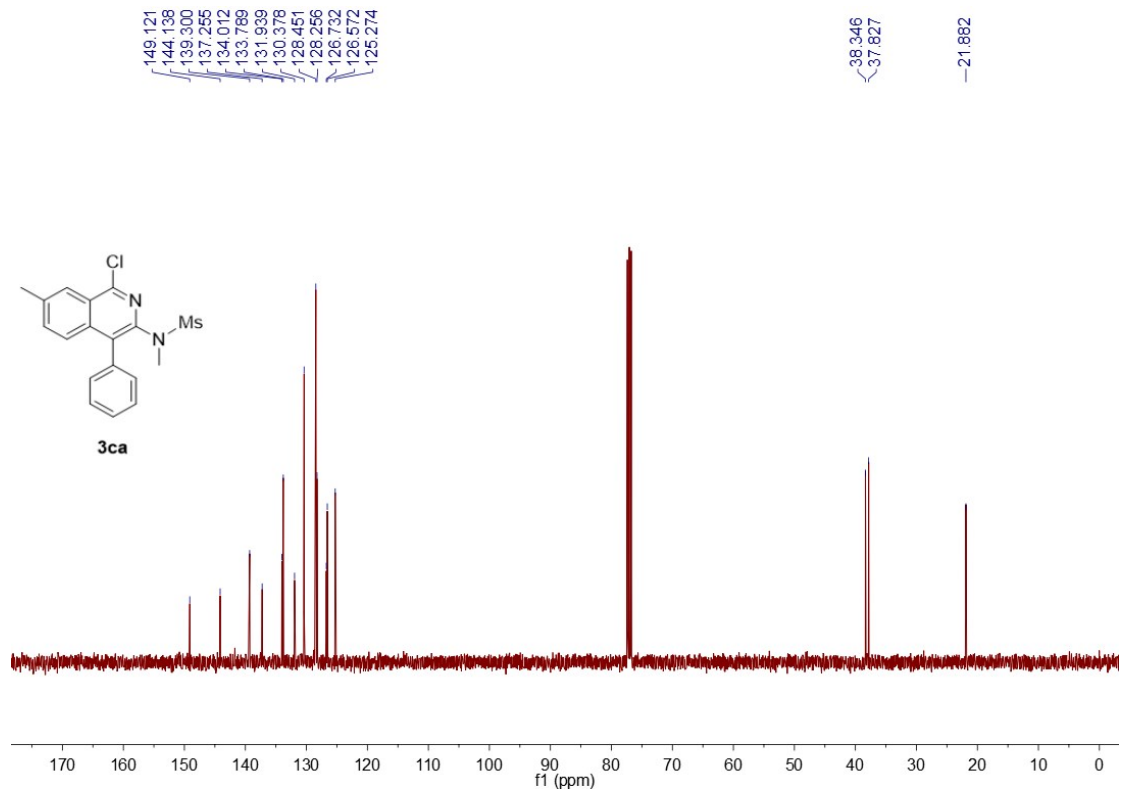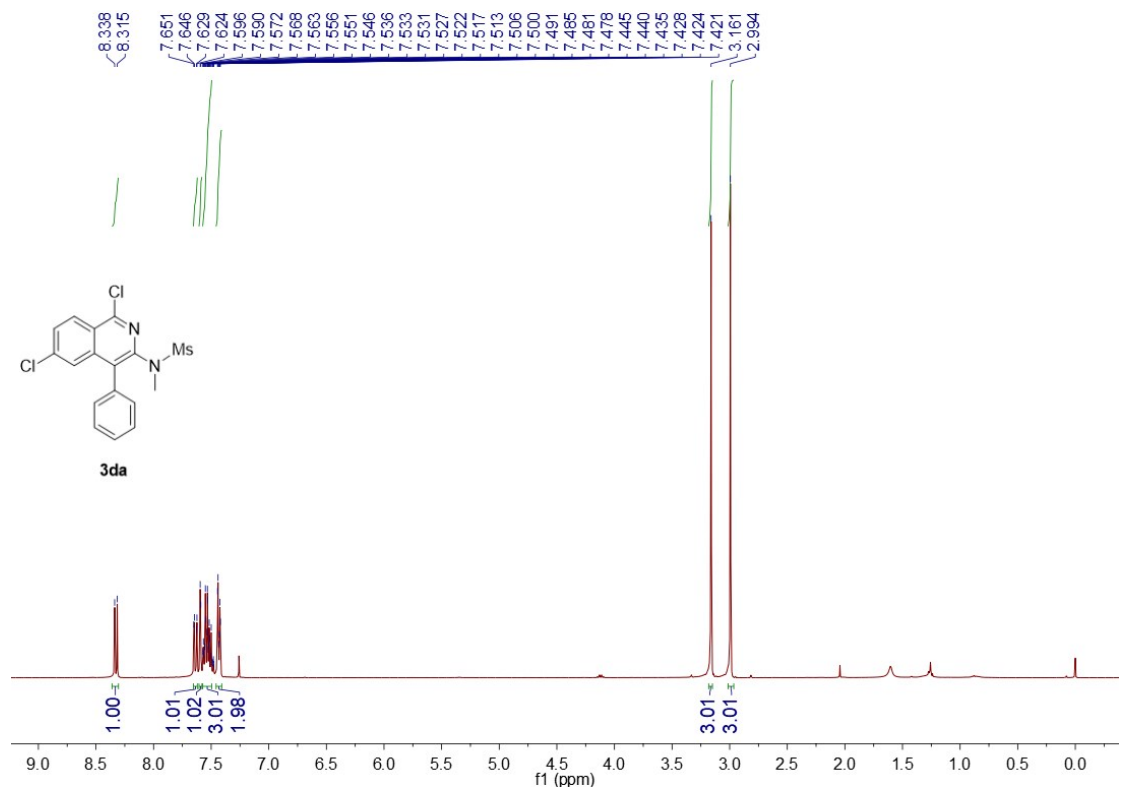

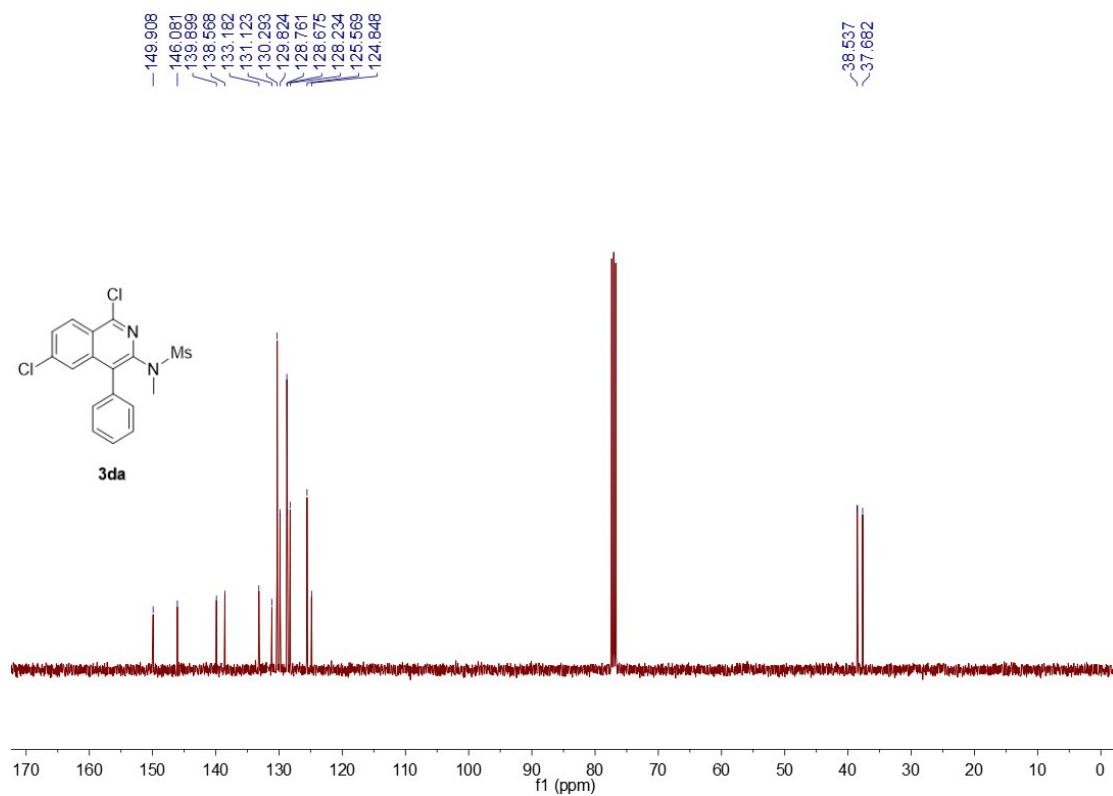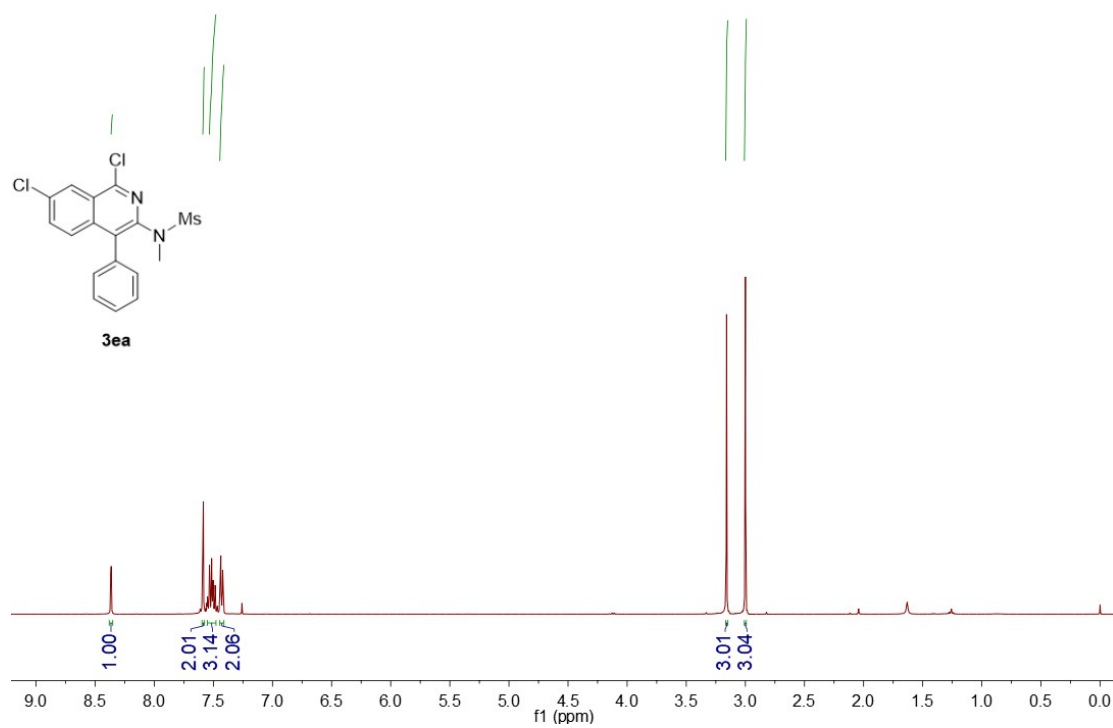

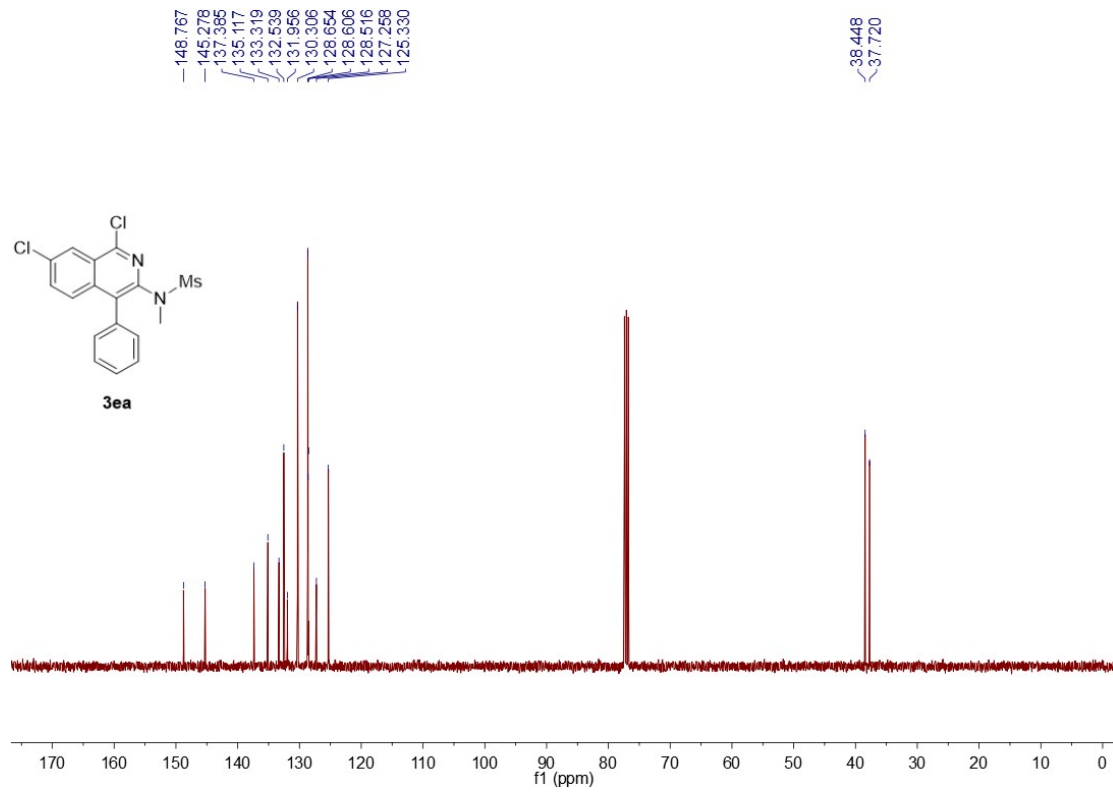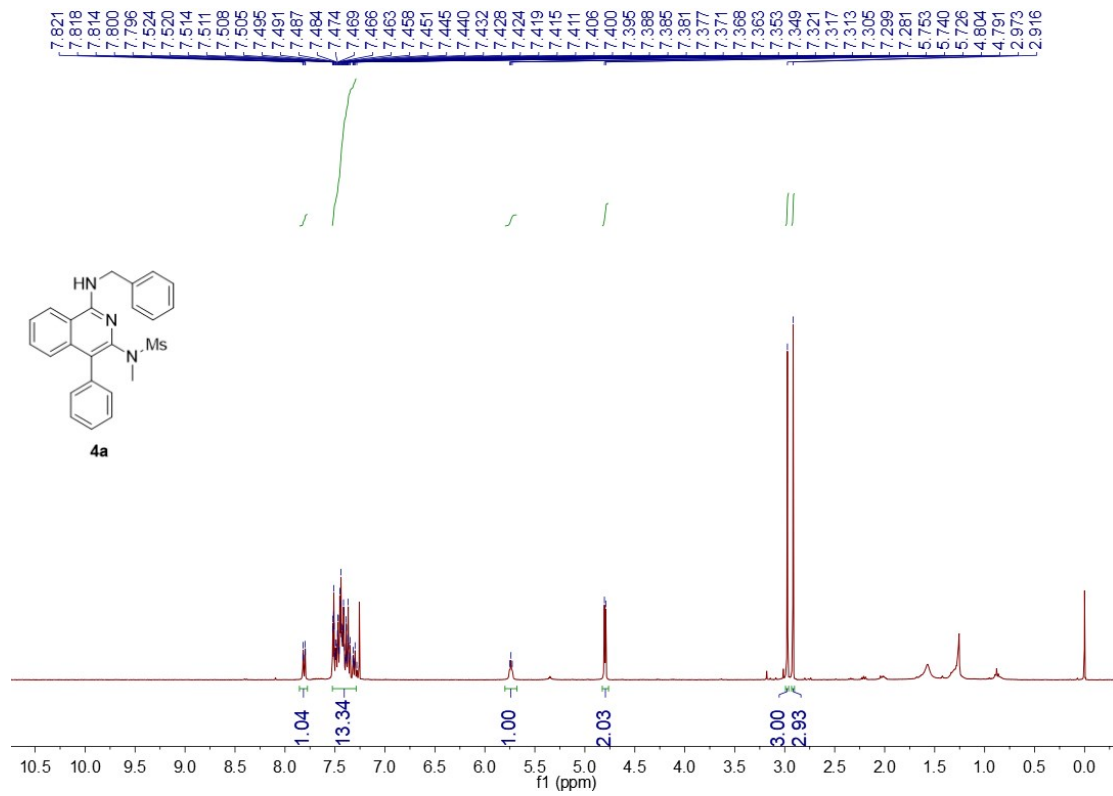

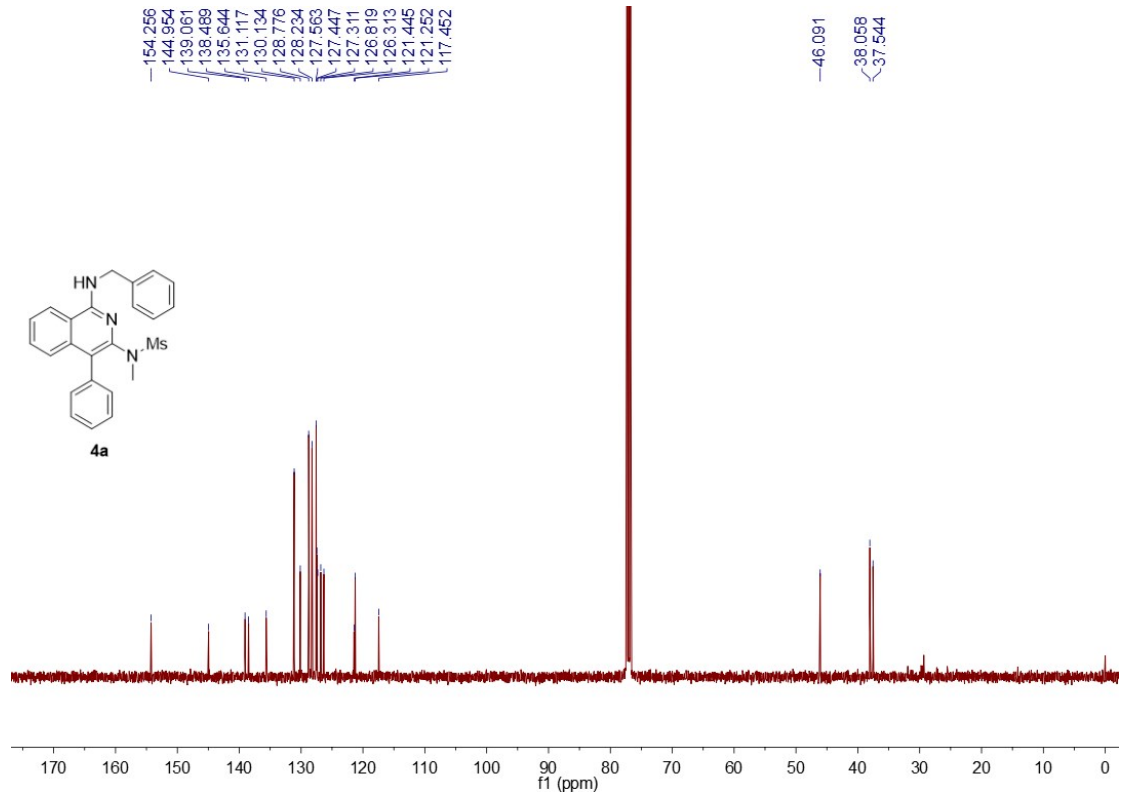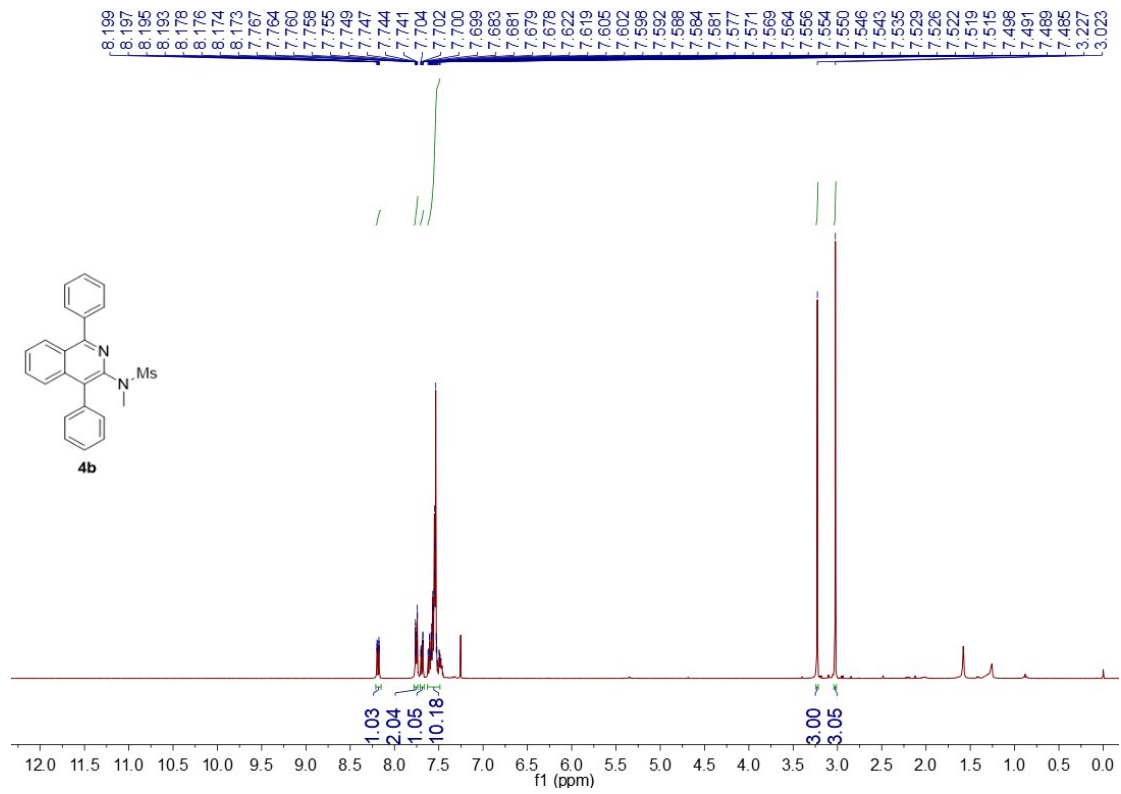

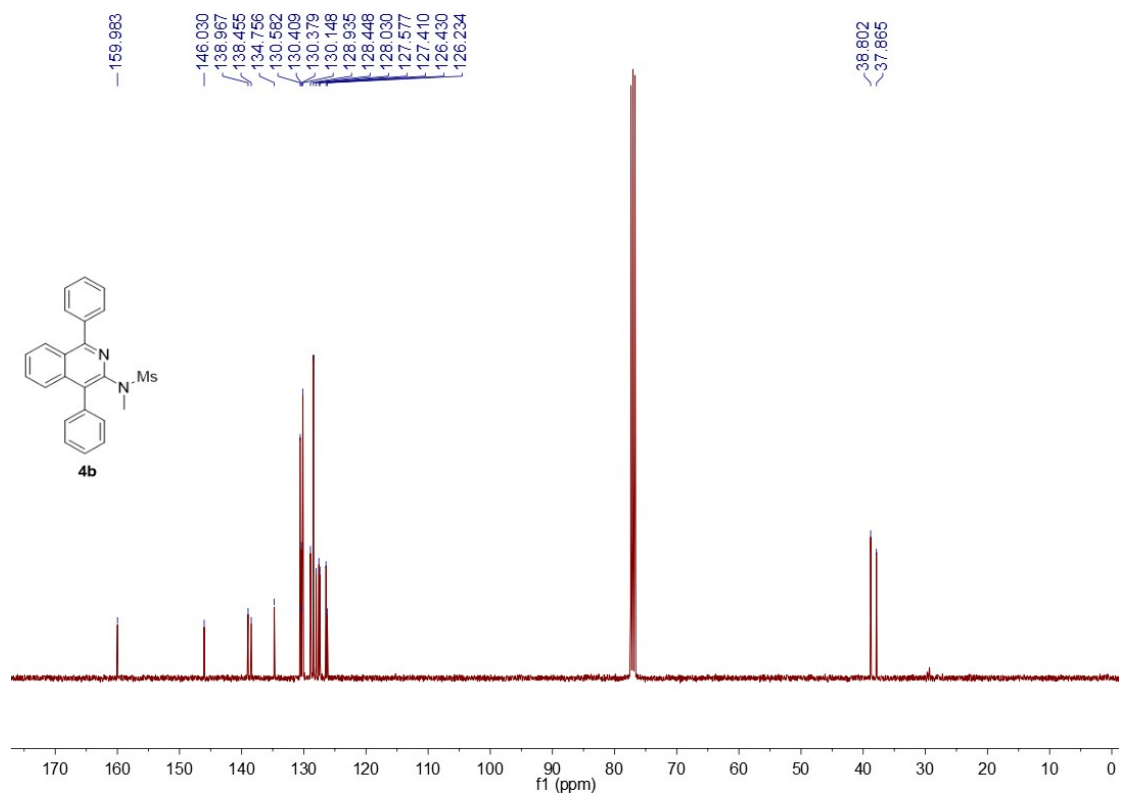



## 7. Cartesian Coordinates and Energies

### Cartesian Coordinates and Energies

1a

| Center<br>Number | Atomic<br>Number | Atomic<br>Type | Coordinates (Angstroms) |           |           |
|------------------|------------------|----------------|-------------------------|-----------|-----------|
|                  |                  |                | X                       | Y         | Z         |
| 1                | 6                | 0              | 0.112516                | -0.414232 | -0.000356 |
| 2                | 6                | 0              | 0.933483                | 0.734074  | -0.000225 |
| 3                | 6                | 0              | 2.329826                | 0.624875  | -0.000044 |
| 4                | 6                | 0              | 2.883368                | -0.649094 | 0.000108  |
| 5                | 6                | 0              | 2.071170                | -1.801421 | 0.000181  |
| 6                | 6                | 0              | 0.689089                | -1.695203 | 0.000007  |
| 7                | 6                | 0              | -1.269599               | 0.003029  | -0.000031 |
| 8                | 1                | 0              | 2.962545                | 1.507303  | 0.000092  |
| 9                | 1                | 0              | 3.964183                | -0.759330 | 0.000034  |
| 10               | 1                | 0              | 2.536636                | -2.782458 | 0.000113  |
| 11               | 1                | 0              | 0.055112                | -2.576384 | 0.000052  |
| 12               | 17               | 0              | -2.578654               | -1.153085 | -0.000025 |
| 13               | 7                | 0              | -1.538373               | 1.270093  | 0.000381  |
| 14               | 16               | 0              | -0.088242               | 2.156906  | -0.000024 |

Zero-point correction= 0.093114 (Hartree/Particle)  
 Thermal correction to Energy= 0.100684  
 Thermal correction to Enthalpy= 0.101628  
 Thermal correction to Gibbs Free Energy= 0.060006  
 Sum of electronic and zero-point Energies= -1182.191468  
 Sum of electronic and thermal Energies= -1182.183898  
 Sum of electronic and thermal Enthalpies= -1182.182954  
 Sum of electronic and thermal Free Energies= -1182.224575  
 M06/6-311++G(d,p)-SDD/SMD//B3LYP/6-31G(d)-LANL2DZ energy in chlorobenzene solvent = -1182.121494

2a

| Center<br>Number | Atomic<br>Number | Atomic<br>Type | Coordinates (Angstroms) |           |           |
|------------------|------------------|----------------|-------------------------|-----------|-----------|
|                  |                  |                | X                       | Y         | Z         |
| 1                | 6                | 0              | 4.065456                | -1.243063 | -0.604216 |
| 2                | 6                | 0              | 2.698511                | -0.979143 | -0.628698 |
| 3                | 6                | 0              | 2.187121                | 0.184402  | -0.020021 |
| 4                | 6                | 0              | 3.082428                | 1.075092  | 0.604084  |
| 5                | 6                | 0              | 4.449682                | 0.810857  | 0.610143  |
| 6                | 6                | 0              | 4.945816                | -0.349194 | 0.010618  |
| 7                | 1                | 0              | 4.446127                | -2.146229 | -1.073565 |
| 8                | 1                | 0              | 2.011808                | -1.665112 | -1.115037 |
| 9                | 1                | 0              | 2.693048                | 1.971134  | 1.077913  |
| 10               | 1                | 0              | 5.129809                | 1.509403  | 1.090205  |
| 11               | 1                | 0              | 6.012586                | -0.555378 | 0.022052  |
| 12               | 6                | 0              | 0.784616                | 0.451839  | -0.036740 |
| 13               | 6                | 0              | -0.412282               | 0.656245  | -0.081981 |
| 14               | 7                | 0              | -1.739174               | 0.905275  | -0.076219 |
| 15               | 6                | 0              | -2.244819               | 2.096844  | -0.787671 |
| 16               | 1                | 0              | -3.311642               | 2.191982  | -0.587650 |
| 17               | 1                | 0              | -1.716018               | 2.967475  | -0.392648 |
| 18               | 1                | 0              | -2.074713               | 2.024239  | -1.867467 |
| 19               | 16               | 0              | -2.782601               | -0.482612 | 0.018080  |
| 20               | 8                | 0              | -4.140384               | 0.045760  | -0.123427 |
| 21               | 8                | 0              | -2.293772               | -1.551673 | -0.851507 |
| 22               | 6                | 0              | -2.500777               | -0.975978 | 1.727171  |
| 23               | 1                | 0              | -3.050355               | -1.907401 | 1.879611  |
| 24               | 1                | 0              | -1.430978               | -1.136233 | 1.871372  |
| 25               | 1                | 0              | -2.875115               | -0.189101 | 2.382815  |

Zero-point correction= 0.193727 (Hartree/Particle)  
 Thermal correction to Energy= 0.207980  
 Thermal correction to Enthalpy= 0.208924  
 Thermal correction to Gibbs Free Energy= 0.149893  
 Sum of electronic and zero-point Energies= -990.745514  
 Sum of electronic and thermal Energies= -990.731261  
 Sum of electronic and thermal Enthalpies= -990.730317  
 Sum of electronic and thermal Free Energies= -990.789348  
 M06/6-311++G(d,p)-SDD/SMD//B3LYP/6-31G(d)-LANL2DZ energy in chlorobenzene solvent = -990.705630

INT1

| Center<br>Number | Atomic<br>Number | Atomic<br>Type | Coordinates (Angstroms) |   |   |
|------------------|------------------|----------------|-------------------------|---|---|
|                  |                  |                | X                       | Y | Z |

|    |    |   |           |           |           |
|----|----|---|-----------|-----------|-----------|
| 1  | 6  | 0 | -1.415386 | 3.782663  | 0.162701  |
| 2  | 6  | 0 | -0.597520 | 2.682685  | 0.408252  |
| 3  | 6  | 0 | 0.793392  | 2.784624  | 0.214746  |
| 4  | 6  | 0 | 1.345804  | 4.008580  | -0.218717 |
| 5  | 6  | 0 | 0.519323  | 5.101881  | -0.457386 |
| 6  | 6  | 0 | -0.862323 | 4.990201  | -0.268456 |
| 7  | 1  | 0 | -2.487083 | 3.679891  | 0.301977  |
| 8  | 1  | 0 | -1.034221 | 1.749169  | 0.733524  |
| 9  | 1  | 0 | 2.419303  | 4.087326  | -0.362993 |
| 10 | 1  | 0 | 0.950826  | 6.041132  | -0.791786 |
| 11 | 1  | 0 | -1.505354 | 5.844635  | -0.461031 |
| 12 | 6  | 0 | 1.663969  | 1.672222  | 0.457467  |
| 13 | 6  | 0 | 2.540234  | 0.839401  | 0.646867  |
| 14 | 7  | 0 | 3.534953  | -0.024177 | 0.956604  |
| 15 | 6  | 0 | 3.694116  | -0.446405 | 2.371510  |
| 16 | 1  | 0 | 4.587603  | -1.064336 | 2.453119  |
| 17 | 1  | 0 | 3.815575  | 0.461000  | 2.965516  |
| 18 | 1  | 0 | 2.819686  | -1.003758 | 2.723560  |
| 19 | 16 | 0 | 3.935569  | -1.186920 | -0.263156 |
| 20 | 8  | 0 | 4.821864  | -2.163903 | 0.357678  |
| 21 | 8  | 0 | 2.693598  | -1.641692 | -0.932768 |
| 22 | 6  | 0 | 4.829372  | -0.177376 | -1.449893 |
| 23 | 1  | 0 | 5.034410  | -0.814532 | -2.313272 |
| 24 | 1  | 0 | 4.197308  | 0.664953  | -1.737312 |
| 25 | 1  | 0 | 5.755170  | 0.160522  | -0.982350 |
| 26 | 47 | 0 | 0.538602  | -0.812835 | -0.375120 |
| 27 | 51 | 0 | -2.658498 | -0.803611 | 0.062021  |
| 28 | 9  | 0 | -1.262465 | -0.410979 | 1.318585  |
| 29 | 9  | 0 | -3.561054 | -1.777298 | 1.341852  |
| 30 | 9  | 0 | -3.860618 | -1.194380 | -1.280031 |
| 31 | 9  | 0 | -1.552624 | 0.138075  | -1.185771 |
| 32 | 9  | 0 | -1.549584 | -2.279326 | -0.391080 |
| 33 | 9  | 0 | -3.456709 | 0.807825  | 0.513229  |

-----

Zero-point correction= 0.209211 (Hartree/Particle)  
Thermal correction to Energy= 0.235746  
Thermal correction to Enthalpy= 0.236690  
Thermal correction to Gibbs Free Energy= 0.147728  
Sum of electronic and zero-point Energies= -1741.109166  
Sum of electronic and thermal Energies= -1741.082630  
Sum of electronic and thermal Enthalpies= -1741.081686  
Sum of electronic and thermal Free Energies= -1741.170649  
M06/6-311++G(d,p)-SDD/SMD/B3LYP/6-31G(d)-LANL2DZ energy in chlorobenzene solvent = -1742.336697

#### TS1a

| Center Number | Atomic Number | Atomic Type | Coordinates (Angstroms) |           |           |
|---------------|---------------|-------------|-------------------------|-----------|-----------|
|               |               |             | X                       | Y         | Z         |
| 1             | 6             | 0           | -4.076362               | -3.879452 | -0.315508 |
| 2             | 6             | 0           | -3.103090               | -2.889382 | -0.447172 |
| 3             | 6             | 0           | -3.075412               | -1.786548 | 0.427034  |
| 4             | 6             | 0           | -4.030718               | -1.728689 | 1.459552  |
| 5             | 6             | 0           | -4.984081               | -2.735739 | 1.605720  |
| 6             | 6             | 0           | -5.018332               | -3.809986 | 0.713663  |
| 7             | 1             | 0           | -4.084059               | -4.717313 | -1.007304 |
| 8             | 1             | 0           | -2.352826               | -2.962824 | -1.230059 |
| 9             | 1             | 0           | -4.005470               | -0.902666 | 2.164415  |
| 10            | 1             | 0           | -5.700668               | -2.681581 | 2.421090  |
| 11            | 1             | 0           | -5.761832               | -4.593560 | 0.828731  |
| 12            | 6             | 0           | -2.048477               | -0.726236 | 0.244672  |
| 13            | 6             | 0           | -2.413645               | 0.522696  | 0.349962  |
| 14            | 7             | 0           | -3.407001               | 1.402628  | 0.338650  |
| 15            | 6             | 0           | -3.585011               | 2.385193  | 1.424240  |
| 16            | 1             | 0           | -4.569657               | 2.842201  | 1.334740  |
| 17            | 1             | 0           | -3.499710               | 1.854296  | 2.373991  |
| 18            | 1             | 0           | -2.814697               | 3.161113  | 1.367851  |
| 19            | 16            | 0           | -4.095921               | 1.826663  | -1.248991 |
| 20            | 8             | 0           | -4.915964               | 3.012479  | -1.010419 |
| 21            | 8             | 0           | -3.011913               | 1.821074  | -2.228797 |
| 22            | 6             | 0           | -5.160061               | 0.407898  | -1.555922 |
| 23            | 1             | 0           | -5.621628               | 0.580003  | -2.531572 |
| 24            | 1             | 0           | -4.554048               | -0.498932 | -1.569195 |
| 25            | 1             | 0           | -5.915711               | 0.363546  | -0.770612 |
| 26            | 6             | 0           | 1.386916                | 2.429204  | 0.933253  |
| 27            | 6             | 0           | 1.378271                | 2.781160  | -0.434203 |
| 28            | 6             | 0           | 2.492949                | 3.382333  | -1.032446 |
| 29            | 6             | 0           | 3.607076                | 3.610110  | -0.237761 |
| 30            | 6             | 0           | 3.625075                | 3.259489  | 1.129224  |

|    |    |   |           |           |           |
|----|----|---|-----------|-----------|-----------|
| 31 | 6  | 0 | 2.524412  | 2.672180  | 1.724835  |
| 32 | 6  | 0 | 0.137189  | 1.817212  | 1.269979  |
| 33 | 1  | 0 | 2.494232  | 3.642211  | -2.086025 |
| 34 | 1  | 0 | 4.491235  | 4.058036  | -0.681559 |
| 35 | 1  | 0 | 4.522012  | 3.439666  | 1.712879  |
| 36 | 1  | 0 | 2.533029  | 2.381345  | 2.769819  |
| 37 | 17 | 0 | -0.230475 | 1.255183  | 2.864860  |
| 38 | 7  | 0 | -0.742355 | 1.693672  | 0.307182  |
| 39 | 16 | 0 | -0.144752 | 2.340614  | -1.160662 |
| 40 | 47 | 0 | -0.025186 | -1.349196 | -0.132842 |
| 41 | 51 | 0 | 3.239479  | -1.190170 | -0.299519 |
| 42 | 9  | 0 | 1.913864  | -2.576071 | -0.479006 |
| 43 | 9  | 0 | 4.230117  | -2.266168 | 0.827868  |
| 44 | 9  | 0 | 4.346956  | 0.279084  | -0.096982 |
| 45 | 9  | 0 | 2.033756  | -0.181507 | -1.360917 |
| 46 | 9  | 0 | 2.166190  | -0.621471 | 1.160404  |
| 47 | 9  | 0 | 4.098815  | -1.798351 | -1.816718 |

-----  
Zero-point correction= 0.302506 (Hartree/Particle)  
Thermal correction to Energy= 0.337507  
Thermal correction to Enthalpy= 0.338452  
Thermal correction to Gibbs Free Energy= 0.229876  
Sum of electronic and zero-point Energies= -2923.263615  
Sum of electronic and thermal Energies= -2923.228614  
Sum of electronic and thermal Enthalpies= -2923.227670  
Sum of electronic and thermal Free Energies= -2923.336246  
M06/6-311++G(d,p)-SDD/SMD//B3LYP/6-31G(d)-LANL2DZ energy in chlorobenzene solvent = -2924.451937

**TS1a'**

| Center<br>Number | Atomic<br>Number | Atomic<br>Type | Coordinates (Angstroms) |           |           |
|------------------|------------------|----------------|-------------------------|-----------|-----------|
|                  |                  |                | X                       | Y         | Z         |
| 1                | 6                | 0              | -0.082351               | -3.359340 | 1.626552  |
| 2                | 6                | 0              | -0.214212               | -2.137228 | 0.970380  |
| 3                | 6                | 0              | 0.731352                | -1.110961 | 1.173046  |
| 4                | 6                | 0              | 1.778590                | -1.338165 | 2.089972  |
| 5                | 6                | 0              | 1.888732                | -2.553779 | 2.763527  |
| 6                | 6                | 0              | 0.965267                | -3.574131 | 2.525696  |
| 7                | 1                | 0              | -0.819085               | -4.137946 | 1.450361  |
| 8                | 1                | 0              | -1.054334               | -1.970724 | 0.303039  |
| 9                | 1                | 0              | 2.491220                | -0.544720 | 2.298932  |
| 10               | 1                | 0              | 2.693723                | -2.701348 | 3.479182  |
| 11               | 1                | 0              | 1.050170                | -4.521362 | 3.051221  |
| 12               | 6                | 0              | 0.584320                | 0.174238  | 0.480224  |
| 13               | 6                | 0              | 1.496901                | 0.933797  | -0.070321 |
| 14               | 7                | 0              | 1.668613                | 2.227689  | -0.500226 |
| 15               | 6                | 0              | 1.695595                | 2.485842  | -1.956922 |
| 16               | 1                | 0              | 1.971931                | 3.526520  | -2.127450 |
| 17               | 1                | 0              | 2.455726                | 1.836976  | -2.398760 |
| 18               | 1                | 0              | 0.722585                | 2.269956  | -2.412723 |
| 19               | 16               | 0              | 0.994724                | 3.534757  | 0.435282  |
| 20               | 8                | 0              | 1.662241                | 4.736072  | -0.064457 |
| 21               | 8                | 0              | -0.471314               | 3.471251  | 0.435214  |
| 22               | 6                | 0              | 1.579893                | 3.160586  | 2.095899  |
| 23               | 1                | 0              | 1.173372                | 3.956935  | 2.723966  |
| 24               | 1                | 0              | 1.191049                | 2.194065  | 2.415518  |
| 25               | 1                | 0              | 2.670375                | 3.187896  | 2.104848  |
| 26               | 6                | 0              | 4.848038                | -1.222837 | -0.867675 |
| 27               | 6                | 0              | 5.570964                | -0.269874 | -0.116052 |
| 28               | 6                | 0              | 6.951868                | -0.394998 | 0.078048  |
| 29               | 6                | 0              | 7.586980                | -1.491222 | -0.492740 |
| 30               | 6                | 0              | 6.875022                | -2.448386 | -1.245716 |
| 31               | 6                | 0              | 5.509773                | -2.324035 | -1.441172 |
| 32               | 6                | 0              | 3.459557                | -0.859771 | -0.921027 |
| 33               | 1                | 0              | 7.509603                | 0.336228  | 0.654124  |
| 34               | 1                | 0              | 8.657360                | -1.612612 | -0.355235 |
| 35               | 1                | 0              | 7.406334                | -3.291571 | -1.675218 |
| 36               | 1                | 0              | 4.950927                | -3.054168 | -2.017173 |
| 37               | 17               | 0              | 2.297746                | -1.759194 | -1.804048 |
| 38               | 7                | 0              | 3.131507                | 0.234366  | -0.273385 |
| 39               | 16               | 0              | 4.497022                | 0.984704  | 0.452746  |
| 40               | 47               | 0              | -1.468385               | 0.873957  | 0.146468  |
| 41               | 51               | 0              | -4.345036               | -0.633761 | -0.344188 |
| 42               | 9                | 0              | -5.172222               | -0.511805 | -1.992978 |
| 43               | 9                | 0              | -3.647069               | 1.150489  | -0.571813 |
| 44               | 9                | 0              | -5.804639               | 0.061768  | 0.551174  |
| 45               | 9                | 0              | -3.333270               | -0.621059 | 1.257649  |
| 46               | 9                | 0              | -4.845777               | -2.391862 | -0.066150 |
| 47               | 9                | 0              | -2.738760               | -1.192504 | -1.185187 |

-----  
 Zero-point correction= 0.302972 (Hartree/Particle)  
 Thermal correction to Energy= 0.337793  
 Thermal correction to Enthalpy= 0.338737  
 Thermal correction to Gibbs Free Energy= 0.229801  
 Sum of electronic and zero-point Energies= -2923.255693  
 Sum of electronic and thermal Energies= -2923.220872  
 Sum of electronic and thermal Enthalpies= -2923.219928  
 Sum of electronic and thermal Free Energies= -2923.328865  
 M06/6-311++G(d,p)-SDD/SMD//B3LYP/6-31G(d)-LANL2DZ energy in chlorobenzene solvent = -2924.449833

**TS1b**

-----

| Center<br>Number | Atomic<br>Number | Atomic<br>Type | Coordinates (Angstroms) |           |           |
|------------------|------------------|----------------|-------------------------|-----------|-----------|
|                  |                  |                | X                       | Y         | Z         |
| 1                | 6                | 0              | -0.771335               | -3.311004 | 0.089520  |
| 2                | 6                | 0              | -0.276577               | -2.054393 | -0.259467 |
| 3                | 6                | 0              | 0.792582                | -1.482635 | 0.453684  |
| 4                | 6                | 0              | 1.383953                | -2.225039 | 1.495839  |
| 5                | 6                | 0              | 0.912366                | -3.494202 | 1.815810  |
| 6                | 6                | 0              | -0.172657               | -4.037101 | 1.118571  |
| 7                | 1                | 0              | -1.643934               | -3.696693 | -0.428529 |
| 8                | 1                | 0              | -0.757314               | -1.496231 | -1.054223 |
| 9                | 1                | 0              | 2.201679                | -1.793550 | 2.065934  |
| 10               | 1                | 0              | 1.374052                | -4.052056 | 2.626062  |
| 11               | 1                | 0              | -0.556478               | -5.016943 | 1.388757  |
| 12               | 6                | 0              | 1.243927                | -0.123472 | 0.148772  |
| 13               | 6                | 0              | 0.779214                | 1.088744  | -0.009247 |
| 14               | 7                | 0              | 1.343947                | 2.263518  | -0.455210 |
| 15               | 6                | 0              | 2.520772                | 2.340456  | -1.337313 |
| 16               | 1                | 0              | 2.498748                | 3.288053  | -1.873158 |
| 17               | 1                | 0              | 3.457324                | 2.277616  | -0.773703 |
| 18               | 1                | 0              | 2.467947                | 1.520693  | -2.057723 |
| 19               | 16               | 0              | 0.482553                | 3.731828  | -0.164796 |
| 20               | 8                | 0              | 1.209825                | 4.780893  | -0.878864 |
| 21               | 8                | 0              | -0.951263               | 3.527249  | -0.408534 |
| 22               | 6                | 0              | 0.702127                | 3.972568  | 1.607691  |
| 23               | 1                | 0              | 0.136159                | 4.867301  | 1.877643  |
| 24               | 1                | 0              | 0.312682                | 3.100266  | 2.135449  |
| 25               | 1                | 0              | 1.765680                | 4.112225  | 1.808269  |
| 26               | 6                | 0              | 5.366958                | -0.627266 | 0.114893  |
| 27               | 6                | 0              | 5.197546                | -1.417602 | -1.044893 |
| 28               | 6                | 0              | 6.285541                | -2.065196 | -1.644245 |
| 29               | 6                | 0              | 7.535376                | -1.905924 | -1.059436 |
| 30               | 6                | 0              | 7.714198                | -1.120655 | 0.099291  |
| 31               | 6                | 0              | 6.640805                | -0.479072 | 0.693875  |
| 32               | 6                | 0              | 4.098412                | -0.088355 | 0.518023  |
| 33               | 1                | 0              | 6.158542                | -2.672894 | -2.534362 |
| 34               | 1                | 0              | 8.394626                | -2.398516 | -1.504872 |
| 35               | 1                | 0              | 8.706455                | -1.020641 | 0.527486  |
| 36               | 1                | 0              | 6.766939                | 0.126682  | 1.585333  |
| 37               | 17               | 0              | 3.905775                | 0.905375  | 1.915859  |
| 38               | 7                | 0              | 3.069044                | -0.398776 | -0.227868 |
| 39               | 16               | 0              | 3.518994                | -1.417127 | -1.527373 |
| 40               | 47               | 0              | -1.467836               | 1.018875  | 0.190724  |
| 41               | 51               | 0              | -4.192413               | -0.737810 | -0.195058 |
| 42               | 9                | 0              | -2.788556               | -0.549012 | -1.466928 |
| 43               | 9                | 0              | -4.215090               | -2.564144 | -0.520465 |
| 44               | 9                | 0              | -5.435996               | -0.340516 | -1.501426 |
| 45               | 9                | 0              | -5.475812               | -0.813141 | 1.132010  |
| 46               | 9                | 0              | -3.879275               | 1.120306  | 0.143690  |
| 47               | 9                | 0              | -2.825649               | -0.983288 | 1.099027  |

-----

Zero-point correction= 0.302749 (Hartree/Particle)  
 Thermal correction to Energy= 0.337674  
 Thermal correction to Enthalpy= 0.338619  
 Thermal correction to Gibbs Free Energy= 0.229543  
 Sum of electronic and zero-point Energies= -2923.254220  
 Sum of electronic and thermal Energies= -2923.219294  
 Sum of electronic and thermal Enthalpies= -2923.218350  
 Sum of electronic and thermal Free Energies= -2923.327426  
 M06/6-311++G(d,p)-SDD/SMD//B3LYP/6-31G(d)-LANL2DZ energy in chlorobenzene solvent = -2924.443123

**TS1b'**

-----

| Center<br>Number | Atomic<br>Number | Atomic<br>Type | Coordinates (Angstroms) |          |          |
|------------------|------------------|----------------|-------------------------|----------|----------|
|                  |                  |                | X                       | Y        | Z        |
| 1                | 6                | 0              | -4.643184               | 3.682165 | 0.356754 |

-----

|    |    |   |           |           |           |
|----|----|---|-----------|-----------|-----------|
| 2  | 6  | 0 | -3.751510 | 2.670256  | 0.692827  |
| 3  | 6  | 0 | -3.421355 | 1.669090  | -0.244703 |
| 4  | 6  | 0 | -3.999687 | 1.722313  | -1.530327 |
| 5  | 6  | 0 | -4.906095 | 2.730496  | -1.855744 |
| 6  | 6  | 0 | -5.226035 | 3.712076  | -0.916125 |
| 7  | 1  | 0 | -4.892310 | 4.447263  | 1.086518  |
| 8  | 1  | 0 | -3.300462 | 2.640303  | 1.679822  |
| 9  | 1  | 0 | -3.724761 | 0.969992  | -2.263117 |
| 10 | 1  | 0 | -5.350234 | 2.757027  | -2.846631 |
| 11 | 1  | 0 | -5.924322 | 4.503481  | -1.173873 |
| 12 | 6  | 0 | -2.581362 | 0.550970  | 0.095250  |
| 13 | 6  | 0 | -2.326975 | -0.716586 | 0.138730  |
| 14 | 7  | 0 | -3.269287 | -1.733217 | 0.133808  |
| 15 | 6  | 0 | -4.709272 | -1.433471 | 0.183404  |
| 16 | 1  | 0 | -5.275061 | -2.363522 | 0.182260  |
| 17 | 1  | 0 | -4.948329 | -0.842781 | 1.076823  |
| 18 | 1  | 0 | -4.979363 | -0.855091 | -0.704022 |
| 19 | 16 | 0 | -2.777139 | -3.334113 | 0.511753  |
| 20 | 8  | 0 | -3.922385 | -4.195331 | 0.225658  |
| 21 | 8  | 0 | -1.480143 | -3.571098 | -0.135605 |
| 22 | 6  | 0 | -2.492792 | -3.319556 | 2.294413  |
| 23 | 1  | 0 | -2.144919 | -4.317672 | 2.570681  |
| 24 | 1  | 0 | -1.729827 | -2.573563 | 2.524680  |
| 25 | 1  | 0 | -3.434441 | -3.091135 | 2.797761  |
| 26 | 6  | 0 | 1.207149  | 2.783554  | 0.348610  |
| 27 | 6  | 0 | 1.222921  | 2.390415  | 1.704598  |
| 28 | 6  | 0 | 2.291754  | 2.724460  | 2.543472  |
| 29 | 6  | 0 | 3.338325  | 3.454380  | 1.995476  |
| 30 | 6  | 0 | 3.332686  | 3.850289  | 0.642539  |
| 31 | 6  | 0 | 2.276467  | 3.519967  | -0.188617 |
| 32 | 6  | 0 | 0.012258  | 2.290486  | -0.278469 |
| 33 | 1  | 0 | 2.312423  | 2.411244  | 3.582302  |
| 34 | 1  | 0 | 4.185975  | 3.716046  | 2.622023  |
| 35 | 1  | 0 | 4.175704  | 4.407729  | 0.247013  |
| 36 | 1  | 0 | 2.269408  | 3.803150  | -1.235859 |
| 37 | 17 | 0 | -0.363427 | 2.576331  | -1.939054 |
| 38 | 7  | 0 | -0.802155 | 1.598346  | 0.471861  |
| 39 | 16 | 0 | -0.217731 | 1.471800  | 2.069507  |
| 40 | 47 | 0 | -0.190225 | -1.356571 | -0.232824 |
| 41 | 51 | 0 | 3.042309  | -0.918095 | -0.466577 |
| 42 | 9  | 0 | 1.674095  | 0.119170  | -1.293282 |
| 43 | 9  | 0 | 3.926173  | 0.636144  | 0.020299  |
| 44 | 9  | 0 | 3.929384  | -1.065179 | -2.079471 |
| 45 | 9  | 0 | 4.222797  | -2.024997 | 0.423136  |
| 46 | 9  | 0 | 1.912414  | -2.391820 | -0.899099 |
| 47 | 9  | 0 | 1.959585  | -0.789285 | 1.095403  |

-----  
Zero-point correction= 0.302264 (Hartree/Particle)  
Thermal correction to Energy= 0.337388  
Thermal correction to Enthalpy= 0.338332  
Thermal correction to Gibbs Free Energy= 0.228705  
Sum of electronic and zero-point Energies= -2923.253343  
Sum of electronic and thermal Energies= -2923.218219  
Sum of electronic and thermal Enthalpies= -2923.217275  
Sum of electronic and thermal Free Energies= -2923.326902  
M06/6-311++G(d,p)-SDD/SMD/B3LYP/6-31G(d)-LANL2DZ energy in chlorobenzene solvent = -2924.439698

#### TS1c

| Center<br>Number | Atomic<br>Number | Atomic<br>Type | Coordinates (Angstroms) |          |           |
|------------------|------------------|----------------|-------------------------|----------|-----------|
|                  |                  |                | X                       | Y        | Z         |
| 1                | 6                | 0              | 1.234890                | 5.352976 | 0.326738  |
| 2                | 6                | 0              | 0.819813                | 4.102510 | -0.125505 |
| 3                | 6                | 0              | 1.427801                | 2.925922 | 0.353181  |
| 4                | 6                | 0              | 2.435991                | 3.040511 | 1.328870  |
| 5                | 6                | 0              | 2.830839                | 4.294054 | 1.796501  |
| 6                | 6                | 0              | 2.240747                | 5.454087 | 1.291953  |
| 7                | 1                | 0              | 0.759940                | 6.248999 | -0.063502 |
| 8                | 1                | 0              | 0.021660                | 4.027645 | -0.860021 |
| 9                | 1                | 0              | 2.885585                | 2.144973 | 1.744773  |
| 10               | 1                | 0              | 3.603898                | 4.359821 | 2.556988  |
| 11               | 1                | 0              | 2.550964                | 6.429015 | 1.657341  |
| 12               | 6                | 0              | 0.987311                | 1.602644 | -0.161601 |
| 13               | 6                | 0              | 1.921156                | 0.723233 | -0.494422 |
| 14               | 7                | 0              | 3.196347                | 0.728345 | -0.941877 |
| 15               | 6                | 0              | 3.593505                | 1.715713 | -1.969833 |
| 16               | 1                | 0              | 4.545061                | 1.422210 | -2.417524 |
| 17               | 1                | 0              | 2.826179                | 1.719695 | -2.745921 |
| 18               | 1                | 0              | 3.689008                | 2.712978 | -1.532635 |

|    |    |   |           |           |           |
|----|----|---|-----------|-----------|-----------|
| 19 | 16 | 0 | 4.470907  | 0.113627  | 0.091202  |
| 20 | 8  | 0 | 5.328868  | 1.235493  | 0.471313  |
| 21 | 8  | 0 | 3.788718  | -0.704345 | 1.092217  |
| 22 | 6  | 0 | 5.399966  | -0.950029 | -1.028464 |
| 23 | 1  | 0 | 6.134275  | -1.468840 | -0.407300 |
| 24 | 1  | 0 | 4.713475  | -1.654709 | -1.497610 |
| 25 | 1  | 0 | 5.912568  | -0.335363 | -1.769641 |
| 26 | 6  | 0 | 1.457131  | -3.125410 | 0.571784  |
| 27 | 6  | 0 | 0.596919  | -2.013619 | 0.500418  |
| 28 | 6  | 0 | -0.396827 | -1.796261 | 1.449203  |
| 29 | 6  | 0 | -0.472271 | -2.702530 | 2.510997  |
| 30 | 6  | 0 | 0.394426  | -3.801022 | 2.607575  |
| 31 | 6  | 0 | 1.361057  | -4.030274 | 1.633309  |
| 32 | 6  | 0 | 2.341926  | -3.124548 | -0.575756 |
| 33 | 1  | 0 | -1.115995 | -0.991476 | 1.372592  |
| 34 | 1  | 0 | -1.236534 | -2.553384 | 3.267546  |
| 35 | 1  | 0 | 0.298354  | -4.488713 | 3.441967  |
| 36 | 1  | 0 | 2.021904  | -4.889480 | 1.682106  |
| 37 | 17 | 0 | 3.543595  | -4.359287 | -0.793982 |
| 38 | 7  | 0 | 2.243989  | -2.179804 | -1.454456 |
| 39 | 16 | 0 | 0.962093  | -1.133625 | -1.008167 |
| 40 | 47 | 0 | -1.116419 | 1.326377  | -0.368197 |
| 41 | 51 | 0 | -3.980767 | -0.263057 | -0.139224 |
| 42 | 9  | 0 | -2.876048 | 0.302212  | 1.310811  |
| 43 | 9  | 0 | -5.404829 | 0.677921  | 0.560380  |
| 44 | 9  | 0 | -4.885789 | -0.724123 | -1.678817 |
| 45 | 9  | 0 | -2.383733 | -1.027714 | -0.823511 |
| 46 | 9  | 0 | -4.381085 | -1.827192 | 0.757571  |
| 47 | 9  | 0 | -3.330507 | 1.346003  | -0.979538 |

-----  
Zero-point correction= 0.302772 (Hartree/Particle)  
Thermal correction to Energy= 0.337534  
Thermal correction to Enthalpy= 0.338478  
Thermal correction to Gibbs Free Energy= 0.231389  
Sum of electronic and zero-point Energies= -2923.247970  
Sum of electronic and thermal Energies= -2923.213209  
Sum of electronic and thermal Enthalpies= -2923.212265  
Sum of electronic and thermal Free Energies= -2923.319354  
M06/6-311++G(d,p)-SDD/SMD//B3LYP/6-31G(d)-LANL2DZ energy in chlorobenzene solvent = -2924.432162

#### TS1d

-----

| Center<br>Number | Atomic<br>Number | Atomic<br>Type | Coordinates (Angstroms) |           |           |
|------------------|------------------|----------------|-------------------------|-----------|-----------|
|                  |                  |                | X                       | Y         | Z         |
| 1                | 6                | 0              | 4.723477                | 1.048354  | 2.025391  |
| 2                | 6                | 0              | 3.408599                | 0.954383  | 1.574936  |
| 3                | 6                | 0              | 3.063344                | 1.394971  | 0.278468  |
| 4                | 6                | 0              | 4.080557                | 1.892314  | -0.564919 |
| 5                | 6                | 0              | 5.392189                | 1.984572  | -0.108166 |
| 6                | 6                | 0              | 5.715199                | 1.564286  | 1.186145  |
| 7                | 1                | 0              | 4.975429                | 0.720089  | 3.029754  |
| 8                | 1                | 0              | 2.632147                | 0.554434  | 2.219865  |
| 9                | 1                | 0              | 3.822690                | 2.207297  | -1.570891 |
| 10               | 1                | 0              | 6.164566                | 2.380552  | -0.761019 |
| 11               | 1                | 0              | 6.740230                | 1.636478  | 1.539071  |
| 12               | 6                | 0              | 1.686977                | 1.368961  | -0.160258 |
| 13               | 6                | 0              | 0.514481                | 1.945609  | -0.239630 |
| 14               | 7                | 0              | 0.252336                | 3.209104  | 0.273369  |
| 15               | 6                | 0              | 1.273029                | 3.986721  | 0.994856  |
| 16               | 1                | 0              | 0.870968                | 4.965797  | 1.248894  |
| 17               | 1                | 0              | 1.586835                | 3.461127  | 1.903713  |
| 18               | 1                | 0              | 2.142018                | 4.122432  | 0.345054  |
| 19               | 16               | 0              | -1.343789               | 3.851320  | 0.234512  |
| 20               | 8                | 0              | -1.214201               | 5.291121  | 0.449372  |
| 21               | 8                | 0              | -2.013845               | 3.340834  | -0.971836 |
| 22               | 6                | 0              | -2.163895               | 3.125431  | 1.668343  |
| 23               | 1                | 0              | -3.183086               | 3.520012  | 1.676823  |
| 24               | 1                | 0              | -2.178542               | 2.036629  | 1.579503  |
| 25               | 1                | 0              | -1.628971               | 3.443431  | 2.565752  |
| 26               | 6                | 0              | 2.977813                | -2.415955 | 0.054464  |
| 27               | 6                | 0              | 1.689703                | -1.853960 | 0.125550  |
| 28               | 6                | 0              | 0.755985                | -2.262805 | 1.075415  |
| 29               | 6                | 0              | 1.157123                | -3.252538 | 1.973873  |
| 30               | 6                | 0              | 2.443279                | -3.815722 | 1.922868  |
| 31               | 6                | 0              | 3.364663                | -3.408142 | 0.962442  |
| 32               | 6                | 0              | 3.696390                | -1.820509 | -1.061098 |
| 33               | 1                | 0              | -0.246889               | -1.863035 | 1.101919  |
| 34               | 1                | 0              | 0.443966                | -3.601324 | 2.714444  |
| 35               | 1                | 0              | 2.716925                | -4.589593 | 2.633596  |

|    |    |   |           |           |           |
|----|----|---|-----------|-----------|-----------|
| 36 | 1  | 0 | 4.354609  | -3.849006 | 0.904269  |
| 37 | 17 | 0 | 5.325608  | -2.282561 | -1.439249 |
| 38 | 7  | 0 | 3.102272  | -0.932047 | -1.790649 |
| 39 | 16 | 0 | 1.531656  | -0.663183 | -1.180599 |
| 40 | 47 | 0 | -1.283305 | 0.905542  | -1.106539 |
| 41 | 51 | 0 | -3.114327 | -1.535991 | 0.156123  |
| 42 | 9  | 0 | -1.526167 | -1.678384 | -0.893521 |
| 43 | 9  | 0 | -2.466773 | -2.868181 | 1.275973  |
| 44 | 9  | 0 | -4.613786 | -1.194930 | 1.176308  |
| 45 | 9  | 0 | -3.498949 | -0.068181 | -1.000647 |
| 46 | 9  | 0 | -3.983703 | -2.715327 | -0.963429 |
| 47 | 9  | 0 | -2.126123 | -0.273633 | 1.190601  |

-----  
Zero-point correction= 0.302797 (Hartree/Particle)  
Thermal correction to Energy= 0.337580  
Thermal correction to Enthalpy= 0.338524  
Thermal correction to Gibbs Free Energy= 0.231084  
Sum of electronic and zero-point Energies= -2923.250858  
Sum of electronic and thermal Energies= -2923.216075  
Sum of electronic and thermal Enthalpies= -2923.215130  
Sum of electronic and thermal Free Energies= -2923.322570  
M06/6-311++G(d,p)-SDD/SMD//B3LYP/6-31G(d)-LANL2DZ energy in chlorobenzene solvent = -2924.432635

**TS1d'**

| Center<br>Number | Atomic<br>Number | Atomic<br>Type | Coordinates (Angstroms) |           |           |
|------------------|------------------|----------------|-------------------------|-----------|-----------|
|                  |                  |                | X                       | Y         | Z         |
| 1                | 6                | 0              | 1.638278                | -2.597629 | -1.928378 |
| 2                | 6                | 0              | 1.648513                | -1.240729 | -1.609564 |
| 3                | 6                | 0              | 1.567575                | -0.822603 | -0.267633 |
| 4                | 6                | 0              | 1.503584                | -1.794272 | 0.745658  |
| 5                | 6                | 0              | 1.504014                | -3.151305 | 0.422055  |
| 6                | 6                | 0              | 1.568661                | -3.555136 | -0.912829 |
| 7                | 1                | 0              | 1.679188                | -2.907362 | -2.968893 |
| 8                | 1                | 0              | 1.694491                | -0.492737 | -2.395908 |
| 9                | 1                | 0              | 1.428399                | -1.479607 | 1.781569  |
| 10               | 1                | 0              | 1.433334                | -3.891777 | 1.213372  |
| 11               | 1                | 0              | 1.554728                | -4.612271 | -1.162584 |
| 12               | 6                | 0              | 1.528206                | 0.620209  | 0.058212  |
| 13               | 6                | 0              | 0.553786                | 1.523085  | 0.034455  |
| 14               | 7                | 0              | 0.447085                | 2.831092  | 0.389405  |
| 15               | 6                | 0              | 1.487103                | 3.602563  | 1.081582  |
| 16               | 1                | 0              | 1.085714                | 4.574381  | 1.364960  |
| 17               | 1                | 0              | 1.811030                | 3.063972  | 1.978933  |
| 18               | 1                | 0              | 2.349100                | 3.771527  | 0.426878  |
| 19               | 16               | 0              | -1.010251               | 3.704615  | -0.046348 |
| 20               | 8                | 0              | -0.632495               | 5.117038  | -0.011252 |
| 21               | 8                | 0              | -1.538357               | 3.094987  | -1.268329 |
| 22               | 6                | 0              | -2.147219               | 3.376497  | 1.311711  |
| 23               | 1                | 0              | -3.018874               | 4.010914  | 1.130708  |
| 24               | 1                | 0              | -2.448823               | 2.327296  | 1.305714  |
| 25               | 1                | 0              | -1.660389               | 3.661886  | 2.246339  |
| 26               | 6                | 0              | 5.272917                | -0.526804 | 0.093419  |
| 27               | 6                | 0              | 4.515046                | 0.482242  | -0.523399 |
| 28               | 6                | 0              | 4.705978                | 0.839126  | -1.855541 |
| 29               | 6                | 0              | 5.687026                | 0.149676  | -2.569416 |
| 30               | 6                | 0              | 6.454037                | -0.860279 | -1.964476 |
| 31               | 6                | 0              | 6.257378                | -1.207852 | -0.631141 |
| 32               | 6                | 0              | 4.843268                | -0.669493 | 1.477463  |
| 33               | 1                | 0              | 4.111901                | 1.616007  | -2.326239 |
| 34               | 1                | 0              | 5.858907                | 0.399445  | -3.612085 |
| 35               | 1                | 0              | 7.210849                | -1.376368 | -2.546867 |
| 36               | 1                | 0              | 6.847405                | -1.985728 | -0.157609 |
| 37               | 17               | 0              | 5.565020                | -1.840859 | 2.529797  |
| 38               | 7                | 0              | 3.903815                | 0.097913  | 1.927578  |
| 39               | 16               | 0              | 3.398374                | 1.159975  | 0.675192  |
| 40               | 47               | 0              | -1.248472               | 0.422805  | -0.686383 |
| 41               | 51               | 0              | -3.935700               | -1.213902 | 0.199537  |
| 42               | 9                | 0              | -2.197785               | -1.494782 | 0.893431  |
| 43               | 9                | 0              | -4.690227               | -1.433688 | 1.871271  |
| 44               | 9                | 0              | -5.535060               | -0.770438 | -0.610182 |
| 45               | 9                | 0              | -3.014278               | -0.861427 | -1.456807 |
| 46               | 9                | 0              | -4.070112               | -2.998827 | -0.256500 |
| 47               | 9                | 0              | -3.600509               | 0.627581  | 0.556780  |

-----  
Zero-point correction= 0.302332 (Hartree/Particle)  
Thermal correction to Energy= 0.337218  
Thermal correction to Enthalpy= 0.338162  
Thermal correction to Gibbs Free Energy= 0.228277

Sum of electronic and zero-point Energies= -2923.246513  
 Sum of electronic and thermal Energies= -2923.211627  
 Sum of electronic and thermal Enthalpies= -2923.210683  
 Sum of electronic and thermal Free Energies= -2923.320568  
 M06/6-311++G(d,p)-SDD/SMD//B3LYP/6-31G(d)-LANL2DZ energy chlorobenzene solvent = -2924.429210

## INT2

| Center<br>Number | Atomic<br>Number | Atomic<br>Type | Coordinates (Angstroms) |           |           |
|------------------|------------------|----------------|-------------------------|-----------|-----------|
|                  |                  |                | X                       | Y         | Z         |
| 1                | 6                | 0              | -4.419439               | -3.487681 | -0.559705 |
| 2                | 6                | 0              | -3.315354               | -2.641231 | -0.655859 |
| 3                | 6                | 0              | -3.066810               | -1.660295 | 0.323591  |
| 4                | 6                | 0              | -3.941232               | -1.588460 | 1.425251  |
| 5                | 6                | 0              | -5.025406               | -2.458753 | 1.536824  |
| 6                | 6                | 0              | -5.277642               | -3.404153 | 0.540124  |
| 7                | 1                | 0              | -4.597521               | -4.227269 | -1.335828 |
| 8                | 1                | 0              | -2.633229               | -2.730156 | -1.497571 |
| 9                | 1                | 0              | -3.752179               | -0.859934 | 2.207911  |
| 10               | 1                | 0              | -5.676142               | -2.396722 | 2.405407  |
| 11               | 1                | 0              | -6.125012               | -4.078560 | 0.626467  |
| 12               | 6                | 0              | -1.890714               | -0.774813 | 0.198311  |
| 13               | 6                | 0              | -2.029474               | 0.560635  | 0.302876  |
| 14               | 7                | 0              | -3.222191               | 1.324389  | 0.397798  |
| 15               | 6                | 0              | -3.426615               | 2.198302  | 1.562943  |
| 16               | 1                | 0              | -4.422103               | 2.640206  | 1.517592  |
| 17               | 1                | 0              | -3.343020               | 1.591361  | 2.468336  |
| 18               | 1                | 0              | -2.695249               | 3.015812  | 1.606581  |
| 19               | 16               | 0              | -3.993152               | 1.777063  | -1.068198 |
| 20               | 8                | 0              | -4.578244               | 3.105223  | -0.864078 |
| 21               | 8                | 0              | -3.038569               | 1.524877  | -2.155434 |
| 22               | 6                | 0              | -5.340759               | 0.595612  | -1.233951 |
| 23               | 1                | 0              | -5.880630               | 0.866182  | -2.144727 |
| 24               | 1                | 0              | -4.924604               | -0.409444 | -1.308365 |
| 25               | 1                | 0              | -5.991169               | 0.683794  | -0.362289 |
| 26               | 6                | 0              | 1.229819                | 2.316742  | 0.862107  |
| 27               | 6                | 0              | 1.119937                | 2.764127  | -0.474615 |
| 28               | 6                | 0              | 2.128504                | 3.541169  | -1.057921 |
| 29               | 6                | 0              | 3.242048                | 3.837696  | -0.285649 |
| 30               | 6                | 0              | 3.365419                | 3.384874  | 1.046437  |
| 31               | 6                | 0              | 2.369178                | 2.629021  | 1.630457  |
| 32               | 6                | 0              | 0.091810                | 1.545664  | 1.217919  |
| 33               | 1                | 0              | 2.053524                | 3.880183  | -2.085805 |
| 34               | 1                | 0              | 4.046500                | 4.421828  | -0.722417 |
| 35               | 1                | 0              | 4.263434                | 3.620021  | 1.607660  |
| 36               | 1                | 0              | 2.459879                | 2.254326  | 2.643721  |
| 37               | 17               | 0              | -0.152316               | 0.881987  | 2.771846  |
| 38               | 7                | 0              | -0.806546               | 1.388368  | 0.247898  |
| 39               | 16               | 0              | -0.347011               | 2.211284  | -1.220004 |
| 40               | 47               | 0              | 0.024250                | -1.634622 | -0.158835 |
| 41               | 51               | 0              | 3.310804                | -1.045467 | -0.263111 |
| 42               | 9                | 0              | 2.079410                | -2.513195 | -0.502659 |
| 43               | 9                | 0              | 4.371283                | -2.118332 | 0.802353  |
| 44               | 9                | 0              | 4.343300                | 0.470760  | 0.003492  |
| 45               | 9                | 0              | 2.056823                | -0.048614 | -1.267565 |
| 46               | 9                | 0              | 2.239556                | -0.602898 | 1.233317  |
| 47               | 9                | 0              | 4.189049                | -1.533691 | -1.812442 |

Zero-point correction= 0.305176 (Hartree/Particle)  
 Thermal correction to Energy= 0.339819  
 Thermal correction to Enthalpy= 0.340763  
 Thermal correction to Gibbs Free Energy= 0.234596  
 Sum of electronic and zero-point Energies= -2923.281084  
 Sum of electronic and thermal Energies= -2923.246441  
 Sum of electronic and thermal Enthalpies= -2923.245497  
 Sum of electronic and thermal Free Energies= -2923.351665  
 M06/6-311++G(d,p)-SDD/SMD//B3LYP/6-31G(d)-LANL2DZ energy in chlorobenzene solvent = -2924.476866

## TS2

| Center<br>Number | Atomic<br>Number | Atomic<br>Type | Coordinates (Angstroms) |           |          |
|------------------|------------------|----------------|-------------------------|-----------|----------|
|                  |                  |                | X                       | Y         | Z        |
| 1                | 6                | 0              | 1.058447                | -4.123908 | 1.431487 |
| 2                | 6                | 0              | 0.699687                | -2.938995 | 0.799417 |
| 3                | 6                | 0              | -0.607438               | -2.403583 | 0.956029 |
| 4                | 6                | 0              | -1.522013               | -3.093992 | 1.802170 |
| 5                | 6                | 0              | -1.147952               | -4.265099 | 2.442956 |
| 6                | 6                | 0              | 0.141687                | -4.786057 | 2.253648 |



|    |    |   |           |           |           |
|----|----|---|-----------|-----------|-----------|
| 7  | 1  | 0 | 2.059308  | -4.522404 | 1.297164  |
| 8  | 1  | 0 | 1.420582  | -2.411657 | 0.182009  |
| 9  | 1  | 0 | -2.513615 | -2.680659 | 1.955183  |
| 10 | 1  | 0 | -1.847911 | -4.774463 | 3.099398  |
| 11 | 1  | 0 | 0.431560  | -5.702927 | 2.759744  |
| 12 | 6  | 0 | -0.937820 | -1.156874 | 0.329337  |
| 13 | 6  | 0 | -2.222728 | -0.675011 | 0.108574  |
| 14 | 7  | 0 | -3.295174 | -1.455619 | -0.379087 |
| 15 | 6  | 0 | -4.655339 | -0.885538 | -0.331553 |
| 16 | 1  | 0 | -5.369749 | -1.645794 | -0.650054 |
| 17 | 1  | 0 | -4.876762 | -0.613640 | 0.701630  |
| 18 | 1  | 0 | -4.768948 | -0.013617 | -0.983692 |
| 19 | 16 | 0 | -2.988417 | -2.376709 | -1.859381 |
| 20 | 8  | 0 | -4.009706 | -1.992873 | -2.834590 |
| 21 | 8  | 0 | -1.562628 | -2.272514 | -2.156549 |
| 22 | 6  | 0 | -3.342692 | -4.051217 | -1.300360 |
| 23 | 1  | 0 | -3.202029 | -4.703893 | -2.165434 |
| 24 | 1  | 0 | -2.645502 | -4.306464 | -0.501379 |
| 25 | 1  | 0 | -4.377031 | -4.100801 | -0.954904 |
| 26 | 6  | 0 | -2.685349 | 2.975824  | 0.649111  |
| 27 | 6  | 0 | -1.911930 | 3.301298  | -0.502721 |
| 28 | 6  | 0 | -1.672906 | 4.660440  | -0.788437 |
| 29 | 6  | 0 | -2.216105 | 5.648601  | 0.018706  |
| 30 | 6  | 0 | -2.995262 | 5.322687  | 1.144709  |
| 31 | 6  | 0 | -3.222025 | 3.996715  | 1.462600  |
| 32 | 6  | 0 | -2.811418 | 1.568224  | 0.925692  |
| 33 | 1  | 0 | -1.065001 | 4.922479  | -1.648162 |
| 34 | 1  | 0 | -2.030116 | 6.691610  | -0.221932 |
| 35 | 1  | 0 | -3.407937 | 6.109240  | 1.768109  |
| 36 | 1  | 0 | -3.811152 | 3.734270  | 2.334238  |
| 37 | 17 | 0 | -3.501318 | 1.056956  | 2.462954  |
| 38 | 7  | 0 | -2.367310 | 0.692341  | 0.093444  |
| 39 | 16 | 0 | -1.287227 | 2.033404  | -1.512869 |
| 40 | 47 | 0 | 0.597860  | 0.272780  | -0.241844 |
| 41 | 51 | 0 | 3.868452  | 0.320917  | -0.091330 |
| 42 | 9  | 0 | 4.894943  | 0.494785  | -1.616207 |
| 43 | 9  | 0 | 5.002539  | -0.896971 | 0.712015  |
| 44 | 9  | 0 | 4.639011  | 1.788120  | 0.725235  |
| 45 | 9  | 0 | 2.628531  | 0.164212  | 1.340924  |
| 46 | 9  | 0 | 2.518180  | 1.457566  | -0.861417 |
| 47 | 9  | 0 | 2.880074  | -1.089832 | -0.894020 |

-----  
Zero-point correction= 0.303639 (Hartree/Particle)  
Thermal correction to Energy= 0.338114  
Thermal correction to Enthalpy= 0.339058  
Thermal correction to Gibbs Free Energy= 0.232058  
Sum of electronic and zero-point Energies= -2923.244460  
Sum of electronic and thermal Energies= -2923.209985  
Sum of electronic and thermal Enthalpies= -2923.209041  
Sum of electronic and thermal Free Energies= -2923.316040  
M06/6-311++G(d,p)-SDD/SMD/B3LYP/6-31G(d)-LANL2DZ energy in chlorobenzene solvent = -2924.425329

### INT3

| Center<br>Number | Atomic<br>Number | Atomic<br>Type | Coordinates (Angstroms) |           |           |
|------------------|------------------|----------------|-------------------------|-----------|-----------|
|                  |                  |                | X                       | Y         | Z         |
| 1                | 6                | 0              | 1.651616                | -3.047378 | 2.002472  |
| 2                | 6                | 0              | 1.092176                | -2.287157 | 0.984356  |
| 3                | 6                | 0              | -0.284833               | -1.925111 | 1.022698  |
| 4                | 6                | 0              | -1.071007               | -2.355175 | 2.137852  |
| 5                | 6                | 0              | -0.502178               | -3.111549 | 3.146765  |
| 6                | 6                | 0              | 0.860277                | -3.457488 | 3.078734  |
| 7                | 1                | 0              | 2.708441                | -3.288766 | 1.962674  |
| 8                | 1                | 0              | 1.697953                | -1.960422 | 0.150429  |
| 9                | 1                | 0              | -2.111570               | -2.049308 | 2.199252  |
| 10               | 1                | 0              | -1.098322               | -3.423181 | 3.999487  |
| 11               | 1                | 0              | 1.302899                | -4.040437 | 3.882050  |
| 12               | 6                | 0              | -0.825806               | -1.128678 | -0.018658 |
| 13               | 6                | 0              | -2.177243               | -0.857662 | -0.273199 |
| 14               | 7                | 0              | -3.115869               | -1.745534 | -0.785953 |
| 15               | 6                | 0              | -4.431310               | -1.207744 | -1.193160 |
| 16               | 1                | 0              | -4.991181               | -2.001132 | -1.684726 |
| 17               | 1                | 0              | -4.973040               | -0.868541 | -0.307854 |
| 18               | 1                | 0              | -4.305527               | -0.377766 | -1.894949 |
| 19               | 16               | 0              | -2.600411               | -3.240481 | -1.551003 |
| 20               | 8                | 0              | -3.511847               | -3.462674 | -2.668523 |
| 21               | 8                | 0              | -1.155705               | -3.159994 | -1.730883 |
| 22               | 6                | 0              | -2.967321               | -4.455525 | -0.274872 |
| 23               | 1                | 0              | -2.699497               | -5.430022 | -0.691324 |

|    |    |   |           |           |           |
|----|----|---|-----------|-----------|-----------|
| 24 | 1  | 0 | -2.364745 | -4.237249 | 0.608170  |
| 25 | 1  | 0 | -4.034905 | -4.418869 | -0.050470 |
| 26 | 6  | 0 | -2.972344 | 2.677754  | 0.514513  |
| 27 | 6  | 0 | -2.022046 | 3.257344  | -0.399011 |
| 28 | 6  | 0 | -1.878701 | 4.666334  | -0.369205 |
| 29 | 6  | 0 | -2.666555 | 5.464485  | 0.441413  |
| 30 | 6  | 0 | -3.621790 | 4.890767  | 1.299287  |
| 31 | 6  | 0 | -3.757303 | 3.517965  | 1.340975  |
| 32 | 6  | 0 | -3.050420 | 1.240272  | 0.627106  |
| 33 | 1  | 0 | -1.137821 | 5.113400  | -1.023397 |
| 34 | 1  | 0 | -2.538042 | 6.543220  | 0.416584  |
| 35 | 1  | 0 | -4.236012 | 5.518068  | 1.937613  |
| 36 | 1  | 0 | -4.475670 | 3.069058  | 2.016519  |
| 37 | 17 | 0 | -3.889094 | 0.549709  | 2.078277  |
| 38 | 7  | 0 | -2.516381 | 0.445036  | -0.203754 |
| 39 | 16 | 0 | -1.090387 | 2.397992  | -1.603225 |
| 40 | 47 | 0 | 0.474083  | 0.699292  | -0.607140 |
| 41 | 51 | 0 | 3.720280  | 0.331050  | -0.093536 |
| 42 | 9  | 0 | 5.052812  | 0.282729  | -1.368096 |
| 43 | 9  | 0 | 4.206630  | -1.294622 | 0.670542  |
| 44 | 9  | 0 | 4.716615  | 1.333603  | 1.093070  |
| 45 | 9  | 0 | 2.232071  | 0.369221  | 1.112368  |
| 46 | 9  | 0 | 2.902145  | 1.851127  | -0.854066 |
| 47 | 9  | 0 | 2.547852  | -0.649554 | -1.249642 |

-----  
Zero-point correction= 0.303781 (Hartree/Particle)  
Thermal correction to Energy= 0.339171  
Thermal correction to Enthalpy= 0.340115  
Thermal correction to Gibbs Free Energy= 0.231651  
Sum of electronic and zero-point Energies= -2923.250393  
Sum of electronic and thermal Energies= -2923.215003  
Sum of electronic and thermal Enthalpies= -2923.214059  
Sum of electronic and thermal Free Energies= -2923.322523  
M06/6-311++G(d,p)-SDD/SMD//B3LYP/6-31G(d)-LANL2DZ energy in chlorobenzene solvent = -2924.434022

### TS3

-----

| Center<br>Number | Atomic<br>Number | Atomic<br>Type | Coordinates (Angstroms) |           |           |
|------------------|------------------|----------------|-------------------------|-----------|-----------|
|                  |                  |                | X                       | Y         | Z         |
| 1                | 6                | 0              | 0.030178                | -2.060242 | 3.246776  |
| 2                | 6                | 0              | 0.005018                | -1.259501 | 2.115416  |
| 3                | 6                | 0              | 1.069987                | -0.346113 | 1.834270  |
| 4                | 6                | 0              | 2.139841                | -0.268160 | 2.786056  |
| 5                | 6                | 0              | 2.126699                | -1.037968 | 3.936525  |
| 6                | 6                | 0              | 1.083279                | -1.947956 | 4.162234  |
| 7                | 1                | 0              | -0.783749               | -2.754477 | 3.430524  |
| 8                | 1                | 0              | -0.839067               | -1.319949 | 1.439061  |
| 9                | 1                | 0              | 2.959606                | 0.420419  | 2.619667  |
| 10               | 1                | 0              | 2.933885                | -0.947216 | 4.657300  |
| 11               | 1                | 0              | 1.089256                | -2.562574 | 5.058403  |
| 12               | 6                | 0              | 0.945826                | 0.521323  | 0.711250  |
| 13               | 6                | 0              | 2.092693                | 1.323921  | 0.273799  |
| 14               | 7                | 0              | 1.940611                | 2.666967  | 0.090189  |
| 15               | 6                | 0              | 3.101264                | 3.453100  | -0.368849 |
| 16               | 1                | 0              | 2.860683                | 4.509903  | -0.282731 |
| 17               | 1                | 0              | 3.954495                | 3.202201  | 0.264814  |
| 18               | 1                | 0              | 3.337450                | 3.200367  | -1.407774 |
| 19               | 16               | 0              | 0.348823                | 3.452469  | -0.140199 |
| 20               | 8                | 0              | 0.694261                | 4.868730  | -0.206384 |
| 21               | 8                | 0              | -0.326006               | 2.804058  | -1.262524 |
| 22               | 6                | 0              | -0.555930               | 3.170838  | 1.392438  |
| 23               | 1                | 0              | -1.334686               | 3.939363  | 1.382454  |
| 24               | 1                | 0              | -0.999855               | 2.175419  | 1.394409  |
| 25               | 1                | 0              | 0.120418                | 3.334608  | 2.233083  |
| 26               | 6                | 0              | 3.685941                | -1.312014 | -0.844439 |
| 27               | 6                | 0              | 2.641993                | -1.248604 | -1.831529 |
| 28               | 6                | 0              | 2.421580                | -2.387851 | -2.640204 |
| 29               | 6                | 0              | 3.173415                | -3.541371 | -2.505249 |
| 30               | 6                | 0              | 4.192916                | -3.606321 | -1.541536 |
| 31               | 6                | 0              | 4.441414                | -2.512309 | -0.738155 |
| 32               | 6                | 0              | 3.978610                | -0.210430 | 0.053846  |
| 33               | 1                | 0              | 1.632248                | -2.333642 | -3.382707 |
| 34               | 1                | 0              | 2.969072                | -4.395437 | -3.144907 |
| 35               | 1                | 0              | 4.785079                | -4.508454 | -1.424045 |
| 36               | 1                | 0              | 5.222487                | -2.575239 | 0.007719  |
| 37               | 17               | 0              | 5.511728                | -0.306367 | 0.981160  |
| 38               | 7                | 0              | 3.354871                | 0.882381  | 0.291026  |
| 39               | 16               | 0              | 1.670003                | 0.164166  | -2.166687 |
| 40               | 47               | 0              | -0.605566               | 0.064472  | -0.890447 |

|    |    |   |           |           |           |
|----|----|---|-----------|-----------|-----------|
| 41 | 51 | 0 | -3.720079 | -0.595207 | -0.011083 |
| 42 | 9  | 0 | -2.907311 | 0.201565  | -1.547174 |
| 43 | 9  | 0 | -2.246411 | -1.810238 | -0.108045 |
| 44 | 9  | 0 | -4.275295 | -1.406298 | 1.555268  |
| 45 | 9  | 0 | -4.999542 | 0.733916  | 0.044537  |
| 46 | 9  | 0 | -4.726913 | -1.701339 | -1.092348 |
| 47 | 9  | 0 | -2.531754 | 0.501550  | 0.995353  |

-----  
Zero-point correction= 0.303392 (Hartree/Particle)  
Thermal correction to Energy= 0.337886  
Thermal correction to Enthalpy= 0.338830  
Thermal correction to Gibbs Free Energy= 0.233450  
Sum of electronic and zero-point Energies= -2923.247935  
Sum of electronic and thermal Energies= -2923.213441  
Sum of electronic and thermal Enthalpies= -2923.212497  
Sum of electronic and thermal Free Energies= -2923.317877  
M06/6-311++G(d,p)-SDD/SMD//B3LYP/6-31G(d)-LANL2DZ energy in chlorobenzene solvent = -2924.430800

#### INT4

| Center<br>Number | Atomic<br>Number | Atomic<br>Type | Coordinates (Angstroms) |           |           |
|------------------|------------------|----------------|-------------------------|-----------|-----------|
|                  |                  |                | X                       | Y         | Z         |
| 1                | 6                | 0              | 2.109790                | -3.810286 | 0.068239  |
| 2                | 6                | 0              | 1.992319                | -2.512949 | -0.435407 |
| 3                | 6                | 0              | 1.515258                | -1.466162 | 0.369808  |
| 4                | 6                | 0              | 1.172247                | -1.767938 | 1.703294  |
| 5                | 6                | 0              | 1.299565                | -3.059629 | 2.205466  |
| 6                | 6                | 0              | 1.768668                | -4.093228 | 1.389729  |
| 7                | 1                | 0              | 2.475390                | -4.600425 | -0.582248 |
| 8                | 1                | 0              | 2.258562                | -2.322253 | -1.470313 |
| 9                | 1                | 0              | 0.785498                | -0.984646 | 2.351014  |
| 10               | 1                | 0              | 1.020887                | -3.260255 | 3.236316  |
| 11               | 1                | 0              | 1.861780                | -5.102536 | 1.779647  |
| 12               | 6                | 0              | 1.266413                | -0.071075 | -0.163107 |
| 13               | 6                | 0              | 1.808054                | 1.028143  | 0.711470  |
| 14               | 7                | 0              | 1.291435                | 2.259311  | 0.952497  |
| 15               | 6                | 0              | 2.124839                | 3.216612  | 1.714168  |
| 16               | 1                | 0              | 1.538849                | 4.107962  | 1.921895  |
| 17               | 1                | 0              | 2.446616                | 2.741487  | 2.643697  |
| 18               | 1                | 0              | 3.003899                | 3.500119  | 1.128489  |
| 19               | 16               | 0              | -0.237072               | 2.938525  | 0.279275  |
| 20               | 8                | 0              | -0.067591               | 4.377192  | 0.443233  |
| 21               | 8                | 0              | -0.432222               | 2.360528  | -1.043514 |
| 22               | 6                | 0              | -1.462653               | 2.373448  | 1.465065  |
| 23               | 1                | 0              | -2.422632               | 2.739617  | 1.094144  |
| 24               | 1                | 0              | -1.500536               | 1.284639  | 1.508707  |
| 25               | 1                | 0              | -1.207780               | 2.821614  | 2.427052  |
| 26               | 6                | 0              | 4.616917                | -0.014503 | -0.274683 |
| 27               | 6                | 0              | 3.871044                | 0.168804  | -1.477757 |
| 28               | 6                | 0              | 4.555225                | 0.139451  | -2.708467 |
| 29               | 6                | 0              | 5.921526                | -0.079706 | -2.773929 |
| 30               | 6                | 0              | 6.653986                | -0.303017 | -1.598649 |
| 31               | 6                | 0              | 6.008947                | -0.273827 | -0.377781 |
| 32               | 6                | 0              | 4.015091                | 0.146546  | 1.044719  |
| 33               | 1                | 0              | 3.985383                | 0.272600  | -3.624488 |
| 34               | 1                | 0              | 6.417848                | -0.093830 | -3.740025 |
| 35               | 1                | 0              | 7.721693                | -0.492492 | -1.642550 |
| 36               | 1                | 0              | 6.578296                | -0.434964 | 0.528500  |
| 37               | 17               | 0              | 4.913762                | -0.476867 | 2.432599  |
| 38               | 7                | 0              | 2.941854                | 0.766463  | 1.365084  |
| 39               | 16               | 0              | 2.111165                | 0.401899  | -1.685864 |
| 40               | 47               | 0              | -0.879879               | -0.312246 | -0.751262 |
| 41               | 51               | 0              | -4.134103               | -0.420382 | -0.065121 |
| 42               | 9                | 0              | -2.920980               | -1.146896 | -1.375090 |
| 43               | 9                | 0              | -2.649300               | -0.583709 | 1.131467  |
| 44               | 9                | 0              | -5.126317               | 0.387173  | 1.268881  |
| 45               | 9                | 0              | -5.431765               | -0.228621 | -1.362036 |
| 46               | 9                | 0              | -4.663827               | -2.131829 | 0.378635  |
| 47               | 9                | 0              | -3.357541               | 1.236330  | -0.527632 |

-----  
Zero-point correction= 0.305138 (Hartree/Particle)  
Thermal correction to Energy= 0.339642  
Thermal correction to Enthalpy= 0.340586  
Thermal correction to Gibbs Free Energy= 0.234106  
Sum of electronic and zero-point Energies= -2923.289108  
Sum of electronic and thermal Energies= -2923.254604  
Sum of electronic and thermal Enthalpies= -2923.253660  
Sum of electronic and thermal Free Energies= -2923.360140  
M06/6-311++G(d,p)-SDD/SMD//B3LYP/6-31G(d)-LANL2DZ energy in chlorobenzene solvent = -2924.482597

TS4

| Center Number | Atomic Number | Atomic Type | Coordinates (Angstroms) |           |           |
|---------------|---------------|-------------|-------------------------|-----------|-----------|
|               |               |             | X                       | Y         | Z         |
| 1             | 6             | 0           | 3.030773                | 4.668201  | -0.306458 |
| 2             | 6             | 0           | 2.140785                | 4.101180  | 0.569297  |
| 3             | 6             | 0           | 1.768492                | 2.728422  | 0.452227  |
| 4             | 6             | 0           | 2.238604                | 1.991440  | -0.701315 |
| 5             | 6             | 0           | 3.208346                | 2.601170  | -1.570638 |
| 6             | 6             | 0           | 3.593332                | 3.897364  | -1.364288 |
| 7             | 1             | 0           | 3.328275                | 5.704488  | -0.180997 |
| 8             | 1             | 0           | 1.744846                | 4.670584  | 1.402028  |
| 9             | 1             | 0           | 3.585847                | 2.027796  | -2.410177 |
| 10            | 1             | 0           | 4.314323                | 4.354626  | -2.035884 |
| 11            | 6             | 0           | 1.118975                | 2.016513  | 1.484493  |
| 12            | 6             | 0           | 2.060820                | -0.077977 | 1.033492  |
| 13            | 6             | 0           | 2.476212                | 0.123331  | -0.323511 |
| 14            | 7             | 0           | 1.278618                | 0.732053  | 1.739282  |
| 15            | 16            | 0           | 1.199320                | 0.696618  | -1.462744 |
| 16            | 17            | 0           | 0.182553                | 2.899808  | 2.682454  |
| 17            | 6             | 0           | 3.678231                | -0.540626 | -0.894335 |
| 18            | 6             | 0           | 4.907764                | -0.430278 | -0.220036 |
| 19            | 6             | 0           | 3.628946                | -1.258293 | -2.099495 |
| 20            | 6             | 0           | 6.052755                | -1.035578 | -0.731110 |
| 21            | 1             | 0           | 4.959744                | 0.137729  | 0.704278  |
| 22            | 6             | 0           | 4.777385                | -1.869072 | -2.607504 |
| 23            | 1             | 0           | 2.688545                | -1.346621 | -2.634539 |
| 24            | 6             | 0           | 5.991044                | -1.758948 | -1.926320 |
| 25            | 1             | 0           | 6.996135                | -0.936657 | -0.201602 |
| 26            | 1             | 0           | 4.721465                | -2.426517 | -3.538142 |
| 27            | 1             | 0           | 6.885735                | -2.227257 | -2.326658 |
| 28            | 7             | 0           | 2.465013                | -1.278424 | 1.674086  |
| 29            | 6             | 0           | 2.697292                | -1.216863 | 3.133655  |
| 30            | 1             | 0           | 1.784046                | -1.001957 | 3.692648  |
| 31            | 1             | 0           | 3.116434                | -2.167442 | 3.469139  |
| 32            | 1             | 0           | 3.430212                | -0.427069 | 3.312450  |
| 33            | 16            | 0           | 1.532815                | -2.664279 | 1.176426  |
| 34            | 8             | 0           | 0.715981                | -2.226113 | 0.026630  |
| 35            | 8             | 0           | 0.907956                | -3.260493 | 2.354491  |
| 36            | 6             | 0           | 2.782676                | -3.802622 | 0.561693  |
| 37            | 1             | 0           | 3.295419                | -3.345922 | -0.285039 |
| 38            | 1             | 0           | 3.477365                | -4.023099 | 1.374409  |
| 39            | 1             | 0           | 2.253219                | -4.709684 | 0.260109  |
| 40            | 47            | 0           | -0.984008               | -0.219471 | -0.247067 |
| 41            | 51            | 0           | -4.184672               | -0.140294 | -0.382894 |
| 42            | 9             | 0           | -2.973593               | 1.182314  | -1.025121 |
| 43            | 9             | 0           | -5.160273               | -0.048127 | -1.948432 |
| 44            | 9             | 0           | -2.963397               | -1.374081 | -1.182194 |
| 45            | 9             | 0           | -5.171090               | -1.539680 | 0.308049  |
| 46            | 9             | 0           | -2.978131               | -0.233152 | 1.105365  |
| 47            | 9             | 0           | -5.180628               | 1.153418  | 0.479606  |

Zero-point correction= 0.303975 (Hartree/Particle)  
 Thermal correction to Energy= 0.338153  
 Thermal correction to Enthalpy= 0.339098  
 Thermal correction to Gibbs Free Energy= 0.231424  
 Sum of electronic and zero-point Energies= -2923.287455  
 Sum of electronic and thermal Energies= -2923.253277  
 Sum of electronic and thermal Enthalpies= -2923.252333  
 Sum of electronic and thermal Free Energies= -2923.360007  
 M06/6-311++G(d,p)-SDD/SMD/B3LYP/6-31G(d)-LANL2DZ energy chlorobenzene solvent = -2924.479830

INT5

| Center Number | Atomic Number | Atomic Type | Coordinates (Angstroms) |          |           |
|---------------|---------------|-------------|-------------------------|----------|-----------|
|               |               |             | X                       | Y        | Z         |
| 1             | 6             | 0           | 0.315128                | 4.515040 | -0.219907 |
| 2             | 6             | 0           | -0.153130               | 3.566080 | 0.664203  |
| 3             | 6             | 0           | 0.430830                | 2.276472 | 0.689623  |
| 4             | 6             | 0           | 1.463892                | 1.928714 | -0.213543 |
| 5             | 6             | 0           | 1.945684                | 2.925371 | -1.076113 |
| 6             | 6             | 0           | 1.381871                | 4.192487 | -1.079679 |
| 7             | 1             | 0           | -0.133304               | 5.502844 | -0.250445 |
| 8             | 1             | 0           | -0.972035               | 3.788960 | 1.337350  |
| 9             | 1             | 0           | 2.749320                | 2.689707 | -1.763261 |
| 10            | 1             | 0           | 1.764618                | 4.941595 | -1.767051 |
| 11            | 6             | 0           | 0.074696                | 1.269820 | 1.641145  |

|    |    |   |           |           |           |
|----|----|---|-----------|-----------|-----------|
| 12 | 6  | 0 | 1.408873  | -0.404110 | 0.744608  |
| 13 | 6  | 0 | 2.054230  | 0.520562  | -0.277979 |
| 14 | 7  | 0 | 0.514046  | 0.041610  | 1.648514  |
| 15 | 16 | 0 | 1.478216  | -0.136164 | -1.955639 |
| 16 | 17 | 0 | -0.967214 | 1.671617  | 2.966381  |
| 17 | 6  | 0 | 3.580920  | 0.637564  | -0.106229 |
| 18 | 6  | 0 | 4.086562  | 0.855346  | 1.184482  |
| 19 | 6  | 0 | 4.463783  | 0.642526  | -1.189486 |
| 20 | 6  | 0 | 5.453300  | 1.059009  | 1.389340  |
| 21 | 1  | 0 | 3.411040  | 0.886603  | 2.037467  |
| 22 | 6  | 0 | 5.827210  | 0.857283  | -0.985205 |
| 23 | 1  | 0 | 4.083110  | 0.449462  | -2.186504 |
| 24 | 6  | 0 | 6.328417  | 1.062512  | 0.301821  |
| 25 | 1  | 0 | 5.827475  | 1.228370  | 2.395489  |
| 26 | 1  | 0 | 6.501124  | 0.852845  | -1.837368 |
| 27 | 1  | 0 | 7.391310  | 1.225799  | 0.456160  |
| 28 | 7  | 0 | 1.624148  | -1.736367 | 0.865860  |
| 29 | 6  | 0 | 0.697805  | -2.500324 | 1.753723  |
| 30 | 1  | 0 | -0.329217 | -2.278530 | 1.461980  |
| 31 | 1  | 0 | 0.891400  | -3.560831 | 1.614376  |
| 32 | 1  | 0 | 0.848926  | -2.205522 | 2.794403  |
| 33 | 16 | 0 | 2.914688  | -2.786466 | 0.151621  |
| 34 | 8  | 0 | 3.632148  | -2.106266 | -0.906516 |
| 35 | 8  | 0 | 2.260260  | -4.068480 | -0.070073 |
| 36 | 6  | 0 | 3.986836  | -2.898125 | 1.596884  |
| 37 | 1  | 0 | 4.398021  | -1.906594 | 1.794386  |
| 38 | 1  | 0 | 3.420284  | -3.280948 | 2.447282  |
| 39 | 1  | 0 | 4.782103  | -3.597533 | 1.325865  |
| 40 | 47 | 0 | -0.937392 | -0.262302 | -1.722960 |
| 41 | 51 | 0 | -3.635563 | -0.344860 | 0.132938  |
| 42 | 9  | 0 | -2.328792 | 1.039621  | 0.105352  |
| 43 | 9  | 0 | -4.961313 | 0.893680  | -0.206573 |
| 44 | 9  | 0 | -3.250841 | -0.464405 | -1.748044 |
| 45 | 9  | 0 | -4.781807 | -1.784906 | 0.013396  |
| 46 | 9  | 0 | -2.149728 | -1.516673 | 0.318954  |
| 47 | 9  | 0 | -3.771395 | -0.195282 | 1.970353  |

-----  
Zero-point correction= 0.307028 (Hartree/Particle)  
Thermal correction to Energy= 0.341200  
Thermal correction to Enthalpy= 0.342144  
Thermal correction to Gibbs Free Energy= 0.237719  
Sum of electronic and zero-point Energies= -2923.319383  
Sum of electronic and thermal Energies= -2923.285211  
Sum of electronic and thermal Enthalpies= -2923.284267  
Sum of electronic and thermal Free Energies= -2923.388692  
M06/6-311++G(d,p)-SDD/SMD//B3LYP/6-31G(d)-LANL2DZ energy in chlorobenzene solvent = -2924.517281

### TSS

| Center Number | Atomic Number | Atomic Type | Coordinates (Angstroms) |           |           |
|---------------|---------------|-------------|-------------------------|-----------|-----------|
|               |               |             | X                       | Y         | Z         |
| 1             | 6             | 0           | 3.189577                | 4.671989  | -0.477080 |
| 2             | 6             | 0           | 2.045594                | 4.159213  | 0.106344  |
| 3             | 6             | 0           | 1.940257                | 2.777894  | 0.369165  |
| 4             | 6             | 0           | 3.012308                | 1.895624  | 0.027454  |
| 5             | 6             | 0           | 4.180149                | 2.459631  | -0.542755 |
| 6             | 6             | 0           | 4.261545                | 3.816948  | -0.794356 |
| 7             | 1             | 0           | 3.263430                | 5.735726  | -0.681382 |
| 8             | 1             | 0           | 1.220465                | 4.811268  | 0.367101  |
| 9             | 1             | 0           | 5.016750                | 1.816366  | -0.785239 |
| 10            | 1             | 0           | 5.164556                | 4.225865  | -1.238154 |
| 11            | 6             | 0           | 0.814739                | 2.177376  | 1.026612  |
| 12            | 6             | 0           | 1.685401                | 0.052689  | 0.913773  |
| 13            | 6             | 0           | 2.887249                | 0.484115  | 0.291285  |
| 14            | 7             | 0           | 0.705289                | 0.910364  | 1.284689  |
| 15            | 16            | 0           | 1.088709                | 0.192779  | -2.027139 |
| 16            | 17            | 0           | -0.507011               | 3.179812  | 1.563151  |
| 17            | 6             | 0           | 4.088944                | -0.390826 | 0.179258  |
| 18            | 6             | 0           | 4.702787                | -0.851707 | 1.355855  |
| 19            | 6             | 0           | 4.673601                | -0.701030 | -1.058867 |
| 20            | 6             | 0           | 5.878865                | -1.603190 | 1.294389  |
| 21            | 1             | 0           | 4.266423                | -0.608239 | 2.320320  |
| 22            | 6             | 0           | 5.842875                | -1.457188 | -1.117064 |
| 23            | 1             | 0           | 4.184858                | -0.375767 | -1.971915 |
| 24            | 6             | 0           | 6.450688                | -1.908982 | 0.057870  |
| 25            | 1             | 0           | 6.349019                | -1.941496 | 2.213732  |
| 26            | 1             | 0           | 6.275348                | -1.701108 | -2.083194 |
| 27            | 1             | 0           | 7.363512                | -2.496004 | 0.009040  |
| 28            | 7             | 0           | 1.475211                | -1.274910 | 1.351029  |

|    |    |   |           |           |           |
|----|----|---|-----------|-----------|-----------|
| 29 | 6  | 0 | 0.450532  | -1.464201 | 2.414851  |
| 30 | 1  | 0 | 0.679192  | -0.766780 | 3.220708  |
| 31 | 1  | 0 | -0.564129 | -1.291755 | 2.052166  |
| 32 | 1  | 0 | 0.539989  | -2.484320 | 2.794081  |
| 33 | 16 | 0 | 1.435102  | -2.571465 | 0.181171  |
| 34 | 8  | 0 | 2.056329  | -2.067147 | -1.053239 |
| 35 | 8  | 0 | 0.087056  | -3.134731 | 0.153867  |
| 36 | 6  | 0 | 2.548192  | -3.782331 | 0.908940  |
| 37 | 1  | 0 | 3.545020  | -3.345765 | 0.975437  |
| 38 | 1  | 0 | 2.165994  | -4.063120 | 1.892044  |
| 39 | 1  | 0 | 2.536321  | -4.646154 | 0.239961  |
| 40 | 47 | 0 | -1.119085 | -0.321662 | -1.275670 |
| 41 | 51 | 0 | -4.011616 | -0.102114 | 0.144898  |
| 42 | 9  | 0 | -3.462343 | -0.644538 | -1.611530 |
| 43 | 9  | 0 | -4.964509 | -1.670959 | 0.341789  |
| 44 | 9  | 0 | -2.407008 | -1.019607 | 0.670126  |
| 45 | 9  | 0 | -4.297345 | 0.434241  | 1.888974  |
| 46 | 9  | 0 | -2.854892 | 1.363011  | -0.164825 |
| 47 | 9  | 0 | -5.448297 | 0.827860  | -0.545105 |

-----  
Zero-point correction= 0.305949 (Hartree/Particle)  
Thermal correction to Energy= 0.339940  
Thermal correction to Enthalpy= 0.340884  
Thermal correction to Gibbs Free Energy= 0.235593  
Sum of electronic and zero-point Energies= -2923.270405  
Sum of electronic and thermal Energies= -2923.236414  
Sum of electronic and thermal Enthalpies= -2923.235469  
Sum of electronic and thermal Free Energies= -2923.340761  
M06/6-311++G(d,p)-SDD/SMD//B3LYP/6-31G(d)-LANL2DZ energy in chlorobenzene solvent = -2924.464803

#### INT6

| Center<br>Number | Atomic<br>Number | Atomic<br>Type | Coordinates (Angstroms) |           |           |
|------------------|------------------|----------------|-------------------------|-----------|-----------|
|                  |                  |                | X                       | Y         | Z         |
| 1                | 6                | 0              | 0.908154                | -3.667726 | 3.454091  |
| 2                | 6                | 0              | 0.422349                | -2.379534 | 3.460178  |
| 3                | 6                | 0              | 0.793563                | -1.473913 | 2.435423  |
| 4                | 6                | 0              | 1.669567                | -1.901731 | 1.385786  |
| 5                | 6                | 0              | 2.157718                | -3.234442 | 1.419282  |
| 6                | 6                | 0              | 1.783392                | -4.093954 | 2.428933  |
| 7                | 1                | 0              | 0.616447                | -4.360524 | 4.237540  |
| 8                | 1                | 0              | -0.252367               | -2.046914 | 4.240001  |
| 9                | 1                | 0              | 2.824624                | -3.570288 | 0.633849  |
| 10               | 1                | 0              | 2.161076                | -5.112390 | 2.435569  |
| 11               | 6                | 0              | 0.343516                | -0.124487 | 2.363261  |
| 12               | 6                | 0              | 1.493821                | 0.289536  | 0.422977  |
| 13               | 6                | 0              | 2.043293                | -0.976374 | 0.355198  |
| 14               | 7                | 0              | 0.661381                | 0.705900  | 1.409171  |
| 15               | 16               | 0              | -0.351727               | 4.059376  | -0.109529 |
| 16               | 17               | 0              | -0.707904               | 0.515225  | 3.613410  |
| 17               | 6                | 0              | 2.931308                | -1.407368 | -0.764722 |
| 18               | 6                | 0              | 2.394034                | -2.161996 | -1.820565 |
| 19               | 6                | 0              | 4.296927                | -1.091656 | -0.773821 |
| 20               | 6                | 0              | 3.213537                | -2.582306 | -2.869195 |
| 21               | 1                | 0              | 1.332844                | -2.393990 | -1.817067 |
| 22               | 6                | 0              | 5.113266                | -1.512554 | -1.825488 |
| 23               | 1                | 0              | 4.726069                | -0.531917 | 0.053923  |
| 24               | 6                | 0              | 4.572406                | -2.257786 | -2.875035 |
| 25               | 1                | 0              | 2.787098                | -3.161220 | -3.683568 |
| 26               | 1                | 0              | 6.170676                | -1.262648 | -1.821604 |
| 27               | 1                | 0              | 5.207518                | -2.585520 | -3.693250 |
| 28               | 7                | 0              | 1.747822                | 1.260390  | -0.612164 |
| 29               | 6                | 0              | 1.240576                | 1.046334  | -2.004377 |
| 30               | 1                | 0              | 2.011363                | 0.563251  | -2.606000 |
| 31               | 1                | 0              | 0.351981                | 0.420069  | -1.933137 |
| 32               | 1                | 0              | 0.971111                | 2.004544  | -2.446195 |
| 33               | 16               | 0              | 2.259047                | 2.770284  | -0.207630 |
| 34               | 8                | 0              | 1.229111                | 3.574094  | 0.670070  |
| 35               | 8                | 0              | 2.727984                | 3.453592  | -1.402888 |
| 36               | 6                | 0              | 3.535328                | 2.552483  | 1.034584  |
| 37               | 1                | 0              | 3.121539                | 2.021716  | 1.891929  |
| 38               | 1                | 0              | 4.349305                | 1.998649  | 0.564345  |
| 39               | 1                | 0              | 3.852945                | 3.557450  | 1.319099  |
| 40               | 47               | 0              | -1.532785               | 1.934384  | 0.222827  |
| 41               | 51               | 0              | -2.587180               | -1.130351 | -0.961745 |
| 42               | 9                | 0              | -2.207934               | 0.533025  | -1.802016 |
| 43               | 9                | 0              | -2.508537               | -2.012130 | -2.582733 |
| 44               | 9                | 0              | -0.715605               | -1.289624 | -0.766982 |
| 45               | 9                | 0              | -2.830053               | -2.669449 | 0.031395  |

|    |   |   |           |           |           |
|----|---|---|-----------|-----------|-----------|
| 46 | 9 | 0 | -2.533116 | -0.106033 | 0.670208  |
| 47 | 9 | 0 | -4.396491 | -0.784952 | -1.086351 |

-----

Zero-point correction= 0.306843 (Hartree/Particle)  
 Thermal correction to Energy= 0.340567  
 Thermal correction to Enthalpy= 0.341511  
 Thermal correction to Gibbs Free Energy= 0.237909  
 Sum of electronic and zero-point Energies= -2923.317876  
 Sum of electronic and thermal Energies= -2923.284152  
 Sum of electronic and thermal Enthalpies= -2923.283208  
 Sum of electronic and thermal Free Energies= -2923.386811  
 M06/6-311++G(d,p)-SDD/SMD//B3LYP/6-31G(d)-LANL2DZ energy in chlorobenzene solvent = -2924.511515

### 3aa

| Center Number | Atomic Number | Atomic Type | Coordinates (Angstroms) |           |           |
|---------------|---------------|-------------|-------------------------|-----------|-----------|
|               |               |             | X                       | Y         | Z         |
| 1             | 6             | 0           | -4.081268               | 2.186593  | -0.513114 |
| 2             | 6             | 0           | -3.935053               | 0.835930  | -0.292714 |
| 3             | 6             | 0           | -2.652242               | 0.284701  | -0.050236 |
| 4             | 6             | 0           | -1.497228               | 1.133552  | -0.044001 |
| 5             | 6             | 0           | -1.692413               | 2.525630  | -0.260824 |
| 6             | 6             | 0           | -2.950617               | 3.035228  | -0.490727 |
| 7             | 1             | 0           | -5.066795               | 2.603133  | -0.699701 |
| 8             | 1             | 0           | -4.796178               | 0.177955  | -0.300184 |
| 9             | 1             | 0           | -0.832612               | 3.185397  | -0.243466 |
| 10            | 1             | 0           | -3.076678               | 4.101734  | -0.656099 |
| 11            | 6             | 0           | -2.407265               | -1.093761 | 0.217841  |
| 12            | 6             | 0           | -0.142613               | -0.807942 | 0.406181  |
| 13            | 6             | 0           | -0.206346               | 0.563281  | 0.209351  |
| 14            | 7             | 0           | -1.236966               | -1.610918 | 0.421638  |
| 15            | 17            | 0           | -3.772546               | -2.218188 | 0.288849  |
| 16            | 6             | 0           | 1.007803                | 1.428390  | 0.285334  |
| 17            | 6             | 0           | 1.615684                | 1.682862  | 1.523990  |
| 18            | 6             | 0           | 1.549032                | 2.017884  | -0.867419 |
| 19            | 6             | 0           | 2.740034                | 2.504480  | 1.609332  |
| 20            | 1             | 0           | 1.201888                | 1.232630  | 2.421932  |
| 21            | 6             | 0           | 2.673189                | 2.841544  | -0.781053 |
| 22            | 1             | 0           | 1.099859                | 1.806619  | -1.832456 |
| 23            | 6             | 0           | 3.271954                | 3.087026  | 0.456467  |
| 24            | 1             | 0           | 3.197997                | 2.692484  | 2.576838  |
| 25            | 1             | 0           | 3.083170                | 3.286914  | -1.683587 |
| 26            | 1             | 0           | 4.146791                | 3.728331  | 0.522473  |
| 27            | 7             | 0           | 1.103449                | -1.467450 | 0.644202  |
| 28            | 6             | 0           | 1.067328                | -2.572088 | 1.622848  |
| 29            | 1             | 0           | 0.504564                | -3.436854 | 1.263942  |
| 30            | 1             | 0           | 2.090433                | -2.876387 | 1.855211  |
| 31            | 1             | 0           | 0.602573                | -2.189329 | 2.534635  |
| 32            | 16            | 0           | 2.059945                | -1.813037 | -0.756248 |
| 33            | 8             | 0           | 1.511553                | -1.038963 | -1.871353 |
| 34            | 8             | 0           | 2.243316                | -3.263898 | -0.861849 |
| 35            | 6             | 0           | 3.648786                | -1.102372 | -0.287979 |
| 36            | 1             | 0           | 3.528613                | -0.028184 | -0.148014 |
| 37            | 1             | 0           | 3.993267                | -1.583608 | 0.629204  |
| 38            | 1             | 0           | 4.340343                | -1.317224 | -1.106096 |

-----

Zero-point correction= 0.290067 (Hartree/Particle)  
 Thermal correction to Energy= 0.310423  
 Thermal correction to Enthalpy= 0.311368  
 Thermal correction to Gibbs Free Energy= 0.240379  
 Sum of electronic and zero-point Energies= -1774.834685  
 Sum of electronic and thermal Energies= -1774.814329  
 Sum of electronic and thermal Enthalpies= -1774.813385  
 Sum of electronic and thermal Free Energies= -1774.884373  
 M06/6-311++G(d,p)-SDD/SMD//B3LYP/6-31G(d)-LANL2DZ energy in chlorobenzene solvent = -1774.734357

### TS1f

| Center Number | Atomic Number | Atomic Type | Coordinates (Angstroms) |           |           |
|---------------|---------------|-------------|-------------------------|-----------|-----------|
|               |               |             | X                       | Y         | Z         |
| 1             | 6             | 0           | -4.041338               | -3.907467 | -0.369112 |
| 2             | 6             | 0           | -3.092255               | -2.893916 | -0.498180 |
| 3             | 6             | 0           | -3.037499               | -1.836197 | 0.428949  |
| 4             | 6             | 0           | -3.941251               | -1.848714 | 1.509129  |
| 5             | 6             | 0           | -4.869788               | -2.879110 | 1.650700  |
| 6             | 6             | 0           | -4.930931               | -3.907915 | 0.707806  |
| 7             | 1             | 0           | -4.070620               | -4.709163 | -1.101900 |
| 8             | 1             | 0           | -2.382447               | -2.912642 | -1.320849 |

|    |    |   |           |           |           |
|----|----|---|-----------|-----------|-----------|
| 9  | 1  | 0 | -3.895158 | -1.057956 | 2.252682  |
| 10 | 1  | 0 | -5.545515 | -2.879175 | 2.501953  |
| 11 | 1  | 0 | -5.654685 | -4.710194 | 0.819513  |
| 12 | 6  | 0 | -2.040716 | -0.748762 | 0.249013  |
| 13 | 6  | 0 | -2.391900 | 0.484735  | 0.476099  |
| 14 | 7  | 0 | -3.348052 | 1.393527  | 0.556365  |
| 15 | 6  | 0 | -3.444320 | 2.328832  | 1.691979  |
| 16 | 1  | 0 | -4.400417 | 2.848398  | 1.646189  |
| 17 | 1  | 0 | -3.376100 | 1.749924  | 2.615611  |
| 18 | 1  | 0 | -2.627536 | 3.055715  | 1.650643  |
| 19 | 16 | 0 | -4.165711 | 1.866449  | -0.963560 |
| 20 | 8  | 0 | -4.929185 | 3.066783  | -0.629175 |
| 21 | 8  | 0 | -3.174938 | 1.848507  | -2.034797 |
| 22 | 6  | 0 | -5.291802 | 0.481008  | -1.195375 |
| 23 | 1  | 0 | -5.838177 | 0.687119  | -2.119329 |
| 24 | 1  | 0 | -4.713234 | -0.439233 | -1.285444 |
| 25 | 1  | 0 | -5.972346 | 0.437165  | -0.344123 |
| 26 | 6  | 0 | 1.438616  | 2.582950  | 0.968013  |
| 27 | 6  | 0 | 1.217848  | 3.190352  | -0.286576 |
| 28 | 6  | 0 | 2.167077  | 4.044753  | -0.861133 |
| 29 | 6  | 0 | 3.343259  | 4.272762  | -0.158403 |
| 30 | 6  | 0 | 3.582582  | 3.664580  | 1.090652  |
| 31 | 6  | 0 | 2.641089  | 2.822229  | 1.658884  |
| 32 | 6  | 0 | 0.323020  | 1.748001  | 1.340169  |
| 33 | 1  | 0 | 1.997235  | 4.506136  | -1.828871 |
| 34 | 1  | 0 | 4.098863  | 4.925904  | -0.585701 |
| 35 | 1  | 0 | 4.520889  | 3.849703  | 1.604019  |
| 36 | 1  | 0 | 2.833698  | 2.337989  | 2.611019  |
| 37 | 7  | 0 | -0.649630 | 1.708380  | 0.453706  |
| 38 | 16 | 0 | -0.321240 | 2.677294  | -0.922254 |
| 39 | 47 | 0 | -0.038085 | -1.281552 | -0.335254 |
| 40 | 51 | 0 | 3.231608  | -1.284643 | -0.208429 |
| 41 | 9  | 0 | 1.893820  | -2.397925 | -1.029411 |
| 42 | 9  | 0 | 4.135825  | -2.778099 | 0.390920  |
| 43 | 9  | 0 | 4.325031  | -0.080968 | 0.673706  |
| 44 | 9  | 0 | 2.105305  | 0.124879  | -0.799408 |
| 45 | 9  | 0 | 2.081438  | -1.358692 | 1.304713  |
| 46 | 9  | 0 | 4.180101  | -1.213400 | -1.790503 |
| 47 | 6  | 0 | 0.259937  | 0.964234  | 2.617036  |
| 48 | 1  | 0 | 1.023498  | 0.178727  | 2.596898  |
| 49 | 1  | 0 | 0.460430  | 1.615685  | 3.475394  |
| 50 | 1  | 0 | -0.715867 | 0.493832  | 2.745363  |

-----  
Zero-point correction= 0.340123 (Hartree/Particle)  
Thermal correction to Energy= 0.375549  
Thermal correction to Enthalpy= 0.376493  
Thermal correction to Gibbs Free Energy= 0.266549  
Sum of electronic and zero-point Energies= -2502.960937  
Sum of electronic and thermal Energies= -2502.925512  
Sum of electronic and thermal Enthalpies= -2502.924567  
Sum of electronic and thermal Free Energies= -2503.034512  
M06/6-311++G(d,p)-SDD/SMD//B3LYP/6-31G(d)-LANL2DZ energy in chlorobenzene solvent = -2504.15863

## INT2f

| Center Number | Atomic Number | Atomic Type | Coordinates (Angstroms) |           |           |
|---------------|---------------|-------------|-------------------------|-----------|-----------|
|               |               |             | X                       | Y         | Z         |
| 1             | 6             | 0           | -3.985323               | -3.767193 | -0.706542 |
| 2             | 6             | 0           | -3.028525               | -2.760611 | -0.834483 |
| 3             | 6             | 0           | -2.740339               | -1.894772 | 0.238142  |
| 4             | 6             | 0           | -3.417207               | -2.101911 | 1.455391  |
| 5             | 6             | 0           | -4.349825               | -3.130258 | 1.591543  |
| 6             | 6             | 0           | -4.647490               | -3.960960 | 0.509063  |
| 7             | 1             | 0           | -4.199458               | -4.413941 | -1.553299 |
| 8             | 1             | 0           | -2.496037               | -2.631741 | -1.773283 |
| 9             | 1             | 0           | -3.192583               | -1.463718 | 2.305183  |
| 10            | 1             | 0           | -4.846202               | -3.281665 | 2.546741  |
| 11            | 1             | 0           | -5.376284               | -4.759636 | 0.614978  |
| 12            | 6             | 0           | -1.717709               | -0.837731 | 0.080971  |
| 13            | 6             | 0           | -2.021208               | 0.443938  | 0.364123  |
| 14            | 7             | 0           | -3.294990               | 0.985285  | 0.698344  |
| 15            | 6             | 0           | -3.451069               | 1.699593  | 1.972658  |
| 16            | 1             | 0           | -4.485092               | 2.025891  | 2.084660  |
| 17            | 1             | 0           | -3.200820               | 1.018051  | 2.791473  |
| 18            | 1             | 0           | -2.810096               | 2.588926  | 2.031666  |
| 19            | 16            | 0           | -4.362103               | 1.402713  | -0.578703 |
| 20            | 8             | 0           | -5.064877               | 2.626728  | -0.181885 |
| 21            | 8             | 0           | -3.586123               | 1.339039  | -1.822642 |
| 22            | 6             | 0           | -5.567146               | 0.065984  | -0.607016 |



|    |    |   |           |           |           |
|----|----|---|-----------|-----------|-----------|
| 23 | 1  | 0 | -6.293402 | 0.322174  | -1.382377 |
| 24 | 1  | 0 | -5.057343 | -0.868878 | -0.840228 |
| 25 | 1  | 0 | -6.054000 | 0.012587  | 0.368113  |
| 26 | 6  | 0 | 0.905524  | 2.724623  | 0.709585  |
| 27 | 6  | 0 | 0.431574  | 3.371335  | -0.452614 |
| 28 | 6  | 0 | 1.110692  | 4.464983  | -1.004766 |
| 29 | 6  | 0 | 2.277559  | 4.884039  | -0.379479 |
| 30 | 6  | 0 | 2.774336  | 4.234065  | 0.769914  |
| 31 | 6  | 0 | 2.100055  | 3.158327  | 1.318699  |
| 32 | 6  | 0 | 0.057899  | 1.641646  | 1.101437  |
| 33 | 1  | 0 | 0.746064  | 4.962291  | -1.897668 |
| 34 | 1  | 0 | 2.826243  | 5.725116  | -0.793193 |
| 35 | 1  | 0 | 3.702509  | 4.574365  | 1.217281  |
| 36 | 1  | 0 | 2.497479  | 2.635007  | 2.181822  |
| 37 | 7  | 0 | -0.972210 | 1.470905  | 0.273490  |
| 38 | 16 | 0 | -1.009255 | 2.610438  | -1.054834 |
| 39 | 47 | 0 | 0.225108  | -1.442820 | -0.541667 |
| 40 | 51 | 0 | 3.495598  | -1.022590 | -0.047749 |
| 41 | 9  | 0 | 2.327383  | -2.089878 | -1.150321 |
| 42 | 9  | 0 | 4.544666  | -2.499290 | 0.302456  |
| 43 | 9  | 0 | 4.414594  | 0.102980  | 1.100719  |
| 44 | 9  | 0 | 2.264474  | 0.373131  | -0.410233 |
| 45 | 9  | 0 | 2.318219  | -1.502099 | 1.359131  |
| 46 | 9  | 0 | 4.480031  | -0.547155 | -1.535522 |
| 47 | 6  | 0 | 0.292673  | 0.788052  | 2.301130  |
| 48 | 1  | 0 | 1.121113  | 0.099779  | 2.091046  |
| 49 | 1  | 0 | 0.575611  | 1.417643  | 3.150979  |
| 50 | 1  | 0 | -0.584272 | 0.194399  | 2.557058  |

-----  
Zero-point correction= 0.343125 (Hartree/Particle)  
Thermal correction to Energy= 0.378031  
Thermal correction to Enthalpy= 0.378975  
Thermal correction to Gibbs Free Energy= 0.271958  
Sum of electronic and zero-point Energies= -2502.985661  
Sum of electronic and thermal Energies= -2502.950755  
Sum of electronic and thermal Enthalpies= -2502.949811  
Sum of electronic and thermal Free Energies= -2503.056828  
M06/6-311++G(d,p)-SDD/SMD//B3LYP/6-31G(d)-LANL2DZ energy in chlorobenzene solvent = -2504.191171

#### TS2f

| Center Number | Atomic Number | Atomic Type | Coordinates (Angstroms) |           |           |
|---------------|---------------|-------------|-------------------------|-----------|-----------|
|               |               |             | X                       | Y         | Z         |
| 1             | 6             | 0           | 1.693853                | -3.593431 | 1.435337  |
| 2             | 6             | 0           | 1.082204                | -2.578623 | 0.708660  |
| 3             | 6             | 0           | -0.277641               | -2.235295 | 0.944736  |
| 4             | 6             | 0           | -0.986697               | -2.952003 | 1.954956  |
| 5             | 6             | 0           | -0.368665               | -3.960974 | 2.674557  |
| 6             | 6             | 0           | 0.974774                | -4.282896 | 2.414779  |
| 7             | 1             | 0           | 2.737608                | -3.826020 | 1.249711  |
| 8             | 1             | 0           | 1.642948                | -2.030954 | -0.037957 |
| 9             | 1             | 0           | -2.020102               | -2.689378 | 2.161808  |
| 10            | 1             | 0           | -0.913832               | -4.493868 | 3.448601  |
| 11            | 1             | 0           | 1.459005                | -5.067045 | 2.990650  |
| 12            | 6             | 0           | -0.860189               | -1.154075 | 0.218285  |
| 13            | 6             | 0           | -2.214516               | -0.814162 | 0.168482  |
| 14            | 7             | 0           | -3.246925               | -1.698495 | -0.212403 |
| 15            | 6             | 0           | -4.631605               | -1.189310 | -0.173041 |
| 16            | 1             | 0           | -5.309815               | -1.985485 | -0.478352 |
| 17            | 1             | 0           | -4.869702               | -0.903442 | 0.853783  |
| 18            | 1             | 0           | -4.776427               | -0.334276 | -0.840730 |
| 19            | 16            | 0           | -2.937064               | -2.796818 | -1.562525 |
| 20            | 8             | 0           | -4.056863               | -2.660064 | -2.492865 |
| 21            | 8             | 0           | -1.553826               | -2.604457 | -1.984572 |
| 22            | 6             | 0           | -3.076269               | -4.396330 | -0.747636 |
| 23            | 1             | 0           | -2.923460               | -5.152660 | -1.521555 |
| 24            | 1             | 0           | -2.304722               | -4.466732 | 0.020364  |
| 25            | 1             | 0           | -4.075378               | -4.491711 | -0.318321 |
| 26            | 6             | 0           | -2.927652               | 2.746778  | 0.844477  |
| 27            | 6             | 0           | -2.222376               | 3.210765  | -0.306133 |
| 28            | 6             | 0           | -2.139926               | 4.603518  | -0.517499 |
| 29            | 6             | 0           | -2.769314               | 5.495625  | 0.338399  |
| 30            | 6             | 0           | -3.482873               | 5.036031  | 1.457221  |
| 31            | 6             | 0           | -3.546431               | 3.676663  | 1.709177  |
| 32            | 6             | 0           | -2.924341               | 1.324339  | 1.151821  |
| 33            | 1             | 0           | -1.581903               | 4.968234  | -1.373662 |
| 34            | 1             | 0           | -2.701127               | 6.561948  | 0.140742  |
| 35            | 1             | 0           | -3.969278               | 5.739265  | 2.125926  |
| 36            | 1             | 0           | -4.089295               | 3.322142  | 2.579771  |

|    |    |   |           |           |           |
|----|----|---|-----------|-----------|-----------|
| 37 | 7  | 0 | -2.505684 | 0.510166  | 0.241612  |
| 38 | 16 | 0 | -1.489235 | 2.130749  | -1.470164 |
| 39 | 47 | 0 | 0.355855  | 0.625022  | -0.468241 |
| 40 | 51 | 0 | 3.628425  | 0.442847  | -0.133331 |
| 41 | 9  | 0 | 4.852656  | 0.720445  | -1.486877 |
| 42 | 9  | 0 | 4.399016  | -1.146397 | 0.434085  |
| 43 | 9  | 0 | 4.558268  | 1.488086  | 1.072485  |
| 44 | 9  | 0 | 2.244516  | 0.182989  | 1.156671  |
| 45 | 9  | 0 | 2.560497  | 1.909123  | -0.695888 |
| 46 | 9  | 0 | 2.523580  | -0.575525 | -1.312924 |
| 47 | 6  | 0 | -3.329824 | 0.834284  | 2.525365  |
| 48 | 1  | 0 | -2.823326 | 1.415028  | 3.302224  |
| 49 | 1  | 0 | -4.409974 | 0.951378  | 2.674800  |
| 50 | 1  | 0 | -3.073384 | -0.219988 | 2.647869  |

-----  
Zero-point correction= 0.341054 (Hartree/Particle)  
Thermal correction to Energy= 0.375910  
Thermal correction to Enthalpy= 0.376854  
Thermal correction to Gibbs Free Energy= 0.270585  
Sum of electronic and zero-point Energies= -2502.936447  
Sum of electronic and thermal Energies= -2502.901592  
Sum of electronic and thermal Enthalpies= -2502.900648  
Sum of electronic and thermal Free Energies= -2503.006917  
M06/6-311++G(d,p)-SDD/SMD//B3LYP/6-31G(d)-LANL2DZ energy in chlorobenzene solvent = -2504.191173

### INT3f

| Center<br>Number | Atomic<br>Number | Atomic<br>Type | Coordinates (Angstroms) |           |           |
|------------------|------------------|----------------|-------------------------|-----------|-----------|
|                  |                  |                | X                       | Y         | Z         |
| 1                | 6                | 0              | 1.733299                | -3.486686 | 1.480037  |
| 2                | 6                | 0              | 1.097300                | -2.521136 | 0.708970  |
| 3                | 6                | 0              | -0.266564               | -2.188994 | 0.938864  |
| 4                | 6                | 0              | -0.957586               | -2.871235 | 1.985831  |
| 5                | 6                | 0              | -0.317851               | -3.835767 | 2.745482  |
| 6                | 6                | 0              | 1.031175                | -4.143046 | 2.493634  |
| 7                | 1                | 0              | 2.781803                | -3.701608 | 1.301355  |
| 8                | 1                | 0              | 1.642228                | -2.001556 | -0.067801 |
| 9                | 1                | 0              | -1.993978               | -2.616428 | 2.188410  |
| 10               | 1                | 0              | -0.848787               | -4.343372 | 3.545928  |
| 11               | 1                | 0              | 1.532764                | -4.889668 | 3.103550  |
| 12               | 6                | 0              | -0.868749               | -1.152660 | 0.168041  |
| 13               | 6                | 0              | -2.225978               | -0.813007 | 0.133786  |
| 14               | 7                | 0              | -3.264038               | -1.690880 | -0.236188 |
| 15               | 6                | 0              | -4.640337               | -1.156787 | -0.234313 |
| 16               | 1                | 0              | -5.324583               | -1.943958 | -0.548210 |
| 17               | 1                | 0              | -4.897565               | -0.852526 | 0.782657  |
| 18               | 1                | 0              | -4.749830               | -0.306923 | -0.915086 |
| 19               | 16               | 0              | -2.951816               | -2.866220 | -1.516879 |
| 20               | 8                | 0              | -4.068023               | -2.778537 | -2.456568 |
| 21               | 8                | 0              | -1.566595               | -2.701549 | -1.943476 |
| 22               | 6                | 0              | -3.099495               | -4.416701 | -0.613726 |
| 23               | 1                | 0              | -2.947533               | -5.215678 | -1.343768 |
| 24               | 1                | 0              | -2.330005               | -4.447971 | 0.158972  |
| 25               | 1                | 0              | -4.100287               | -4.483580 | -0.182979 |
| 26               | 6                | 0              | -2.890142               | 2.748371  | 0.848220  |
| 27               | 6                | 0              | -2.187502               | 3.228165  | -0.299282 |
| 28               | 6                | 0              | -2.097891               | 4.625110  | -0.482890 |
| 29               | 6                | 0              | -2.716952               | 5.506951  | 0.390549  |
| 30               | 6                | 0              | -3.428091               | 5.032212  | 1.504325  |
| 31               | 6                | 0              | -3.497647               | 3.669081  | 1.731653  |
| 32               | 6                | 0              | -2.898919               | 1.322724  | 1.144527  |
| 33               | 1                | 0              | -1.541057               | 5.000960  | -1.334972 |
| 34               | 1                | 0              | -2.642207               | 6.576065  | 0.210994  |
| 35               | 1                | 0              | -3.907214               | 5.725887  | 2.188154  |
| 36               | 1                | 0              | -4.038199               | 3.303263  | 2.598943  |
| 37               | 7                | 0              | -2.514252               | 0.507262  | 0.221423  |
| 38               | 16               | 0              | -1.467593               | 2.180808  | -1.503887 |
| 39               | 47               | 0              | 0.335507                | 0.655792  | -0.536093 |
| 40               | 51               | 0              | 3.607324                | 0.408855  | -0.134903 |
| 41               | 9                | 0              | 4.892207                | 0.596672  | -1.446765 |
| 42               | 9                | 0              | 4.243900                | -1.237805 | 0.446232  |
| 43               | 9                | 0              | 4.573105                | 1.372887  | 1.109434  |
| 44               | 9                | 0              | 2.172651                | 0.229465  | 1.116316  |
| 45               | 9                | 0              | 2.655942                | 1.935829  | -0.717761 |
| 46               | 9                | 0              | 2.473923                | -0.536984 | -1.351729 |
| 47               | 6                | 0              | -3.283616               | 0.828685  | 2.523340  |
| 48               | 1                | 0              | -2.757502               | 1.397830  | 3.295616  |
| 49               | 1                | 0              | -4.359758               | 0.955231  | 2.693254  |
| 50               | 1                | 0              | -3.037404               | -0.229465 | 2.633552  |

-----  
 Zero-point correction= 0.341139 (Hartree/Particle)  
 Thermal correction to Energy= 0.376885  
 Thermal correction to Enthalpy= 0.377829  
 Thermal correction to Gibbs Free Energy= 0.268498  
 Sum of electronic and zero-point Energies= -2502.936386  
 Sum of electronic and thermal Energies= -2502.900641  
 Sum of electronic and thermal Enthalpies= -2502.899697  
 Sum of electronic and thermal Free Energies= -2503.009028  
 M06/6-311++G(d,p)-SDD/SMD//B3LYP/6-31G(d)-LANL2DZ energy in chlorobenzene solvent = -2504.135695

**TS1g**

-----

| Center Number | Atomic Number | Atomic Type | Coordinates (Angstroms) |           |           |
|---------------|---------------|-------------|-------------------------|-----------|-----------|
|               |               |             | X                       | Y         | Z         |
| 1             | 6             | 0           | -3.875545               | -4.059774 | -0.322701 |
| 2             | 6             | 0           | -2.977033               | -3.003636 | -0.471382 |
| 3             | 6             | 0           | -3.029504               | -1.886036 | 0.382159  |
| 4             | 6             | 0           | -3.991281               | -1.878286 | 1.411066  |
| 5             | 6             | 0           | -4.870660               | -2.947724 | 1.573669  |
| 6             | 6             | 0           | -4.823445               | -4.039051 | 0.702667  |
| 7             | 1             | 0           | -3.820467               | -4.908594 | -0.998794 |
| 8             | 1             | 0           | -2.221993               | -3.036133 | -1.252430 |
| 9             | 1             | 0           | -4.031024               | -1.038403 | 2.098649  |
| 10            | 1             | 0           | -5.593428               | -2.929444 | 2.385230  |
| 11            | 1             | 0           | -5.509314               | -4.871651 | 0.831023  |
| 12            | 6             | 0           | -2.081070               | -0.759118 | 0.179463  |
| 13            | 6             | 0           | -2.487457               | 0.463593  | 0.354746  |
| 14            | 7             | 0           | -3.474955               | 1.335502  | 0.455431  |
| 15            | 6             | 0           | -3.552925               | 2.287163  | 1.581040  |
| 16            | 1             | 0           | -4.572450               | 2.662347  | 1.661667  |
| 17            | 1             | 0           | -3.267444               | 1.748309  | 2.485320  |
| 18            | 1             | 0           | -2.858888               | 3.118206  | 1.422604  |
| 19            | 16            | 0           | -4.263801               | 1.847382  | -1.062037 |
| 20            | 8             | 0           | -5.177333               | 2.918108  | -0.669363 |
| 21            | 8             | 0           | -3.235308               | 2.047384  | -2.080087 |
| 22            | 6             | 0           | -5.200228               | 0.365177  | -1.469671 |
| 23            | 1             | 0           | -5.717612               | 0.584341  | -2.407055 |
| 24            | 1             | 0           | -4.512402               | -0.471603 | -1.596922 |
| 25            | 1             | 0           | -5.912534               | 0.169930  | -0.667278 |
| 26            | 6             | 0           | 1.343223                | 2.471753  | 0.873980  |
| 27            | 6             | 0           | 1.296074                | 2.861224  | -0.484575 |
| 28            | 6             | 0           | 2.374458                | 3.501117  | -1.107820 |
| 29            | 6             | 0           | 3.512931                | 3.744410  | -0.355137 |
| 30            | 6             | 0           | 3.578517                | 3.369591  | 1.000516  |
| 31            | 6             | 0           | 2.510511                | 2.743097  | 1.619348  |
| 32            | 6             | 0           | 0.086495                | 1.838036  | 1.231173  |
| 33            | 1             | 0           | 2.324353                | 3.784003  | -2.154670 |
| 34            | 1             | 0           | 4.369150                | 4.224600  | -0.819706 |
| 35            | 1             | 0           | 4.484272                | 3.563777  | 1.566047  |
| 36            | 1             | 0           | 2.591993                | 2.456603  | 2.659091  |
| 37            | 7             | 0           | -0.801044               | 1.752280  | 0.261121  |
| 38            | 16            | 0           | -0.244265               | 2.453137  | -1.189425 |
| 39            | 47            | 0           | -0.035002               | -1.227848 | -0.303546 |
| 40            | 51            | 0           | 3.243947                | -1.210256 | -0.280741 |
| 41            | 9             | 0           | 1.901660                | -2.545271 | -0.594718 |
| 42            | 9             | 0           | 4.180813                | -2.378963 | 0.799347  |
| 43            | 9             | 0           | 4.360777                | 0.221549  | 0.069950  |
| 44            | 9             | 0           | 2.076455                | -0.106600 | -1.292355 |
| 45            | 9             | 0           | 2.139944                | -0.725762 | 1.195085  |
| 46            | 9             | 0           | 4.141814                | -1.714843 | -1.812329 |
| 47            | 8             | 0           | -0.318128               | 1.368623  | 2.420941  |
| 48            | 6             | 0           | 0.627439                | 0.939245  | 3.416678  |
| 49            | 1             | 0           | 0.059222                | 0.288973  | 4.083643  |
| 50            | 1             | 0           | 1.444236                | 0.377812  | 2.961673  |
| 51            | 1             | 0           | 0.999161                | 1.797480  | 3.985846  |

-----

Zero-point correction= 0.345130 (Hartree/Particle)  
 Thermal correction to Energy= 0.381704  
 Thermal correction to Enthalpy= 0.382648  
 Thermal correction to Gibbs Free Energy= 0.269682  
 Sum of electronic and zero-point Energies= -2578.156789  
 Sum of electronic and thermal Energies= -2578.120215  
 Sum of electronic and thermal Enthalpies= -2578.119270  
 Sum of electronic and thermal Free Energies= -2578.232237  
 M06/6-311++G(d,p)-SDD/SMD//B3LYP/6-31G(d)-LANL2DZ energy in chlorobenzene solvent = -2579.353372

**INT2g**

| Center Number | Atomic Number | Atomic Type | Coordinates (Angstroms) |           |           |
|---------------|---------------|-------------|-------------------------|-----------|-----------|
|               |               |             | X                       | Y         | Z         |
| 1             | 6             | 0           | -4.414067               | -3.522182 | -0.599089 |
| 2             | 6             | 0           | -3.338007               | -2.644255 | -0.728019 |
| 3             | 6             | 0           | -3.041544               | -1.707693 | 0.280952  |
| 4             | 6             | 0           | -3.839008               | -1.711890 | 1.441616  |
| 5             | 6             | 0           | -4.894838               | -2.612317 | 1.582722  |
| 6             | 6             | 0           | -5.195497               | -3.514348 | 0.559531  |
| 7             | 1             | 0           | -4.630234               | -4.226759 | -1.397941 |
| 8             | 1             | 0           | -2.714669               | -2.674113 | -1.618149 |
| 9             | 1             | 0           | -3.612350               | -1.015550 | 2.243432  |
| 10            | 1             | 0           | -5.486216               | -2.607530 | 2.495006  |
| 11            | 1             | 0           | -6.020566               | -4.212731 | 0.669006  |
| 12            | 6             | 0           | -1.893893               | -0.789478 | 0.125482  |
| 13            | 6             | 0           | -2.050787               | 0.538156  | 0.279738  |
| 14            | 7             | 0           | -3.266440               | 1.251268  | 0.485959  |
| 15            | 6             | 0           | -3.398689               | 2.088718  | 1.687814  |
| 16            | 1             | 0           | -4.428620               | 2.433911  | 1.783671  |
| 17            | 1             | 0           | -3.141841               | 1.474556  | 2.554390  |
| 18            | 1             | 0           | -2.744609               | 2.969907  | 1.662984  |
| 19            | 16            | 0           | -4.124456               | 1.762793  | -0.908097 |
| 20            | 8             | 0           | -4.725203               | 3.065045  | -0.602826 |
| 21            | 8             | 0           | -3.234503               | 1.589157  | -2.063834 |
| 22            | 6             | 0           | -5.454948               | 0.559572  | -1.056485 |
| 23            | 1             | 0           | -6.048553               | 0.856667  | -1.924562 |
| 24            | 1             | 0           | -5.023101               | -0.431705 | -1.197356 |
| 25            | 1             | 0           | -6.059667               | 0.593968  | -0.148877 |
| 26            | 6             | 0           | 1.181172                | 2.343630  | 0.777025  |
| 27            | 6             | 0           | 1.006137                | 2.812232  | -0.546823 |
| 28            | 6             | 0           | 1.958841                | 3.627759  | -1.168839 |
| 29            | 6             | 0           | 3.102756                | 3.955840  | -0.458047 |
| 30            | 6             | 0           | 3.302246                | 3.487615  | 0.854716  |
| 31            | 6             | 0           | 2.358464                | 2.691417  | 1.476434  |
| 32            | 6             | 0           | 0.052596                | 1.537602  | 1.165829  |
| 33            | 1             | 0           | 1.813199                | 3.975976  | -2.186374 |
| 34            | 1             | 0           | 3.863124                | 4.573084  | -0.927052 |
| 35            | 1             | 0           | 4.217034                | 3.739466  | 1.380539  |
| 36            | 1             | 0           | 2.547916                | 2.326664  | 2.475431  |
| 37            | 7             | 0           | -0.865155               | 1.401132  | 0.197230  |
| 38            | 16            | 0           | -0.475374               | 2.261851  | -1.264332 |
| 39            | 47            | 0           | 0.025242                | -1.599279 | -0.292839 |
| 40            | 51            | 0           | 3.335324                | -1.048758 | -0.242186 |
| 41            | 9             | 0           | 2.097361                | -2.482974 | -0.592059 |
| 42            | 9             | 0           | 4.338258                | -2.187757 | 0.811043  |
| 43            | 9             | 0           | 4.370013                | 0.434542  | 0.161752  |
| 44            | 9             | 0           | 2.126938                | 0.013769  | -1.226312 |
| 45            | 9             | 0           | 2.221688                | -0.667951 | 1.251679  |
| 46            | 9             | 0           | 4.271604                | -1.462709 | -1.777706 |
| 47            | 8             | 0           | -0.247714               | 0.963232  | 2.311967  |
| 48            | 6             | 0           | 0.698052                | 0.828625  | 3.394484  |
| 49            | 1             | 0           | 0.190476                | 0.189669  | 4.116455  |
| 50            | 1             | 0           | 1.605057                | 0.344785  | 3.034813  |
| 51            | 1             | 0           | 0.896798                | 1.805576  | 3.843800  |

Zero-point correction= 0.348389 (Hartree/Particle)  
 Thermal correction to Energy= 0.384372  
 Thermal correction to Enthalpy= 0.385316  
 Thermal correction to Gibbs Free Energy= 0.276346  
 Sum of electronic and zero-point Energies= -2578.181678  
 Sum of electronic and thermal Energies= -2578.145695  
 Sum of electronic and thermal Enthalpies= -2578.144751  
 Sum of electronic and thermal Free Energies= -2578.253721  
 M06/6-311++G(d,p)-SDD/SMD//B3LYP/6-31G(d)-LANL2DZ energy in chlorobenzene solvent = -2579.387327

### TS2g

| Center Number | Atomic Number | Atomic Type | Coordinates (Angstroms) |           |          |
|---------------|---------------|-------------|-------------------------|-----------|----------|
|               |               |             | X                       | Y         | Z        |
| 1             | 6             | 0           | 1.320763                | -3.948036 | 1.384868 |
| 2             | 6             | 0           | 0.868225                | -2.824726 | 0.701491 |
| 3             | 6             | 0           | -0.458310               | -2.350647 | 0.888123 |
| 4             | 6             | 0           | -1.294849               | -3.037190 | 1.815634 |
| 5             | 6             | 0           | -0.829445               | -4.147401 | 2.502598 |
| 6             | 6             | 0           | 0.478828                | -4.608477 | 2.283775 |
| 7             | 1             | 0           | 2.336408                | -4.298119 | 1.228702 |
| 8             | 1             | 0           | 1.529689                | -2.296410 | 0.022911 |
| 9             | 1             | 0           | -2.301969               | -2.671045 | 1.988572 |
| 10            | 1             | 0           | -1.471097               | -4.655594 | 3.217135 |

|    |    |   |           |           |           |
|----|----|---|-----------|-----------|-----------|
| 11 | 1  | 0 | 0.840786  | -5.477425 | 2.826749  |
| 12 | 6  | 0 | -0.881615 | -1.165319 | 0.202649  |
| 13 | 6  | 0 | -2.198987 | -0.730891 | 0.065574  |
| 14 | 7  | 0 | -3.282031 | -1.562220 | -0.294659 |
| 15 | 6  | 0 | -4.647820 | -1.015126 | -0.171815 |
| 16 | 1  | 0 | -5.366765 | -1.819912 | -0.334021 |
| 17 | 1  | 0 | -4.768205 | -0.634066 | 0.843329  |
| 18 | 1  | 0 | -4.847359 | -0.221901 | -0.899050 |
| 19 | 16 | 0 | -3.069714 | -2.580759 | -1.719936 |
| 20 | 8  | 0 | -4.153113 | -2.264975 | -2.651006 |
| 21 | 8  | 0 | -1.666451 | -2.499736 | -2.114060 |
| 22 | 6  | 0 | -3.381018 | -4.213322 | -1.026383 |
| 23 | 1  | 0 | -3.298563 | -4.922539 | -1.853629 |
| 24 | 1  | 0 | -2.628889 | -4.416679 | -0.262976 |
| 25 | 1  | 0 | -4.388982 | -4.239308 | -0.607990 |
| 26 | 6  | 0 | -2.803117 | 2.882661  | 0.599728  |
| 27 | 6  | 0 | -2.008473 | 3.278221  | -0.510906 |
| 28 | 6  | 0 | -1.839690 | 4.656902  | -0.748769 |
| 29 | 6  | 0 | -2.481524 | 5.590846  | 0.053918  |
| 30 | 6  | 0 | -3.297065 | 5.191710  | 1.127763  |
| 31 | 6  | 0 | -3.450173 | 3.843482  | 1.402406  |
| 32 | 6  | 0 | -2.868632 | 1.469418  | 0.893776  |
| 33 | 1  | 0 | -1.215137 | 4.979555  | -1.575439 |
| 34 | 1  | 0 | -2.350297 | 6.648788  | -0.156348 |
| 35 | 1  | 0 | -3.798317 | 5.935289  | 1.739242  |
| 36 | 1  | 0 | -4.079346 | 3.509826  | 2.221696  |
| 37 | 7  | 0 | -2.390619 | 0.622144  | 0.044794  |
| 38 | 16 | 0 | -1.295443 | 2.082167  | -1.562747 |
| 39 | 47 | 0 | 0.538848  | 0.387790  | -0.414084 |
| 40 | 51 | 0 | 3.815227  | 0.354504  | -0.107324 |
| 41 | 9  | 0 | 4.935143  | 0.648806  | -1.545562 |
| 42 | 9  | 0 | 4.870503  | -0.975598 | 0.625422  |
| 43 | 9  | 0 | 4.575444  | 1.702636  | 0.902140  |
| 44 | 9  | 0 | 2.502257  | 0.080218  | 1.242834  |
| 45 | 9  | 0 | 2.539146  | 1.596891  | -0.823897 |
| 46 | 9  | 0 | 2.842395  | -0.941581 | -1.100503 |
| 47 | 8  | 0 | -3.413050 | 1.034783  | 2.065246  |
| 48 | 6  | 0 | -2.557388 | 1.153146  | 3.226123  |
| 49 | 1  | 0 | -1.687593 | 0.496000  | 3.122230  |
| 50 | 1  | 0 | -2.230040 | 2.187183  | 3.365897  |
| 51 | 1  | 0 | -3.167000 | 0.834106  | 4.071850  |

-----  
Zero-point correction= 0.345899 (Hartree/Particle)  
Thermal correction to Energy= 0.382013  
Thermal correction to Enthalpy= 0.382957  
Thermal correction to Gibbs Free Energy= 0.272344  
Sum of electronic and zero-point Energies= -2578.138164  
Sum of electronic and thermal Energies= -2578.102050  
Sum of electronic and thermal Enthalpies= -2578.101106  
Sum of electronic and thermal Free Energies= -2578.211720  
M06/6-311++G(d,p)-SDD/SMD/B3LYP/6-31G(d)-LANL2DZ energy in chlorobenzene solvent = -2579.330462

### INT3g

| Center<br>Number | Atomic<br>Number | Atomic<br>Type | Coordinates (Angstroms) |           |           |
|------------------|------------------|----------------|-------------------------|-----------|-----------|
|                  |                  |                | X                       | Y         | Z         |
| 1                | 6                | 0              | 1.323551                | -3.914559 | 1.426386  |
| 2                | 6                | 0              | 0.872824                | -2.810423 | 0.708322  |
| 3                | 6                | 0              | -0.455902               | -2.327929 | 0.891467  |
| 4                | 6                | 0              | -1.290970               | -2.980895 | 1.844612  |
| 5                | 6                | 0              | -0.827239               | -4.072077 | 2.560216  |
| 6                | 6                | 0              | 0.477490                | -4.541588 | 2.344674  |
| 7                | 1                | 0              | 2.336431                | -4.269656 | 1.283352  |
| 8                | 1                | 0              | 1.524280                | -2.305947 | 0.004507  |
| 9                | 1                | 0              | -2.295207               | -2.603640 | 2.010281  |
| 10               | 1                | 0              | -1.470849               | -4.562317 | 3.287909  |
| 11               | 1                | 0              | 0.834654                | -5.403649 | 2.908015  |
| 12               | 6                | 0              | -0.888923               | -1.192247 | 0.135130  |
| 13               | 6                | 0              | -2.213577               | -0.739613 | 0.042810  |
| 14               | 7                | 0              | -3.303140               | -1.563171 | -0.309580 |
| 15               | 6                | 0              | -4.657714               | -0.978148 | -0.221149 |
| 16               | 1                | 0              | -5.395618               | -1.765111 | -0.386291 |
| 17               | 1                | 0              | -4.784662               | -0.581863 | 0.790360  |
| 18               | 1                | 0              | -4.816355               | -0.183092 | -0.955379 |
| 19               | 16               | 0              | -3.094945               | -2.618866 | -1.713675 |
| 20               | 8                | 0              | -4.165204               | -2.300065 | -2.657878 |
| 21               | 8                | 0              | -1.689573               | -2.578484 | -2.090127 |
| 22               | 6                | 0              | -3.449016               | -4.224374 | -0.984908 |
| 23               | 1                | 0              | -3.376186               | -4.958676 | -1.788068 |

|    |    |   |           |           |           |
|----|----|---|-----------|-----------|-----------|
| 24 | 1  | 0 | -2.708222 | -4.428821 | -0.204687 |
| 25 | 1  | 0 | -4.464788 | -4.219213 | -0.570880 |
| 26 | 6  | 0 | -2.742880 | 2.883524  | 0.570068  |
| 27 | 6  | 0 | -1.879659 | 3.286355  | -0.492106 |
| 28 | 6  | 0 | -1.708541 | 4.667810  | -0.704172 |
| 29 | 6  | 0 | -2.410636 | 5.602613  | 0.052152  |
| 30 | 6  | 0 | -3.288606 | 5.196012  | 1.071502  |
| 31 | 6  | 0 | -3.443961 | 3.845241  | 1.332175  |
| 32 | 6  | 0 | -2.847541 | 1.467728  | 0.892879  |
| 33 | 1  | 0 | -1.029356 | 4.995706  | -1.488564 |
| 34 | 1  | 0 | -2.268295 | 6.657678  | -0.147858 |
| 35 | 1  | 0 | -3.833299 | 5.931556  | 1.656860  |
| 36 | 1  | 0 | -4.121842 | 3.506272  | 2.109280  |
| 37 | 7  | 0 | -2.398368 | 0.597545  | 0.070666  |
| 38 | 16 | 0 | -1.088826 | 2.158005  | -1.573687 |
| 39 | 47 | 0 | 0.507798  | 0.420816  | -0.446415 |
| 40 | 51 | 0 | 3.793786  | 0.310249  | -0.100724 |
| 41 | 9  | 0 | 4.970286  | 0.558061  | -1.505951 |
| 42 | 9  | 0 | 4.784529  | -1.053534 | 0.671073  |
| 43 | 9  | 0 | 4.568325  | 1.629113  | 0.937661  |
| 44 | 9  | 0 | 2.424723  | 0.071581  | 1.209524  |
| 45 | 9  | 0 | 2.581243  | 1.582642  | -0.850572 |
| 46 | 9  | 0 | 2.806888  | -0.966237 | -1.106066 |
| 47 | 8  | 0 | -3.418957 | 1.071894  | 2.071086  |
| 48 | 6  | 0 | -2.626284 | 1.293939  | 3.263642  |
| 49 | 1  | 0 | -1.726510 | 0.657802  | 3.240625  |
| 50 | 1  | 0 | -2.331128 | 2.343899  | 3.354377  |
| 51 | 1  | 0 | -3.260296 | 1.011605  | 4.096926  |

-----  
Zero-point correction= 0.346090 (Hartree/Particle)  
Thermal correction to Energy= 0.383115  
Thermal correction to Enthalpy= 0.384059  
Thermal correction to Gibbs Free Energy= 0.272226  
Sum of electronic and zero-point Energies= -2578.147060  
Sum of electronic and thermal Energies= -2578.110035  
Sum of electronic and thermal Enthalpies= -2578.109091  
Sum of electronic and thermal Free Energies= -2578.220925  
M06/6-311++G(d,p)-SDD/SMD//B3LYP/6-31G(d)-LANL2DZ energy in chlorobenzene solvent = -2579.349826
